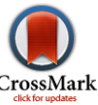

# Dissecting Domain-Specific Evolutionary Pressure Profiles of Transient Receptor Potential Vanilloid Subfamily Members 1 to 4

Pau Doñate-Macián, Alex Perálvarez-Marín\*

Unitat de Biofísica, Centre d'Estudis en Biofísica, Departament de Bioquímica i de Biologia Molecular, Universitat Autònoma de Barcelona, Bellaterra, Spain

## Abstract

The transient receptor potential vanilloid family includes four ion channels—TRPV1, TRPV2, TRPV3 and TRPV4—that are represented within the vertebrate subphylum and involved in several sensory and physiological processes. These channels are related to adaptation to the environment, and probably under strong evolutionary pressure. Using multiple sequence alignments as source for evolutionary, bioinformatics and statistical analysis, we have analyzed the evolutionary profiles for TRPV1, TRPV2, TRPV3 and TRPV4. The evolutionary pressure exerted over vertebrate TRPV2 sequences compared to the other channels argues for a positive selection profile for TRPV2 compared to TRPV1, TRPV3 and TRPV4. We have analyzed the selective pressure on specific protein domains, observing a common selective pressure trend for the common TRPV scaffold, consisting of the ankyrin repeat domain, the membrane proximal domain, the transmembrane domain, and the TRP domain. Through a more detailed analysis we have identified evolutionary constraints involved in the subunit contact at the transmembrane domain level. Performing evolutionary comparison, we have translated specific channel structural information such as the transmembrane topology, and the interaction between the membrane proximal domain and the TRP box. We have also identified potential common regulatory domains among all TRPV1-4 members, such as protein-protein, lipid-protein and vesicle trafficking domains.

**Citation:** Doñate-Macián P, Perálvarez-Marín A (2014) Dissecting Domain-Specific Evolutionary Pressure Profiles of Transient Receptor Potential Vanilloid Subfamily Members 1 to 4. PLoS ONE 9(10): e110715. doi:10.1371/journal.pone.0110715

**Editor:** Mandë Holford, The City University of New York-Graduate Center, United States of America

**Received:** February 25, 2014; **Accepted:** September 18, 2014; **Published:** October 21, 2014

**Copyright:** © 2014 Doñate-Macián, Perálvarez-Marín. This is an open-access article distributed under the terms of the Creative Commons Attribution License, which permits unrestricted use, distribution, and reproduction in any medium, provided the original author and source are credited.

**Funding:** The authors want to acknowledge the funding from Spanish Government Young Researcher Grant (MICINN-SAF2010-21385 to A.P.-M.), a Marie Curie International Outgoing Fellowship within the 7th European Community Framework Programme (PIOF-GA-2009-237120 to A.P.-M.), and a Predoctoral Fellowship from the Generalitat de Catalunya (2013FIB00251 to P.D.-M.). The funders had no role in study design, data collection and analysis, decision to publish, or preparation of the manuscript.

**Competing Interests:** The authors have declared that no competing interests exist.

\* Email: peralvarezmarin@gmail.com

## Introduction

TRP channel superfamily consists of a set polymodal non-selective oligomeric membrane cationic channels, with large cytoplasmic regulatory domains [1,2]. These channels are predicted to share a common tetrameric membrane topology around the formation of a pore in the membrane to allow the flux of cations, but there are several differential regulatory domains that allow/block the cation flux through the membrane [2]. These domains are very specialized, and follow an evolutionary pattern that has been reflected in the subfamily classification of the large TRP superfamily. The vanilloid subfamily (TRPV) in vertebrates consists of at least six members (TRPV1-6) [3]. From an evolutionary perspective, there are two subgroups within this subfamily, first, TRPV1-4 which are non-selective cation channels, and second, TRPV5 and TRPV6, which are calcium selective ion channels. Another classification identifies the TRPV1-4 subgroup as thermosensors in mammals: TRPV1 and TRPV2 act as noxious heat sensors ( $T > 43^{\circ}\text{C}$ ), and TRPV3 and TRPV4 as physiological temperature sensors.

Evolutionary studies on TRPV channels, have attempted to gain information on the evolution profile of the family [4,5], or on the identification of specific domains in TRPV1 [6]. Understanding how evolution drives specialization of functional and structural

domains has been and is a bioinformatics challenge [7,8], especially when the study focus is multi-domain oligomeric membrane proteins, such as TRP channels. When considering membrane proteins, one should take into account protein-protein and lipid-protein contacts, internal transmembrane polar clusters, etc. Evolution information derived from the primary sequence may provide important hints about how a membrane protein is integrated in its environment. Biologically significant positions in a protein can be inferred by identifying directional selection in comparison to neutral selection. Neutral selection indicates low evolutionary pressure and directional selection indicates high evolutionary pressure that can follow two ways: positive selection *versus* negative (purifying) selection events. Purifying selection acts towards function conservation, whereas positive selection argues for environment adaptation or species/tissue dependent function variability, thus selective pressure defines the evolutionary history of a protein. Some studies have used evolutionary constraints to provide general information, such as domain organization and spatial interaction, and even mapping the evolutionary constraints for automated modeling of membrane proteins [9–12]. However, to understand specific issues, such as topology, selective pressure on biologically significant residues, or domain conservation, a detailed study and characterization of the system of interest is required.

In this study, we provide a comprehensive depiction of the evolutionary profile of the non-selective cation channels from the TRPV subfamily, i.e. TRPV1, TRPV2, TRPV3, and TRPV4 channels. We analyze the global evolutionary selective pressure for TRPV1-4 channels and the selective pressure exerted on specific domains as a candidate force driving function differentiation.

## Results

### Identifying evolutionary traits among TRPV1-4 channels

To dissect the common evolutionary features among TRPV1-4 sequences, we carried out a computational phylogenetic analysis. First, we retrieved the different sequences for TRPVs available in public databases. We also inspected specific genomes to get the complete protein sequence from some fragment TRPV sequences available in the UNIPROT database [13]. All the protein sequences used in this study are available as Dataset S1. Specifically, from the UNIPROT and NCBI databases (2011) we could curate the TRPV1 full sequence for: *Equus caballus*, *Salmo salar*, *Monodelphis domestica*, *Sarcophilus harrisi* and *Tutorius furo*; and the TRPV2 full sequence for: *Tursiops truncatus*, *Dipodomys ordii* and *Gasterosteus aculeatus*.

With all sequences available, we performed the multiple sequence alignment (MSA) that depicted a phylogenetic tree (Fig. 1A). This tree revealed a clear distribution of the channels within the corresponding evolutionary distribution in four defined groups. To provide a more illustrative depiction (Fig. 1B), we clustered the sequences using principal component analysis in JalView [14]. Some TRPV2 fragment sequences (*Melopsittacus undulatus* and *Anolis carolinensis*) were clustered in the TRPV1 subgroup (Fig. 1A). TRPV3 and TRPV4 clusters were clearly identified (Fig. 1B) and originated from the divergent node that defines the fish TRPV1/2 cluster (Fig. 1A).

### TRPVs evolutionary pressure

Using a subset of TRPV channels sequences we compared the conservation distribution for TRPV1 (25 sequences), TRPV2 (28 sequences), TRPV3 (21 sequences), and TRPV4 (22 sequences). We used the directional selection algorithm (FADE) of the HyPhy package [15,16] to analyze the MSAs for each channel and detect differences in the substitution rate as a rough indicator of positive selection among TRPVs (Table 1). The substitution rate in sequences for vertebrates was TRPV2>TRPV1>TRPV4>TRPV3, however, TRPV4 has a higher number of sites under positive selection (177, Table 1), i.e. positive selected residues compared to the other TRPVs. In the case of mammalian sequences, the substitution rate was TRPV2>TRPV1>TRPV3>TRPV4, and TRPV2 is the channel with higher number of residues under positive selection, whereas TRPV4 shows a strong purifying selective pressure in mammals. To measure the variability within each channel set of sequences we computed the pairwise distances among all sequences for a specific channel and represented them in box plots for divergence frequency distribution (Fig. 1C). We compared all available sequences for each channel depicting the sequence variability in the vertebrate subset (Fig. 1C). The level of sequence divergence among species was highest for TRPV2 (median at 0.34), followed by TRPV4 (0.20), TRPV1 (0.14), and the least divergent is TRPV3 (0.13). There was a bias on the number of sequences available for TRPV channels in the databases depending on the phylogenetic group, where mammals are the most represented. In Fig. 1D, we show the sequence variability for each channel only considering mammals information. Although at lesser extent, the level of sequence divergence was still highest for TRPV2 (median at 0.19),

followed by TRPV1 (0.12), TRPV3 (0.11) and TRPV4 (0.04). Results for sequence divergence in Fig. 1C and Fig. 1D agree reasonably well with the directional selection analysis of the MSAs carried out in HyPhy (Table 1).

To determine whether divergence variance among TRPVs could fit into any of these directional evolutionary pressure hypothesis, we performed a pairwise statistical analysis. Divergence among mammals and vertebrates TRPVs was not the same (p-value  $<2.2 \cdot 10^{-16}$ ). In mammals, divergence was extremely different between TRPV1-TRPV2, TRPV1-TRPV4, TRPV2-TRPV3, TRPV2-TRPV4 and TRPV3-TRPV4 (p-value  $<2.2 \cdot 10^{-16}$ ), while divergence between TRPV1-TRPV3 was less dissimilar (p-value = 0.003). In vertebrates, divergence was extremely different between TRPV1-TRPV2, TRPV2-TRPV3 and TRPV2-TRPV4 (p-value  $<2.2 \cdot 10^{-16}$ ), divergence was different between TRPV1-TRPV3 (p-value = 0.017) and there was no difference in divergence between TRPV1-TRPV4 and TRPV3-TRPV4 (p-value = 0.999).

In Fig. 2A we show the evolutionary pressure exerted on specific domains (box plot for each domain, Table 2 for the list of domains) for mammalian TRPVs compared to the median of the evolutionary pressure exerted on the full-length mammalian TRPV sequences (dashed line). A statistically significant difference in the divergence of a specific domain compared to the full-length sequence is indicated with an asterisk (Fig. 2A). For clarity, we provide an additional representation highlighting the differences between positive *versus* purifying evolutionary pressures exerted over the different TRPV domains for mammals as a comparison of medians (Fig. 2B). Defining as a zero level the median value for the full-length TRPV sequence, we provide a ratio to identify the median positive values as divergent, and negative values as conserved for specific protein domains when compared to the full-length sequence (see Methods section for details). We indicate with an arrow the domains that show statistical differences (divergence/conservation) for all channels derived from the information in Fig. 2A. Since the high-resolution partial structure of TRPV1 has been solved [17], we had the opportunity to map the conservation profiles for the different channels onto the 3D TRPV1 structure or onto models based on this structure (Fig. 3).

For TRPV1, the domains accounting for higher divergence than the full-length protein (positive selection) are the N-terminus, the 1<sup>st</sup> extracellular loop, the TM3, the 5<sup>th</sup> extracellular loop, the PIP2 binding domain and the distal C-terminus (Fig. 2A and Fig. 3). For TRPV2, the positive selection pressure is focused in the N-terminus, the 1<sup>st</sup> extracellular loop, the 5<sup>th</sup> extracellular loop, and the very distal C-terminus (Fig. 2A and Fig. 3). For TRPV3, which shows a high conservation profile, the positive selection pressure is focused in the first ankyrin repeat and in the 5<sup>th</sup> extracellular loop (Fig. 2A and Fig. 3). For TRPV4, the lowest selection pressure is focused in the N-terminus (Fig. 2A and Fig. 3). In TRPVs the positive evolutionary pressure is exerted on the N-terminus and the loop 5 (although is not statistically significant for all the channels, Fig. 2B), while purifying evolutionary pressure is exerted over the membrane proximal domain (MPD), the 2<sup>nd</sup> intracellular loop, the very short 3<sup>rd</sup> extracellular loop, the 4<sup>th</sup> transmembrane segment, the 4<sup>th</sup> intracellular loop, the 6<sup>th</sup> transmembrane segment, the TRP box linker (post TM6 segment) and the TRP box.

The TRPV1 structure and the TRPV2-4 models lack information on the N-terminus domain, the 5<sup>th</sup> extracellular loop and the very distal C-terminus domain. Strikingly, to obtain the high-resolution structure of TRPV1, the 5<sup>th</sup> extracellular loop (under positive selection) was removed from the sequence as part of the experimental design [17]. The very distal C-terminus domain of

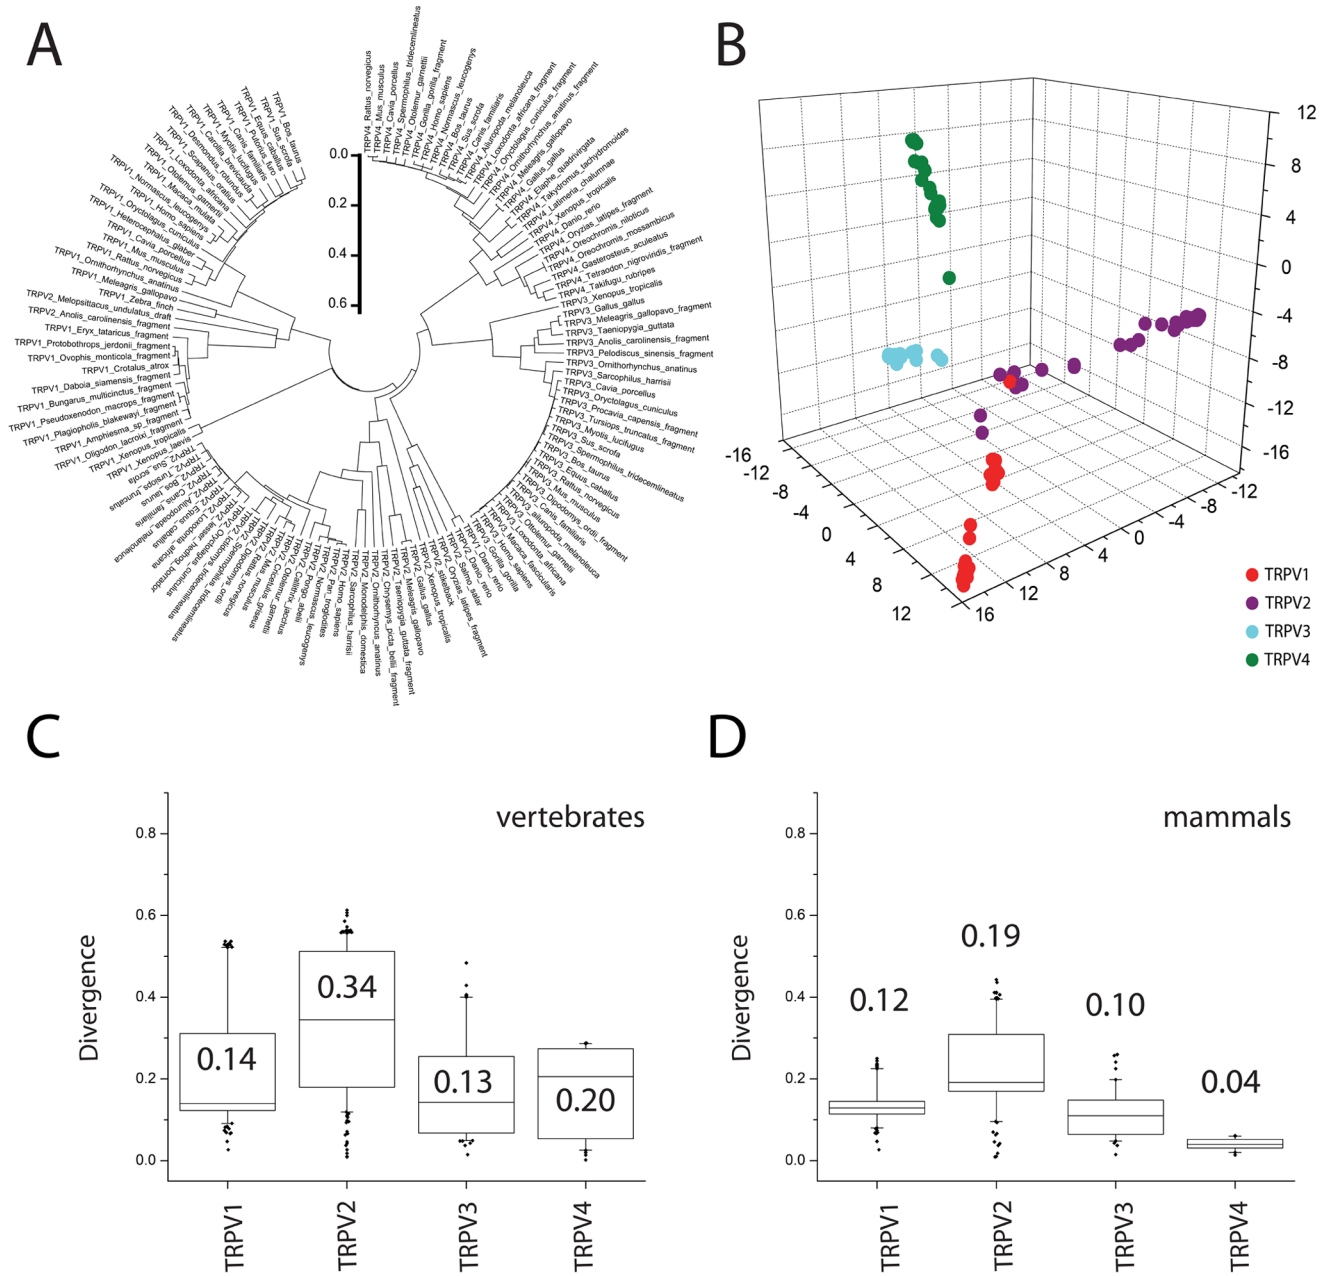

**Figure 1. TRPVs phylogeny.** **A.** Radial phylogenetic tree for TRPVs. The scale bar indicates evolutionary time in arbitrary units. **B.** Clustering by PCA analysis for TRPVs. Attending to their evolutive distances TRPV1-4 could be clustered into 4 subgroups corresponding to each of the four channels. **C.** Sequence divergence profile for vertebrate TRPVs. **D.** Sequence divergence profile for mammalian TRPVs. The box plots represent the divergence of sequences distribution for each channel. The median value is indicated for each box plot. Refer to the text for specific statistical comparison of the medians.  
doi:10.1371/journal.pone.0110715.g001

TRPV1 (also under positive selection) was not solved, probably because of protein proteolysis, indicating that these domains are not crucial in the TRPV scaffold.

### The transmembrane domain

The main oligomerization contacts for TRPV channels happen in the transmembrane domain (TMD). The contacts between the different subunits along the TM1-TM6 define the four-fold symmetry, the ion pore, and the selectivity filter. To map evolutionary traits on the TMD we have used EVcouplings [18] using the rat TRPV1 sequence as reference to compare the

evolutionary constraints with the TRPV1 tridimensional structure. We have analyzed the evolutionary constraints (EC) on the TMD and the overlapping of the ECs (color dots) and the actual contacts (grey shaded area) in the tridimensional structure (Fig. 4A, Table S1 for a full set of ECs). The cloud of ECs is more disperse than the contacts defined by the tridimensional structure, indicating that the evolutionary traits in TRPV channels not only define the physical contacts. In Fig. 4B we have classified the ECs within the TMD domain. The TM5-TM6 region shows the highest number of ECs, followed by the TM2-loop 2 region. The TM1 and TM3 regions showed a similar number of ECs. To discriminate the

**Table 1.** Evolutionary analysis of TRPV1-4 channels for directional positive selection based on multiple sequence alignments.

|                                 | Vertebrates |       |       |       |
|---------------------------------|-------------|-------|-------|-------|
|                                 | TRPV1       | TRPV2 | TRPV3 | TRPV4 |
| substitution/site               | 4.49        | 8.57  | 2.43  | 3.21  |
| residues in alignment           | 964         | 915   | 829   | 906   |
| sequences                       | 25          | 28    | 21    | 22    |
| sites under positive selection* | 100         | 158   | 69    | 177   |
|                                 | Mammals     |       |       |       |
|                                 | TRPV1       | TRPV2 | TRPV3 | TRPV4 |
| substitution/site               | 1.88        | 3.66  | 1.19  | 0.33  |
| residues in alignment           | 875         | 821   | 811   | 872   |
| sequences                       | 20          | 22    | 18    | 11    |
| sites under positive selection* | 72          | 106   | 37    | 13    |

\*considering as significant the top 5% sites in the FADE analysis (0.95 posterior filter).  
doi:10.1371/journal.pone.0110715.t001

residues involved in monomer-to-monomer contacts, we have mapped the subunit A (inter-chain) contacts from the PDB file (3J5P) in Fig. 4C. The contacts between chain A and B and chain A and chain C, are the same (in black and grey respectively). However, the contacts between chain A and chain D (open circles) are fewer and are located in the pore-forming region. Assuming four-fold symmetry, these contacts are equally defined for all subunit interactions (Table S2 for the full set of contacts for the TRPV1 TMD structure). The distribution of the inter-chain contacts corresponds to the TM1–TM5, TM4–TM5, TM4–TM6, TM5–TM6 and TM6–TM6 segments. The segments showing higher number of contacts are between TM4–TM5 and TM6–TM6 segments.

### Cytosolic domains

Recently the high-resolution structure for rat TRPV1 has been solved providing relevant tridimensional information [17]. The structure provides an exceptional illustration of intra-domain interaction, showing the interaction between the MPD and the TRP box depicted in Fig. 5A. Significantly, these two regions are highly conserved among all TRPVs, and not only within a TRPV isoform (Fig. 2 and 3), indicating a common molecular mechanism (Fig. 5A). From the tridimensional perspective, the membrane proximal region of the MPD domain acts as a fork where the TRP box slides during the gating mechanism. Considering the residue conservation (Fig. 5B and C) this seems to be a highly conserved mechanism among vertebrate TRPV1-4 channels. The MPD domain has been studied for TRPV1 and TRPV2, as a potential thermosensing module [19]. From the conservation perspective, biophysical features arise (Fig. 5B) such as the high consensus conservation of positive residues (R/K/H) close to conserved aromatic residues prone to partitioning at the water-membrane interface and promote protein-membrane interactions, thus acting as a lipid-binding domain. In this domain there are at least four highly conserved S/T/Y residues potentially phosphorylated (score over 0.5 by NetPhos algorithm [20]) indicating regulatory sites.

The C-terminus domain, comprising residues after TM6 until the end of the sequence, do not show the same level of conservation among channels as the N-terminus. Nevertheless, the C-terminal region of TRPV1 is one of the most characterized

and some information can be cross-related among the different TRPV channels (Fig. 5C). TRPV1 contains two tubulin-binding sequences (TBS1 and TBS2). TBS1 falls within a TRPV1-4 rich positive-residue conserved region, whereas TBS2 is within a very low conservation region (TBS in Fig. 5C) [6,21]. TRPV4 has been shown to bind microtubule-associated protein 7 in the last ~60 C-terminal residues [22]. The tetramerization domains (TAD) are present in all TRPVs, overlapping with the highly conserved TRP box within the TRP domain [23,24]. Derived from the recent structural information, the TRP domain has a tight relationship with the MPD. Concerning the PIP2 binding domain although initially described for TRPV1 [25], it was later described for TRPV2 [26] within the C-terminus. Due to the level of conservation of this region (which also includes the TRP box) and focusing on the conserved aromatic and positively-charged residues, the PIP2 domain may be easily defined for TRPV3 and TRPV4 as well [27].

Another protein-protein interaction region defined in TRPV1 is the one for the binding of AKAP79 protein [28], which can be easily translated into TRPV2, TRPV3 and TRPV4 because of the consensus sequence conservation (Fig. 5C). Finally, in Fig. 5C a gap appears in the middle of the highly conserved TRP box hallmark (IWKLQR consensus), indicating that one should be cautious about the poor quality of some non-reviewed sequences (outliers in Fig. 1C and D), which may introduce artifacts in the MSA.

### Discussion

Experimental structural data is essential for the understanding of membrane proteins' molecular mechanisms. Bioinformatics provides tools to depict some functional/structural details using evolutionary information in the absence of structural data. Considering TRP channels as the subject for a bioinformatics approach represents a major challenge because the large number of protein members and the diverse functions. Here we have restricted our analysis to the TRPV1-4 evolutionary subset of TRP channels to gain structural insight into the multidomain organization and conservation of these channels. In addition, we have taken advantage on the recently solved structure for TRPV1 to validate specific evolutionary traits [17].

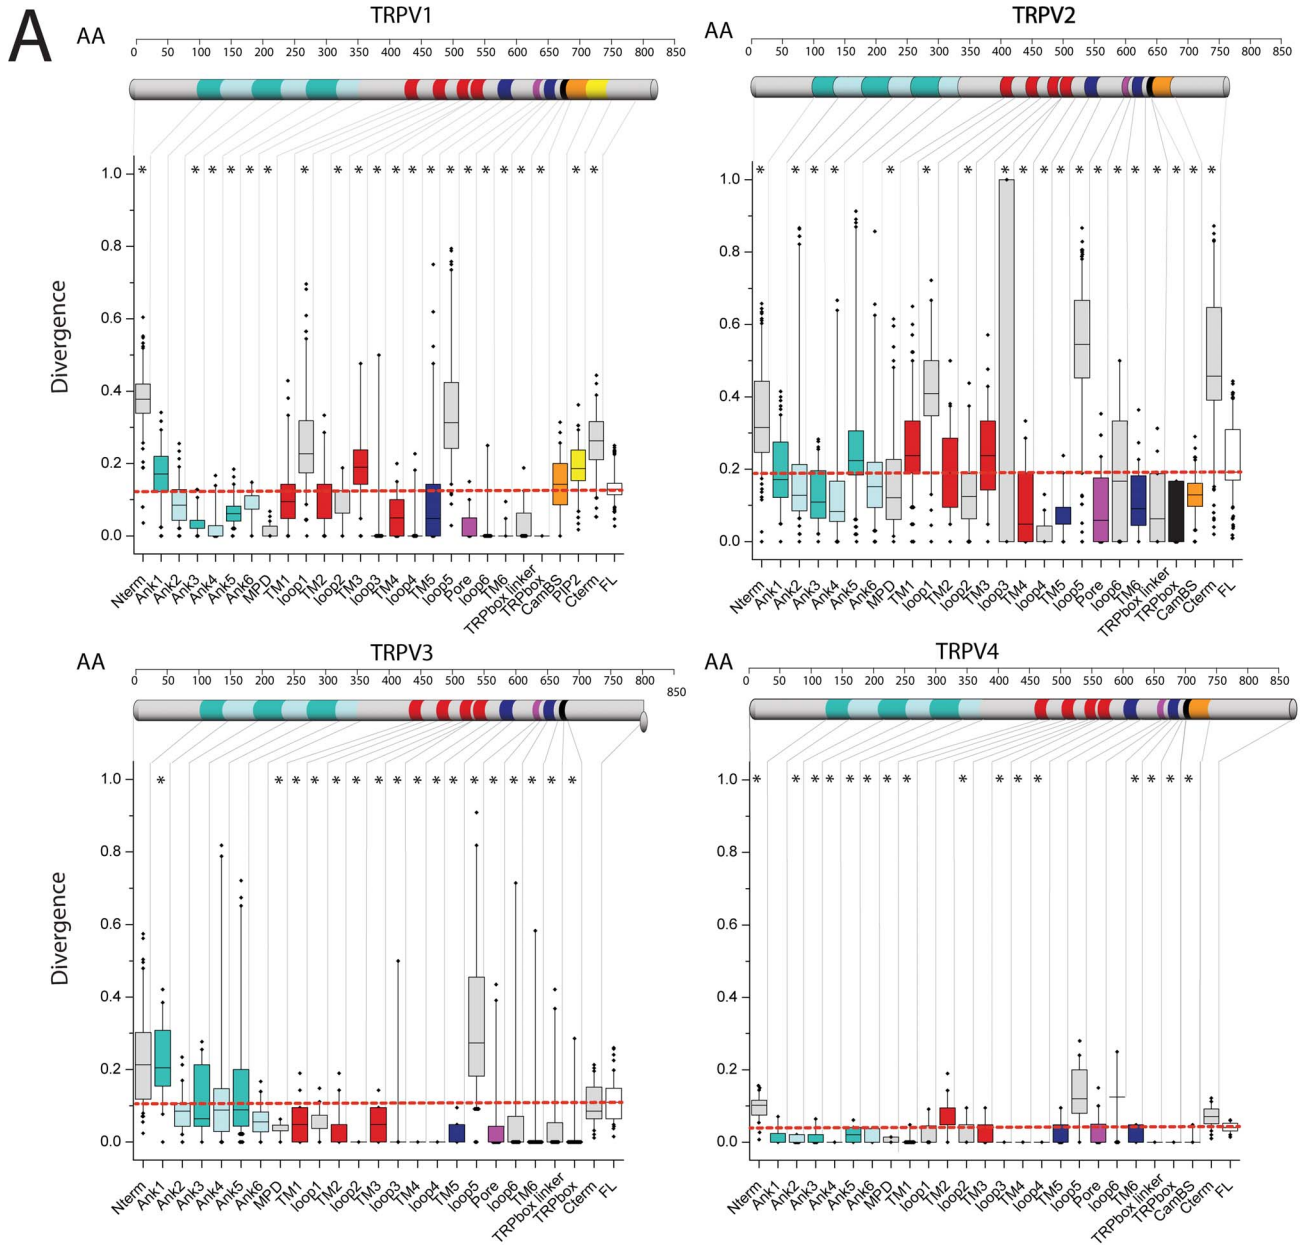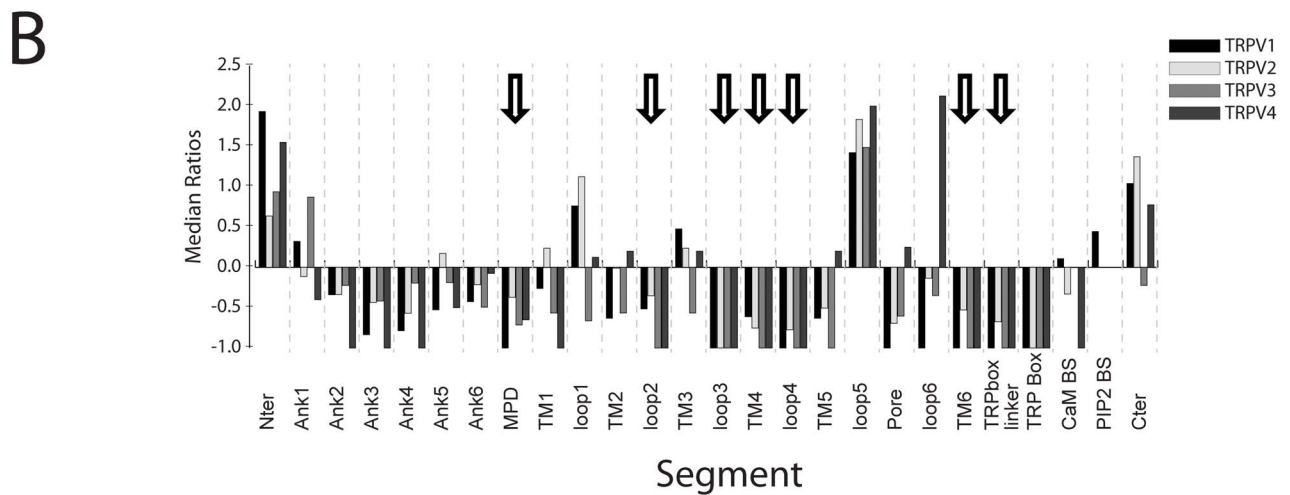

**Figure 2. Domain-specific conservation profile for TRPV channels. A.** Box plots showing the sequence divergence for specific domains of TRPV1-4 channels. The domain topology for the channels is indicated as a cartoon bar. The color-coding for each domain in the cartoon bar is represented in the box plot coloring. **B.** Plot of the normalized ratio for the medians for each domain segment. The Y-axis indicates the conservation (negative values) or divergence (positive values) of the domain in respect to the full-length protein conservation (value 0). doi:10.1371/journal.pone.0110715.g002

Considering the evolution time and sequence divergence parameters (Fig. 1), we can estimate the rate of evolutionary pressure. The purifying evolutionary pressure on TRPV1, TRPV3, and TRPV4 sequences is higher than on TRPV2 sequences, which are more divergent, either comparing mammals or vertebrates. Considering pressure across taxonomy, the highest purifying pressure has been exerted over TRPV4, although at very similar levels to TRPV1 and TRPV3. TRPV2 selective pressure indicates the possibility that TRPV2 channels are under positive selection, compared to TRPV1, TRPV3 and TRPV4. Another interesting hypothesis is that TRPV2 appeared as gene duplication from TRPV1 and positive selection on TRPV2 acts towards defining new physiological roles; thus, both channels (TRPV1 and TRPV2) may still have redundant roles on specific tissues/organisms. This hypothesis fits with the chromosome location of TRPV1, TRPV2 and TRPV3 in human (Chr17) and mouse (Chr11) for example, that indicates that a TRPV gene duplicated first originating TRPV2, and a more recent gene duplication

generated the ancestor of TRPV1 and TRPV3 genes [29]. TRPV4 is located in chromosomes 12 and 5 in human and mouse, respectively, indicating an earlier/distinct genetic variation events.

TRPV1-4 subset is represented in the tree of life starting from teleosts [5] (Fig. 1), although representative TRPV ancestors are found in *Caenorhabditis elegans* and in *Drosophila melanogaster* [5,30–32]. The late onset of these channels on the evolutionary tree of life argues for a very specific function requirement. Our analysis indicates that regions such as the distal N-terminus, some extracellular loops (such as the loop 5), and the distal C-terminus of TRPV1-4 channels are highly divergent, probably under positive selection, and very specific for each one of the channels. The purifying evolutionary pressure trend on specific domains, such as ARD, MPD, TMD and TRP domain (TRP box linker and TRP box) indicates that TRPV1-4 channels share a common minimal functional scaffold unit, comprising the ARD to the TRP domain, which corresponds to solved the high resolution tridimensional structure [17].

**Table 2.** Segment definition for human TRPV1-4 channels based on UNIPROT details\*.

| Segment             | hTRPV1  | hTRPV2  | hTRPV3  | hTRPV4  |
|---------------------|---------|---------|---------|---------|
| <b>Nterm</b>        | 1–110   | 1–71    | 1–116   | 1–147   |
| <b>Ank1*</b>        | 111–153 | 72–114  | 117–166 | 148–189 |
| <b>Ank2*</b>        | 154–200 | 115–161 | 167–213 | 190–236 |
| <b>Ank3*</b>        | 201–247 | 162–207 | 214–260 | 237–282 |
| <b>Ank4*</b>        | 248–283 | 208–243 | 261–295 | 283–319 |
| <b>Ank5*</b>        | 284–332 | 244–292 | 296–338 | 320–367 |
| <b>Ank6*</b>        | 333–359 | 293–319 | 339–366 | 368–395 |
| <b>MPD</b>          | 360–433 | 320–390 | 367–439 | 396–465 |
| <b>TM1</b>          | 434–454 | 391–411 | 440–460 | 466–486 |
| <b>loop1</b>        | 455–476 | 412–434 | 461–487 | 487–508 |
| <b>TM2</b>          | 477–497 | 435–455 | 488–508 | 509–529 |
| <b>loop2</b>        | 498–513 | 456–471 | 509–523 | 530–550 |
| <b>TM3</b>          | 514–534 | 472–492 | 524–544 | 551–571 |
| <b>loop3</b>        | 535     | 493     | 545     | 572     |
| <b>TM4</b>          | 536–556 | 494–514 | 546–566 | 573–593 |
| <b>loop4</b>        | 557–579 | 515–537 | 567–589 | 594–616 |
| <b>TM5</b>          | 580–600 | 538–558 | 590–610 | 617–637 |
| <b>loop5</b>        | 601–635 | 559–595 | 611–621 | 638–662 |
| <b>pore</b>         | 636–647 | 596–609 | 622–641 | 663–682 |
| <b>loop6</b>        | 648–659 | 610–621 | 642–649 | 683–690 |
| <b>TM6</b>          | 660–680 | 622–642 | 650–670 | 691–711 |
| <b>C-loop</b>       | 681–696 | 643–654 | 671–690 | 712–731 |
| <b>TRPbox</b>       | 697–702 | 659–664 | 691–697 | 732–738 |
| <b>Cam BS</b>       | 768–802 | 655–686 |         | 812–831 |
| <b>PIP2</b>         | 778–793 |         |         |         |
| <b>Cterm</b>        | 803–839 | 687–764 | 698–790 | 832–871 |
| <b>Total length</b> | 839     | 764     | 790     | 871     |

\*Ankyrin repeats were defined according to the crystal structure.

doi:10.1371/journal.pone.0110715.t002

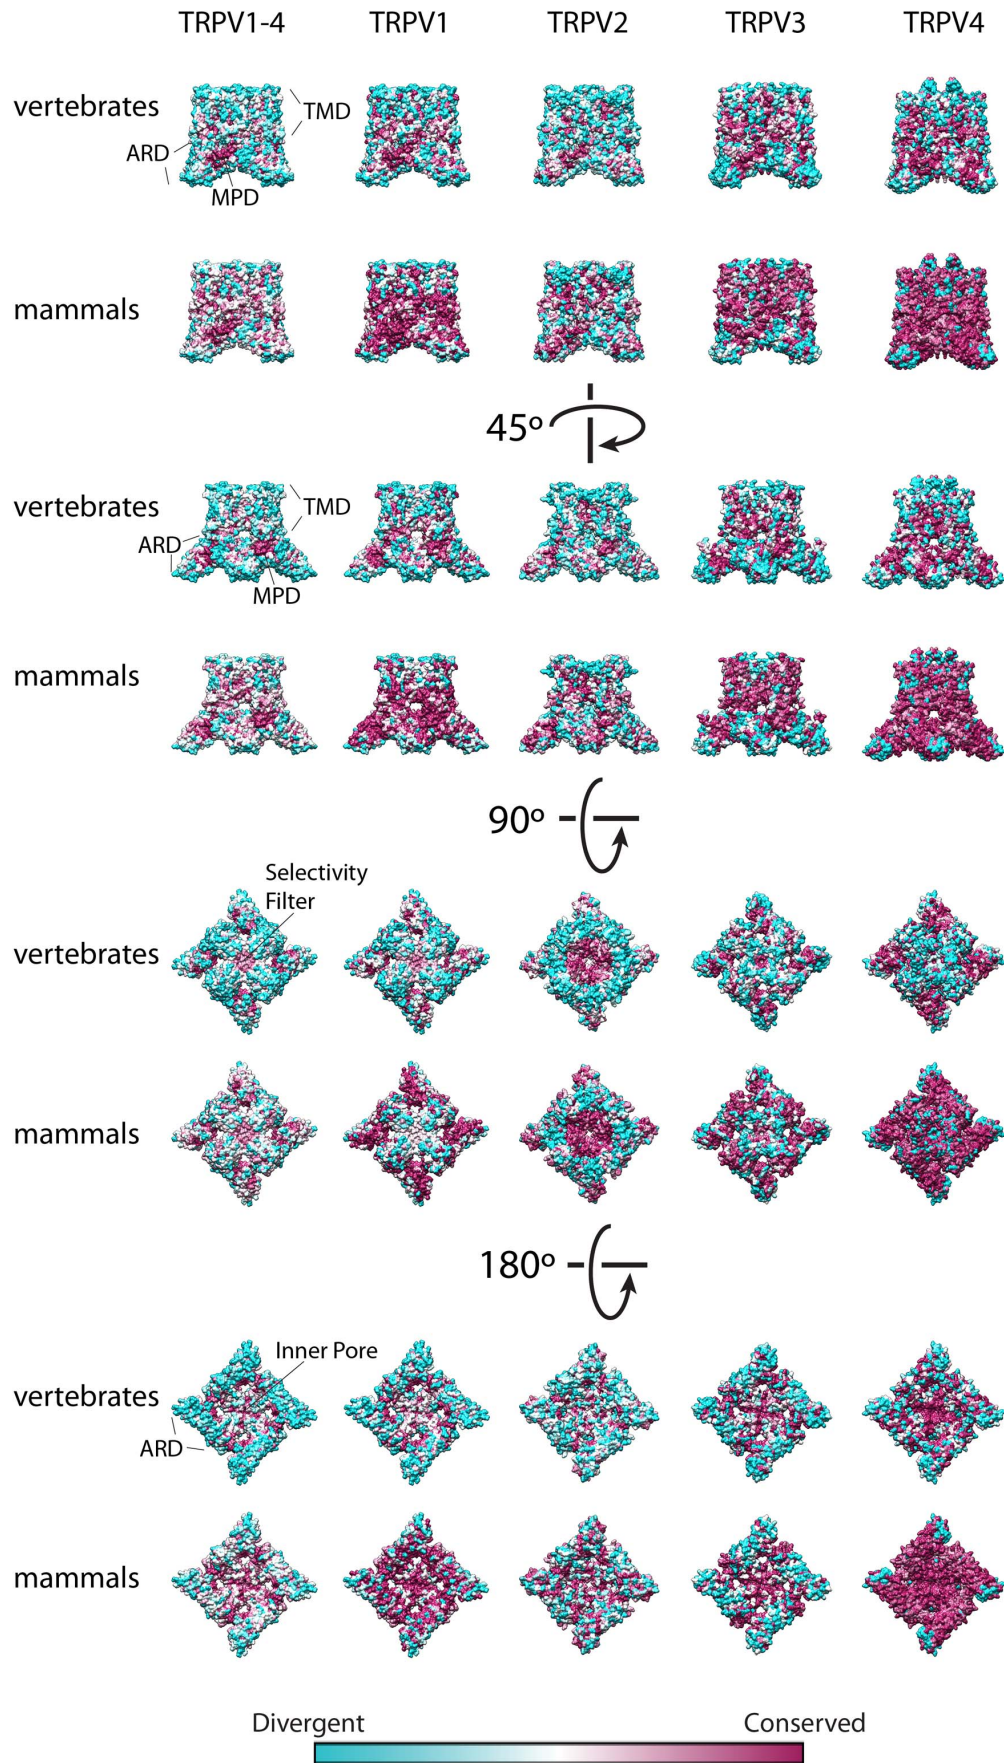

**Figure 3. Tridimensional Conservation plots for TRPV1-4 comparing vertebrate and mammalian sequences.** Conservation degree for each amino acid position was plotted on the solved structure for TRPV1 (pdb code 3J5P) for the MSAs for TRPV1-4 and TRPV1. For the conservation plot of TRPV2, TRPV3 and TRPV4 homology models were built based on the coordinates of TRPV1 (pdb code 3J5P). The conservation ranges from cyan (divergent) to magenta (conserved). Specific domains are indicated: TMD, transmembrane domain; ARD, ankyrin repeat domain; MPD, membrane proximal domain.  
doi:10.1371/journal.pone.0110715.g003

We have taken special consideration into the TMD of these channels, mainly because the channel gating that allows the cation flux through the pore, but also because the conservation profile of this domain will provide hints about homo/heteromer contacts, transmembrane topology and ligand binding. To get structural insight into the TMD we have analyzed the TMD residual coevolution pattern. Taken altogether, the evolutionary pressure on TM4–TM6 region is the highest, while the ECs in the TM1–TM3 region are not so represented (Fig. 4B). The evolution profile

correlates with the inter-chain structure contacts: most of the inter-chain contacts in the TMD are located in the TM4–TM6 region, with the exception of the TM1–TM5 contacts (Fig. 4D). Analyzing the residues that may have co-evolved provides an interesting approach to understand the residues that may be in close vicinity. In the case of transmembrane proteins, the residual coevolution information can be cross-related to predict contacts between transmembrane segments involved in the folding/oligomerization of TRPV channels.

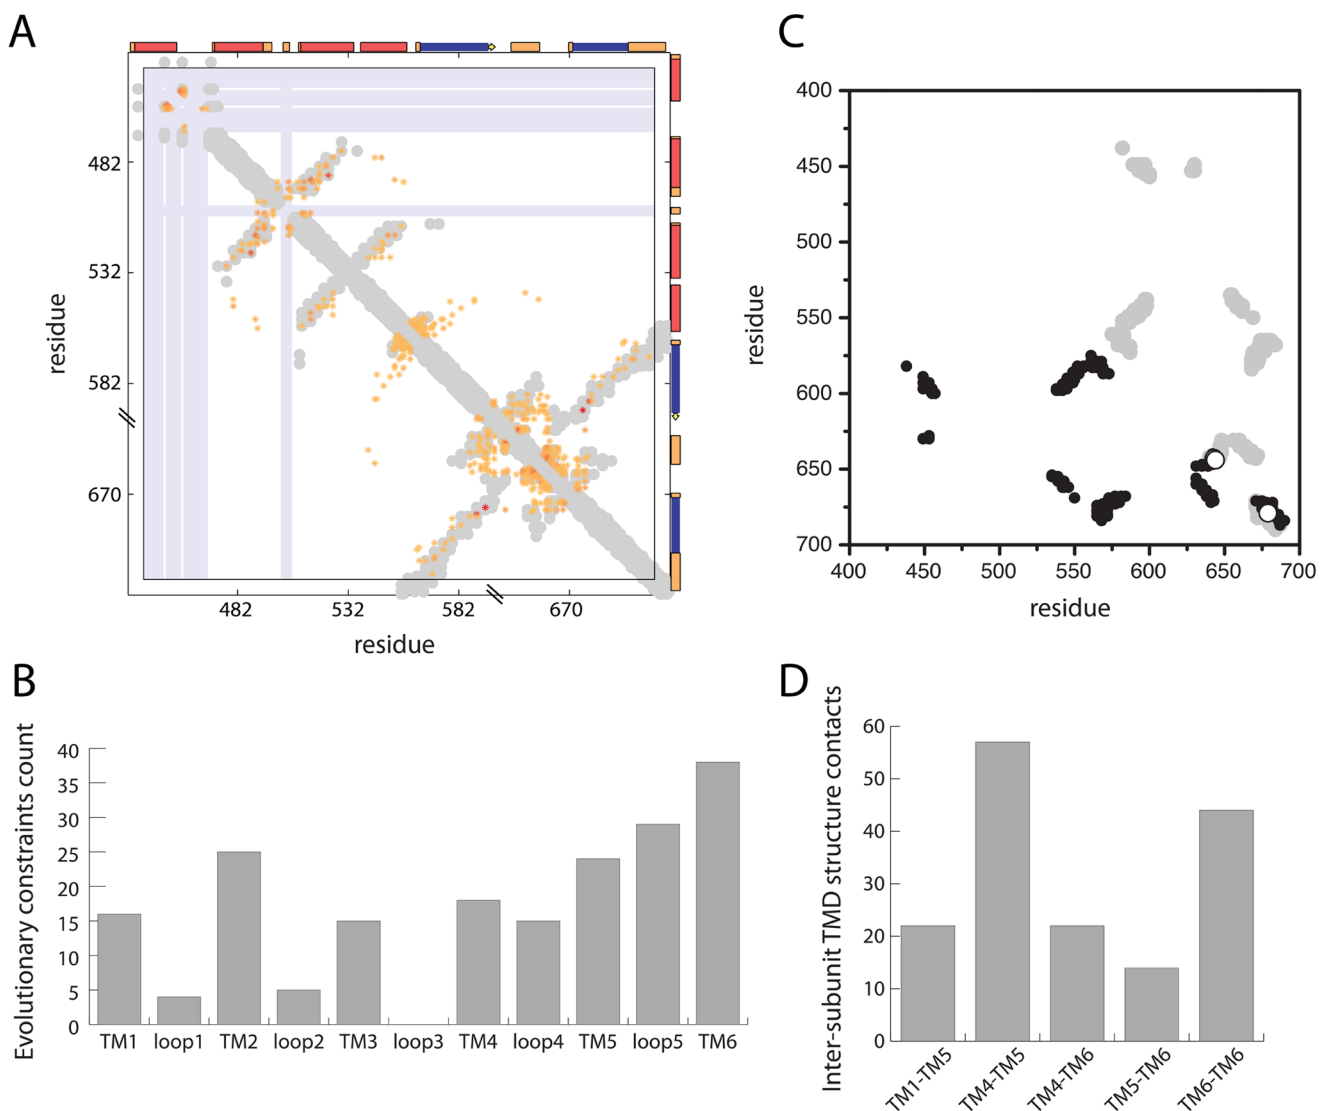

**Figure 4. Transmembrane domain analysis for TRPV1-4.** **A.** Evolutionary constraints heat map for the TMD of TRPVs using rat TRPV1 as reference sequence. The colored dots indicate the evolutionary constraints. The grey shaded area indicates the tridimensional structure contacts (3J5P). **B.** Histogram indicating the number of evolutionary constraints for each TMD region. **C.** Inter-chain structure contacts for chains A–B, black, for chains A–C, grey, and chains A–D, open circles. **D.** Histogram indicating the number of inter-chain structure contacts for chain A against chain B, C, and D between the indicated transmembrane segments.  
doi:10.1371/journal.pone.0110715.g004



A

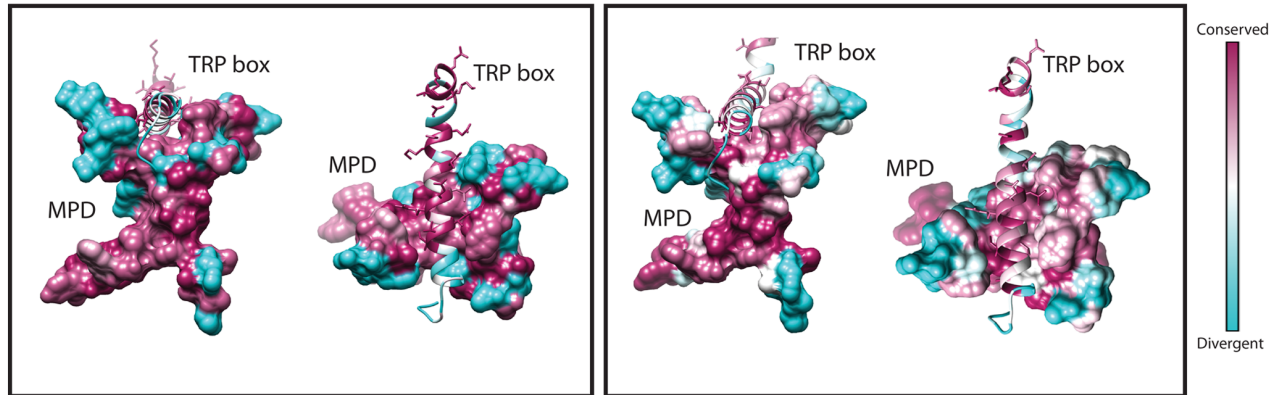

B

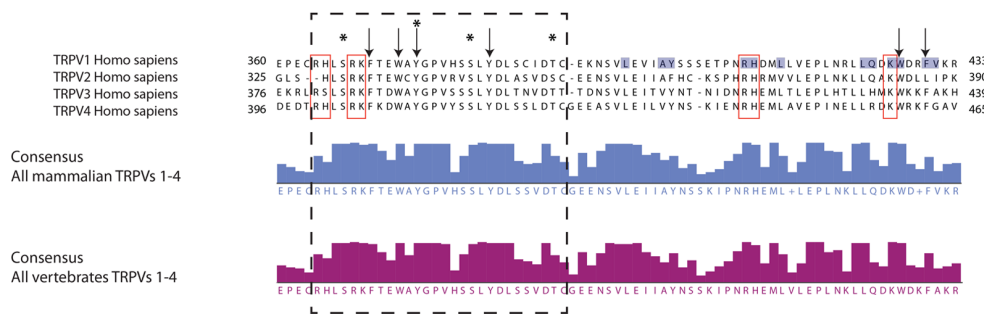

C

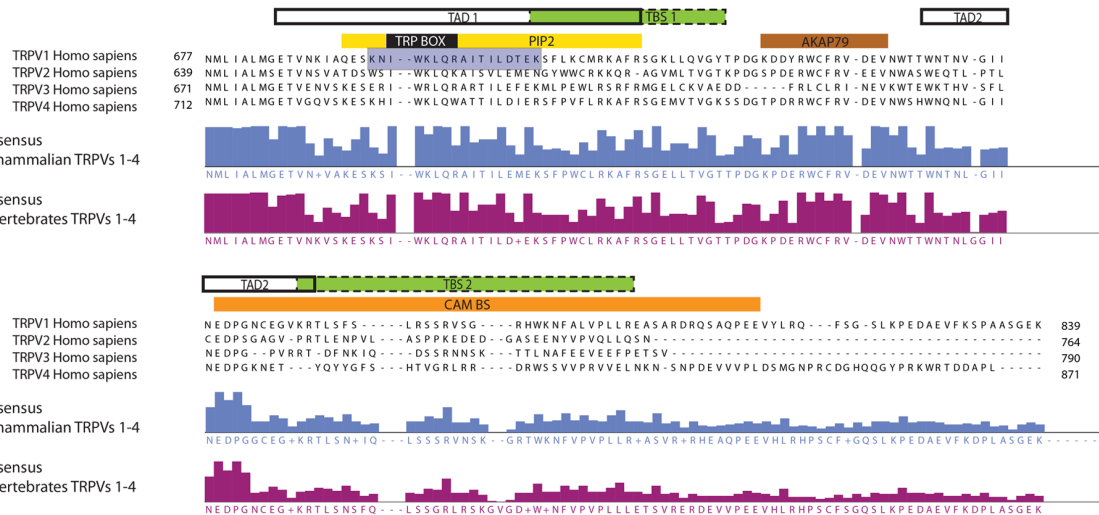

**Figure 5. Cytosolic domains of TRPV channels.** **A.** Conservation plot for the TRPV1 N-terminus (surface representation) and C-terminus (ribbon representation) interaction region. The residues involved in the MPD and TRP box interaction have been selected using a 5Å threshold. The specific residues are indicated in the alignments in Fig. 5B and 5C. The left plot represents the conservation scores obtained by ConSurf [46] for all TRPV1 sequences in this study. The plot in the right represents the conservation scores for the whole set of mammalian and vertebrate sequences used in this study. The black dashed line box delimits a conserved domain with predicted phosphorylation sites (asterisks, see text for details). Conserved residues are highlighted, positively charged residues are framed in red, and black arrows indicate aromatic residues. Shaded residues in the TRPV1 sequence represent the contacts between the MPD and the TRP box, represented in Fig. 5A. **B.** MSA for the membrane proximal domain of human TRPVs. The consensus sequence and the confidence score for the whole set of mammalian and vertebrate sequences are indicated. The black dashed line box delimits a conserved domain with predicted phosphorylation sites (asterisks, see text for details). Conserved residues are highlighted, positively charged residues are framed in red, and black arrows indicate aromatic residues. Shaded residues in the TRPV1 sequence represent the contacts between the MPD and the TRP box, represented in Fig. 5A. **C.** MSA of the C-terminal region from the human TRPV1-4 channels. Fragment showing the alignment of the C-terminal region from the human TRPV1-4 channels. The consensus sequence and the confidence score for the whole set of mammalian and vertebrate sequences are indicated. Specific structural/regulatory domains are indicated; TAD, tetramerization domain, commonly known as TRP domain; TBS, tubulin-binding sequence; PIP2, Phosphatidylinositol 4,5-bisphosphate binding sequence; AKAP79, CAM BS, calmodulin binding sequence. The alignments were plotted using JalView 2.8 [14]. Shaded residues in the TRPV1 sequence represent the contacts between the MPD and the TRP box, represented in Fig. 5A.

Using the primary sequence information we have delimited some conserved sequence determinants in the TRPV MPD domain that may be protein-protein and/or protein-lipid interaction modules (Fig. 5A and B). Although the MPD has been postulated to be the thermal sensing domain of the TRPV thermosensors [19], other roles for the MPD become evident, such as a lipid binding domain or a vesicle trafficking domain. Interestingly, the LKRSF consensus in the MPD sequence of TRPVs, with a highly likely phosphorylation serine site (Fig. 5) is also present near the coil domain of mammalian syntaxins 1,2, and 3, which also interact with the C2A domain of synaptotagmins [33]. The conserved LKRSF in TRPVs sequence is a predicted motif for PKC phosphorylation and it could be also involved in the regulation of syntaxin-binding proteins involved in vesicle-mediated transport. Vesicle trafficking may lead to translocation of TRPVs from internal membrane pools towards the plasma membrane, essential for TRPVs activity [34–36].

Similarly, the conservation of some functional features located in the C-terminus segment, allows the inference of domains such as the tetramerization, PIP2 binding and AKAP79 binding domains for all TRPVs 1–4 (Fig. 5C). It is noteworthy the importance of these domains for the correct assembly of the tetramer in the membrane, the gating and the regulation of the channel, respectively.

## Conclusions

Concerning TRPV1-4, we find that TRPV2 is under positive selection. The evolutionary pressure on specific domains is positive on the N-terminal and most extracellular loops, but negative in the ARD, TMD and the TRP domain. Taking advantage of the recently solved structure for TRPV1, we have been able to map specific evolutionary traits in the TMD that are relevant for the structure of the channel. We have also used the conservation profiles in the cytosolic domains to extrapolate functions of one channel to the rest, such as the AKAP interaction of TRPV1, the PIP2 binding of TRPV1 and TRPV2, etc.

From this study we find that evolutionary pressure is exerted differentially on different TRPVs but similarly on specific TRPV domains, arguing for a strong physiology/tissue-dependence/environment adaptability of these channels. From a methodological perspective, we provide a workflow for dissecting complex multidomain membrane proteins through their primary sequences, integrating and adapting state-of-the-art algorithms specifically for membrane proteins. In summary, our study highlights the relevance of evolutionary primary sequence analysis of membrane proteins towards predicting potential functional and structural sequence hallmarks, which may obviously require experimental validation.

## Materials and Methods

### Sequence retrieval and revision of draft sequences

We retrieved all the available sequences for TRPV1, TRPV2, TRPV3 and TRPV4 channels available from UNIPROT [13,37]. The complete sequences from UNIPROT were used without further modifications. The fragment sequences were used as primers in genome databases NCBI [38] and UCSC [39] by BLAST and BLAT algorithms, respectively. Sequences identified in genomes were completed and used for further analysis. The fragment sequences that could not be completed, either because the genomic region was not covered or because they were not found, were not modified and the original UNIPROT retrieved fragments were used. The total set of sequences consisted of:

TRPV1 (35 sequences), TRPV2 (35 sequences), TRPV3 (27 sequences), and TRPV4 (28 sequences). To avoid biased information, we used only the full-length sequences for the divergence analysis and conservation plots (Table 1 and Supplementary Information). Preliminary sequence analysis was carried out using the computational phylogenetics HyPhy software package [15]. To detect directional selection we performed a two-step process: first, we run the “Model Selection Tool” and the best model for our data was Jones-Taylor-Thornton (JTT). Second we performed a FAD analysis for each TRPV channel MSA (rooting the alignment in the *Homo sapiens* sequence) to detect sites under evolutionary directional positive selection (output in Table 1). As a measure of positive selection we chose the residues with a posterior confidence interval >0.95.

### Multiple sequence alignment

All the sequences were aligned using ClustalW algorithm with a gap opening penalty of 10 and a gap extension penalty of 0.1 [40]. For validation of the alignments, we have also used MAFFT alignments [41]; there were no major differences between the generated MSAs. We defined two subsets of MSAs, to discriminate between mammalian and vertebrate sequences for TRPV1, TRPV2, TRPV3 and TRPV4.

### Phylogenetic tree generation

Trees were generated by maximum likelihood algorithm (Nearest-Neighbour-interchange heuristic method). A JTT model with uniform rates was used to calculate amino acid substitutions. Bootstrapping method with 250 iterations was used to improve the phylogenetic tree confidence value.

### Box plot generation

Using the full protein or the specific segment MSAs we build a pairwise sequence divergence matrix in MEGA5.0. Considering one specific TRPV channel, all species sequences within the specific member were compared in a pairwise fashion obtaining a divergence matrix. Specifically, we applied a p-distance model, where the pairwise divergence among all the sequences in one TRPV member subset is calculated considering the number of substitutions per total number of residues considered (full length protein or specific segment). Any amino acid substitution is scored with equal distance (uniform rate), and alignment gaps are considered partial deletions sites and are removed from any calculations, i.e. sites present in all sequences are considered.

Medians of divergence in mammal and vertebrate TRPVs were compared with Kruskal-Wallis test. Divergence of each TRPV was compared with divergence of the other TRPVs using Wilcoxon rank sum test. p-values were adjusted for multiple comparisons using the Bonferroni correction and considered significant (\*) when p-value < 0.05. Statistical analysis was performed with R Statistical Package (Version 2.15.1) [42].

The sequences of human TRPV1, TRPV2, TRPV3 and TRPV4 were used as references for domain definition. MSAs were truncated into different segments attending to UNIPROT topology definition for the different transmembrane segments and functional domains. The ankyrin repeats were defined attending to the crystal structures already available [43–45]. The divergence matrices for specific segments were generated as previously indicated for the full-length sequences. The distances (divergence) within the box represent the first three quartiles and the line corresponds to the median (second quartile). The whiskers indicate the values within 1.5 times the interquartile range from the lowest and highest quartile, respectively. Diamonds represent outliers. For statistical analysis of the divergence of specific segments, we

used a Mann-Whitney comparison of two medians (segment *versus* full-length).

Boxplots were generated both for full sequences and for specific domains. We have used a normalized ratio of medians (Fig. 2B) to provide a qualitative comparison for the analysis of divergence between full-length sequences and specific domains, among the different channels:

$$(\text{Segment median} - \text{Full length median}) / (\text{Full length median}).$$

### Evolutionary constraints and conservation plots

To map residue and domain conservation on the specific domains, we used the ConSurf server [46] using the 3J5P TRPV1 structure as template. Evolutionary constraints of the TRPVs TMD domain were predicted using the EVcouplings server [18] and the inter-chain crystal contacts for rat TRPV1 structure, PDB code 3J5P [17] were analyzed using the contact map analysis tool from the SPACE suite [47].

### Tridimensional representations and modeling

All structural representations have been performed using UCSF Chimera [48]. The modeling of TRPV2, TRPV3, and TRPV4 in Figure 3 has been carried out using the MODELLER suite [49] included in UCSF Chimera.

## References

- Nilius B, Owsianik G (2011) The transient receptor potential family of ion channels. *Genome Biol* 12: 218.
- Ramsey IS, Delling M, Clapham DE (2006) An introduction to trp channels. *Annu Rev Physiol* 68: 619–647.
- Gunthorpe M, Benham C, Randall A (2002) The diversity in the vanilloid (TRPV) receptor family of ion channels. *Trends Pharmacol* 23: 183–191.
- Montell C (2001) Physiology, Phylogeny, and Functions of the TRP Superfamily of Cation Channels. *Sci STKE* 2001: 1re–1.
- Saito S, Shingai R (2006) Evolution of thermoTRP ion channel homologs in vertebrates. *Physiol Genomics* 27: 219–230.
- Sardar P, Kumar A, Bhandari A, Goswami C (2012) Conservation of Tubulin-Binding Sequences in TRPV1 throughout Evolution. *PLoS One* 7: e31448.
- Andrade MA, Sander C (1997) Bioinformatics: from genome data to biological knowledge. *Curr Opin Biotechnol*. 8 : 675–683.
- Edwards YJK, Cottage A (2003) Bioinformatics Methods to Predict Protein Structure and Function: A Practical Approach. *Mol Biotechnol* 23: 139–166.
- Arinaminpathy Y, Khurana E, Engelman DM, Gerstein MB (2009) Computational analysis of membrane proteins: the largest class of drug targets. *Drug Discov Today* 14: 1130–1135.
- Fuchs A, Martin-Galiano AJ, Kalman M, Fleishman S, Ben-Tal N, et al. (2007) Co-evolving residues in membrane proteins. *Bioinformatics* 23: 3312–3319.
- Gromiha MM, Ou Y-Y (2013) Bioinformatics approaches for functional annotation of membrane proteins. *Brief Bioinform*. in press.
- Lundstrom K (2006) Structural genomics for membrane proteins. *Cell Mol Life Sci* 63: 2597–2607.
- The UniProt Consortium (2014) Activities at the Universal Protein Resource (UniProt). *Nucleic Acids Res* 42: D191–198.
- Waterhouse AM, Procter JB, Martin DMA, Clamp M, Barton GJ (2009) Jalview Version 2—a multiple sequence alignment editor and analysis workbench. *Bioinformatics* 25: 1189–1191.
- Kosakovsky Pond SL, Frost SDW, Muse S V. (2005) HyPhy: Hypothesis testing using phylogenies. *Bioinformatics* 21: 676–679.
- Delpont W, Poon AFY, Frost SDW, Kosakovsky Pond SL (2010) Datamonkey 2010: A suite of phylogenetic analysis tools for evolutionary biology. *Bioinformatics* 26: 2455–2457.
- Liao M, Cao E, Julius D, Cheng Y (2013) Structure of the TRPV1 ion channel determined by electron cryo-microscopy. *Nature* 504: 107–112.
- Marks DS, Hopf TA, Sander C (2012) Protein structure prediction from sequence variation. *Nat Biotechnol* 30: 1072–1080.
- Yao J, Liu B, Qin F (2011) Modular thermal sensors in temperature-gated transient receptor potential (TRP) channels. *Proc Natl Acad Sci* 108: 11109–11114.
- Blom N, Gammeltoft S, Brunak S (1999) Sequence and structure-based prediction of eukaryotic protein phosphorylation sites. *J Mol Biol* 294: 1351–1362.
- Goswami C, Hucho TB, Hucho F (2007) Identification and characterisation of novel tubulin-binding motifs located within the C-terminus of TRPV1. *J Neurochem* 101: 250–262.
- Suzuki M, Hirao A, Mizuno A (2003) Microtubule-associated [corrected] protein 7 increases the membrane expression of transient receptor potential vanilloid 4 (TRPV4). *J Biol Chem* 278: 51448–51453.
- Becker D, Müller M, Leuner K, Jendrach M (2008) The C-terminal domain of TRPV4 is essential for plasma membrane localization. *Mol Membr Biol* 25: 139–151.
- García-Sanz N, Fernández-Carvajal A, Morenilla-Palao C, Planells-Cases R, Fajardo-Sánchez E, et al. (2004) Identification of a tetramerization domain in the C terminus of the vanilloid receptor. *J Neurosci* 24: 5307–5314.
- Prescott ED, Julius D (2003) A modular PIP2 binding site as a determinant of capsaicin receptor sensitivity. *Science* (80– ) 300: 1284–1288.
- Mercado J, Gordon-Shaag A, Zagotta WN, Gordon SE (2010) Ca<sup>2+</sup>-dependent desensitization of TRPV2 channels is mediated by hydrolysis of phosphatidylinositol 4,5-bisphosphate. *J Neurosci* 30: 13338–13347.
- Gambhir A, Hangyás-Mihályiné G, Zaitseva I, Calfiso DS, Wang J, et al. (2008) Electrostatic Sequestration of PIP2 on Phospholipid Membranes by Basic/Aromatic Regions of Proteins. *Biophys J* 86: 2188–2207.
- Fischer MJM, Btsh J, McNaughton PA (2013) Disrupting sensitization of transient receptor potential vanilloid subtype 1 inhibits inflammatory hyperalgesia. *J Neurosci* 33: 7407–7414.
- Abramowitz J, Birnbaumer L (2007) Know thy neighbor: a survey of diseases and complex syndromes that map to chromosomal regions encoding TRP channels. *Handb Exp Pharmacol*: 379–408.
- Gong Z, Son W, Chung YD, Kim J, Shin DW, et al. (2004) Two interdependent TRPV channel subunits, inactive and Nanchung, mediate hearing in *Drosophila*. *J Neurosci* 24: 9059–9066.
- Kim J, Chung YD, Park D-Y, Choi S, Shin DW, et al. (2003) A TRPV family ion channel required for hearing in *Drosophila*. *Nature* 424: 81–84.
- Sokolchik I, Tanabe T, Baldi PF, Sze JY (2005) Polymodal sensory function of the *Caenorhabditis elegans* OCR-2 channel arises from distinct intrinsic determinants within the protein and is selectively conserved in mammalian TRPV proteins. *J Neurosci* 25: 1015–1023.
- Shao X, Li C, Fernandez I, Zhang X, Südhof TC, et al. (1997) Synaptotagmin-syntaxin interaction: the C2 domain as a Ca<sup>2+</sup>-dependent electrostatic switch. *Neuron* 18: 133–142.
- Morenilla-Palao C, Planells-Cases R, García-Sanz N, Ferrer-Montiel A (2004) Regulated exocytosis contributes to protein kinase C potentiation of vanilloid receptor activity. *J Biol Chem* 279: 25665–25672.

## Supporting Information

**Table S1 Output file from the EVcouplings algorithm indicating the evolutionary constraints for rat TRPV1 transmembrane domain segment.**

(CSV)

**Table S2 Inter-chain structure contacts for chain A obtained for the rat TRPV1 transmembrane domain segment high-resolution structure (PDB code 3J5P).**

(CSV)

**Dataset S1 Full list of sequences used in this analysis.**

(PDF)

## Acknowledgments

We thank Dr. Mireia Olivella and Dr. Ute Hellmich for critical reading of the manuscript. The authors want to thank Dr. Irene R. Dégano for the assistance on the statistical analysis and on the preparation of the manuscript. The authors want to acknowledge the Generalitat de Catalunya for the recognition of the “Membrane Proteins Structural and Computational Biology Research Group” as an emerging research group (GRE 2014 SGR 1628).

## Author Contributions

Conceived and designed the experiments: PD-M AP-M. Performed the experiments: PD-M AP-M. Analyzed the data: PD-M AP-M. Contributed reagents/materials/analysis tools: AP-M. Wrote the paper: AP-M. Commented on and edited the manuscript: PD-M.

35. Nagasawa M, Nakagawa Y, Tanaka S, Kojima I (2007) Chemotactic peptide fMetLeuPhe induces translocation of the TRPV2 channel in macrophages. *J Cell Physiol* 210: 692–702.
36. Penna A, Juvin V, Chemin J, Compan V, Monet M, et al. (2006) PI3-kinase promotes TRPV2 activity independently of channel translocation to the plasma membrane. *Cell Calcium* 39: 495–507.
37. Consortium U (2013) Update on activities at the Universal Protein Resource (UniProt) in 2013. *Nucleic Acids Res* 41: D43–47.
38. Benson DA, Karsch-Mizrachi I, Lipman DJ, Ostell J, Wheeler DL (2005) GenBank. *Nucleic Acids Res* 33: D34–38.
39. Dreszer TR, Karolchik D, Zweig AS, Hinrichs AS, Raney BJ, et al. (2012) The UCSC Genome Browser database: extensions and updates 2011. *Nucleic Acids Res* 40: D918–923.
40. Larkin MA, Blackshields G, Brown NP, Chenna R, McGettigan PA, et al. (2007) Clustal W and Clustal X version 2.0. *Bioinformatics* 23: 2947–2948.
41. Katoh K, Misawa K, Kuma K ichi, Miyata T (2002) MAFFT: a novel method for rapid multiple sequence alignment based on fast Fourier transform. *Nucleic Acids Res* 30: 3059–3066.
42. Team RDC (2008) R: A Language and Environment for Statistical Computing. R Foundation for Statistical Computing, Vienna, Austria. ISBN 3–900051–07–0.
43. Inada H, Procko E, Sotomayor M, Gaudet R (2012) Structural and biochemical consequences of disease-causing mutations in the ankyrin repeat domain of the human TRPV4 channel. *Biochemistry* 51: 6195–6206.
44. Jin X, Touhey J, Gaudet R (2006) Structure of the N-terminal ankyrin repeat domain of the TRPV2 ion channel. *J Biol Chem* 281: 25006–25010.
45. Lishko P V, Procko E, Jin X, Phelps CB, Gaudet R (2007) The ankyrin repeats of TRPV1 bind multiple ligands and modulate channel sensitivity. *Neuron* 54: 905–918.
46. Ashkenazy H, Erez E, Martz E, Pupko T, Ben-Tal N (2010) ConSurf 2010: calculating evolutionary conservation in sequence and structure of proteins and nucleic acids. *Nucleic Acids Res* 38: W529–533.
47. Sobolev V, Eyal E, Gerzon S, Potapov V, Babor M, et al. (2005) SPACE: a suite of tools for protein structure prediction and analysis based on complementarity and environment. *Nucleic Acids Res* 33: W39–43.
48. Pettersen EF, Goddard TD, Huang CC, Couch GS, Greenblatt DM, et al. (2004) UCSF Chimera—a visualization system for exploratory research and analysis. *J Comput Chem* 25: 1605–1612.
49. Fiser A, Sali A (2003) Modeller: generation and refinement of homology-based protein structure models. *Guid to Yeast Genet Funct Genomics, Proteomics, Other Syst Anal* 374: 461–491.
