# Supplementary material for: Dissecting Domain-Specific Evolutionary Pressure Profiles of Transient Receptor Potential Vanilloid Subfamily Members 1 to 4
Source: PubMed Central journal article supplement (PMC4204936; doi:10.1371/journal.pone.0110715), 2014-10-21
Supplement: pone.0110715.s003.pdf [file pone.0110715.s003.pdf]

>TRPV1\_Rattus\_norvegicus

MEQRASLDSEESPPQENSCLDPPDRDPNCKPPPVKPHIFTTRSRTLFGKGDSEAS  
PLDCPYEEGGLASCPITVSSVLTIQRPDGPASVRPSSQDSVSAGEKPPRLYDRRSIFDA  
VAQSNQCQELSLPFLQRSKKRLTDSEFKDPETGKTCLLKAMLNHLHGQNDTIALLLD  
VARKTDSLKQFVNASYTDSYYKGQTALHIAIERRNMTLVTLLEVENGADVQAAANGDF  
FKKTKGRPGFYFGELPLSLAACTNQLAIVKFLQNSWQPADISARDSVGNLVLHALVE  
VADNTVDNTKFTVSMYNEILILGAKLHPTLKLEEITNRKGLTPLALAASSGKIGVLAYIL  
QREIHEPECRHLSRKFTWAYGPVHSSLYDLSCIDTCEKNSVLEVIAYSSSETPNRHDM  
LLVEPLNRLQDKWDRFVKRIFYFNFFVYCLYMIIFTAAAYYRPVEGLPPYKLNKNTVG  
DYFRVTGEILSVGGVYFFFRGIQYFLQRRPSLKSFLVDSYSEILFFVQSLFMLVSVVLYF  
SQRKEYVASMVFLAMGWTNMLYYTRGFQQMGIYAVMIEKMILRDLCRFMFVYLVFL  
FGFSTAVVTLIEDGKNSLPMESTPHKCRGSACKPGNSYNSLYSTCLELFKFTIGMGDL  
EFTENYDFKAVFIILLAYVILTYILLNMLIALMGETVNKIAQESKNIWKLQRAITILDT  
EKSFLKCMRKAFRSGKLLQVGFTPDGKDDYRWCFRVDEVNWTWNTNVGIINEDPG  
NCEGVKRTLSFSLRSGRVSGRNWKNFALVPLLRDASTRDRHATQQEEVQLKHYTGSL  
KPEDAIEVFKDSMVPGEK-----  
-----

>TRPV1\_Sus\_scrofa

MKKWESLDAGESQQDSSPHPQDGDPTLRPAPAKPHAFPAVESHSQRFKGDSEASL  
VGCSYEEGQLASCPAITVSPVVIIQKPGDGPCTCARQPSQDSVDSSENFKLYDRKKIFEAVA  
QNNCEALESLLLFLQSKKHLVDSEFKDPETGKTCLLKAMLNHLHGQNETIPLLEIA  
RQTDSLKELVNASYTDSYYKGQTALHIAIERRNMALVTLLVENGADVQAAANGDFFK  
KTKGRPGFYFGELPLSLAACTNQLGIVKFLQNSWHPADISARDSVGNLVLHALVEVA  
DNTADNTKFTVSMYNEILILGARLHPTLKLEELTNKKGLTPLALAAKSGKIGVLAYILQ  
REIQEPECRHLSRKFTWAYGPVHSSLYDLSCIDTCEKNSVLEVIAYSSSETPNRHDM  
LVEPLNRLQDKWDRFVKRIFYFNFLVYCLYMIIFTAAAYYRPTEGLPPFKLNHTVGD  
YFRVIGEILSVGGIYLFGRGIQYFLQRRPSLKTFLVDSYSEMLFFVQSLFMLGTVVLYFC  
HRKEYVASMVFLAMGWANMLYYTRGFQQMGIYAVMIEKMILRDLCRFMFVYLVFL  
FGFSTAVVTLIEDGKNSVSTEVFHKCRGLVCRSPDSSYNSLYSTCLELFKFTIGMGDL  
FTENYDFKAVFIILLAYVILTYILLNMLIALMGETVNKISQESKNIWKLQRAITILDT  
KSFLKCMRKVFRSGKLLQVGYTPDGKDDYRWCFRVDEVNWTWNTNVGIINEDPGN  
CEGIKRTLSFSLRSSRVAGRNWKNFALVPLLRDASTRERHLAQPPEVHLKHIAKSLKP  
EDAEIVKDP-----  
-----

>TRPV1\_Bos\_taurus

MKKWGSSSESRESQDLPQEDSCPDLGDPNYRPAPTKPHSFPTAKSRSLFGKGDSE  
DTSLMDCSYEEGQLASCPAITISPVVIIQRSGDGPCTCVRQLSQDSAATENLKYDRRKIF  
EAVAQNNCEELESLLLFLQSKKHLMDSEFKDPETGKTCLLKAMLNHLHGQNDTIPL  
LLEIARQTDSLKELVNASYTDSYYKGQTALHIAIERRNMALVTLLVENGANVQAAANG  
DFFKKTKGRPGFYFGELPLSLAACTNQLGIVKFLQNSWQPADISARDSVGNLVLHAL  
VEVADNTADNTKFTVSMYNEILILGAKIHPTLKLEELTNKKGLTPLALAAARGKIGVLA  
YILQREIQEPECRHLSRKFTWAYGPVHSSLYDLSCIDTCEKNSVLEVIAYSSSETPNRH  
DMLLVEPLNRLQDKWDRFVKRIFYFNFFVYCLYMIIFTTVAYYRPAGGRPPFKPKHT  
VG DYFRITGEIISVAGGIYFFSRGIQYFLQRRPSLKTFLVDSYSEMLFFMQSLFMLATVV

LYFCHRKEYVASMVFLAMGWTNMLYYTRGFQQMGIYAVMIEKMILRDLCRFMFVYL  
VFLFGFSTAVVTLIEDEKNDSSVVELSQHRWRGHGCRSADSNSLYSTCLELFKFTIGM  
GDLEFTENYDFKAVFVILLAYVILTYILLNMLIALMGETVNKIAQESKNIWKLQRAIT  
ILDTEKSFLKCMRKAFRSGKLLQVGYTPDGKDDYRWCFRVDEVNWTTWNTNVGIIN  
EDPGNCEGIKRTLSFSLRSSRVAGRWNKNFALVPLLRDASTRERHPAQPEEVHLRHFT  
GSLKPEDAIEIINDSVALGK-----  
-----

>TRPV1\_Canis\_familiaris

MKNWGSDDSGGEDPPQEDSCLDPLDGDPNRVPVPAKPHIFPTAKSRSLFGKCDSEE  
ASMDCSYEEGQLASCPAIVSPVVMIPKHEDGPTCARQPSQDSVTAGSEKSLKLYDRR  
KIFEAVAQNNCEELQSLLLFLQSKKHLMDSEFKDPETGKTCLLKAMLNLHDGQNDTI  
PLLEIARQTDSLKELVNASYTDSYYKGQTALHIAIERRNMALVTLLEVENGADVQAAA  
NGDFFKKTGKRPGFYFGELPLSLAACTNQLGIVKFLQNSWQPADISARDSVGNTVLH  
ALVEVADNTADNTKFVTSMYNEILILGAKLHPTLKLEGLTNKKGLTPLALAARSGKIG  
VLAYILQREIQEPECRHLSRKFTWAYGPVHSSLYDLSCIDTCEKNSVLEVIAYSSSETP  
NRHDMLLVEPLNRLQDKWDRFVKRIFYNFFIYCLYMIIFTTAAAYRPPVDGLPPYKL  
KHTVGDYFRVTGEILSVLGGVYFFFRGIQYFLQRRPSLKTFLVDSYSEMLFFVQSLFML  
GTVVLYFCHHKEYVASMVFLAMGWTNMLYYTRGFQQMGIYAVMIEKMILRDLCRF  
MFVYLVFLFGFSTAVVTLIEDGKNNSVPTESLHRWRGPGCRPPDSSNSLYSTCLELF  
KFTIGMGDLEFTENYDFKAVFIILLAYVILTYILLNMLIALMGETVNKIAQESKNIWK  
LQRAITILDTEKSFLKCMRKAFRSGKLLQVGYTPDGKDDYRWCFRVDEVNWTTWNT  
NVGIINEDPGNCEGIKRTLSFSLRSGRVSGRNWKNFSLVPLLRDASTRERHPAQPEEV  
HLRHFAAGSLKPEDAIEIFKDPVGLGK-----  
-----

>TRPV1\_Cavia\_porcellus

MKKRASVDSKESEDPPQEDYSLDPLDVDANSKTPPAKPHTFSVSKSRNRLFGKSDLEE  
SSPIDCSFREGEAASCPTITVSSVVTSPRPADGPTSTRQLTQDSIPTSAEKPLKLYDRRSI  
FDAVAQNNCQDLDSLPLFLQSKKRLTDETFKDPETGKTCLLKAMLNLHNGQNDTIS  
LLLDIARQTNSLKEFVNASYTDSYYRGQTALHIAIERRNMVLTLLLEVENGADVQAAAN  
GDFKKTGKRPGFYFGELPLSLAACTNQLAIVKFLQNSWQPADISARDSVGNTVLHA  
LVEVADNTADNTKFVTSMYNEILILGAKLYPTLKLEELTNKKGFTPLALAASSGKIGVL  
AYILQREIPEPECRHLSRKFTWAYGPVHSSLYDLSCIDTCEKNSVLEVIAYSSSETPNR  
HDMLLVEPLNRLQDKWDRFVKRIFYNFFIYCLYMIIFTMAAYRPPVDGLPPYKMKM  
TVGDYFRVTGEILSVIGGFHFFFRGIQYFLQRRPSVKTLFVDSYSEILFFVQSLFLLASV  
LYFSHRKEYVACMVFLALGWTNMLYYTRGFQQMGIYAVMIEKMILRDLCRFMFVYL  
VFLFGFSTAVVTLIEDGKNESLSAEPHRWRGPGCRSAKNSNSLYSTCLELFKFTIGMG  
DLEFTENYDFKAVFIILLAYVILTYILLNMLIALMGETVNKIAQESKNIWKLQRAITIL  
DTEKSFLKCMRKAFRSGKLLQVGYTPDGKDDYRWCFRVDEVNWTTWNTNVGIINED  
PGNCEGVKRTLSFSLRSGRVSGRNWKNFALVPLLRDASTRDRHSAQPEEVHLKHFGSGS  
LKPEDAIEVFKDSAVPGEK-----  
-----

>TRPV1\_Desmondus\_rotundus

MKKRGSSDSGESEDLPQEDSLPDLGPNHRSRPAKSNILMAKRRRRLFGKGDSEEA  
SPQDCSYKEGHPASCPAIVSPVLTQKTEDGPTCTWQLCQDSVPAGTKKCLKLYDRR  
KIFEAVAQNNCEELESLLLFLQKSKKHLMDREFKDPETGKTCLLKAMLNLHNGQNNT  
IPLLEIARQTDSLKELVNASYTDSYYKGQTALHIAIERRNMALVTLLVENGADVQAAA  
NGDFFKKTGKRPGFYFGELPLSLAACTNQLGIVKFLQNSWQPADISARDSVGNTVLH  
ALVEVADNTADNTKFVTSMYNEILILGAKLHPTLKLEELINKKGLTPLALAASSGKIGV  
LAYILQREIHEPECRYLSRKFTWAYGPVHSSLYDLSCIDTCEKNSVLEVIAYSSNETPN  
RHDMLLVEPLNRLQLDKWDRFVKRIFYFNFFVYCLYMIIFTTVAYYRPVEGLPPYKVK  
HTVGDYFRVIGEILSVLGGVYFFFRGIQYFLQRRPSLKSFLVDSYSEILFFVQSLFMLGTV  
VLYFCQCKEYVASMVFLAMGWTNMLYYTRGFQQMGIYAVMIEKMILRDLCRFMFVY  
LVFLFGFSTAVVTLIEDGKNDSVSTETTPHRWRGPCYRSPDSSYNSLYSTCLELFKFTIG  
MGDLEFTENYDFKAVFIILLAYVILTYILLNMLIALMGETVNKIAQESKNIWKLQRAI  
TILDEKSFLKCMRKAFRSGKLLQVGYTPDGKDDYRWCFRVDEVNWTWNTNVGII  
NEDPGNCEGIKRTLSFSLRSSRVAGRNWKNFALVPLLRASTRERQPAQPEEVHLKHF  
SGSLKPEDAXVFKDSAALGESEKGESTV-----  
-----

>TRPV1\_Equus\_caballus

MKKWGSDDSGDSEDLPQEDSCDPDQDGPDPFRPPPAKPPIFPVTKSHSQLFGKCGLVE  
ASSTDCSYEEGHPASCPAIVSPVVIIQRPGDGPICRQPSQDSVTSQAQKDLYDRRKIF  
EAVAQNNCEELENLLFFLQKSKKHLMDSEFKDPETGKTCLLKAMLNLHDGNDTIPLL  
LEIARQTDSLKELVNASYTDSYYKGQTALHIAIERRNMTLVTLLVENGADVQAAAANGD  
FFKKTGKRPGFYFGELPLSLAACTNQLGIVKFLQNSWQPADISARDSVGNVSLHALVE  
VADNTADNTKFVTSMYNEILILGAKLHPTLKLEELTNKKGLTPLALAAGSGKIGVLAYI  
LQREIRDPECRHLSRKFTWAYGPVHSSLYDLSCIDTWEKNSVLEVIAYSSSETPNRQD  
MLLVEPLNRLQLDKWDRFVKRIFYFNFFVYCLYMIIFTTVAYYRPVDGLPPFKLNTVG  
DYFRVTGEILSVSGGVYFFFRGIQYFLQRRPSLKTFLVDSYSEMLFFVQSLFMLGTVVLY  
FCHCKEYVASMVFLAMGWTNMLYYTRGFQQMGIYAVMIEKMILRDLCRFMFVYLVF  
LFGFSTAVVTLIEDGKNDSVLAESTSHRWRGHGCRSPDSSYNSLYSTCLELFKFTIGMG  
DLEFTENYDFKAVFIILLAYVILTYILLNMLIALMGETVNKISQESKNIWKLQRAITIL  
DTEKSFLKIRKAFRSGKLLQVGYTPDGKDDYRWCFRVDEVNWTWNTNVGIINEDP  
GNCEDIKRTLSFSLRSGRVSGRNWKNFSLAPLLREASVRERHPAPPEEVNLRHFAGSL  
KPEDAEICKDPAASGEK-----  
-----

>TRPV1\_Heterocephalus\_glaber

MKKWASIDSRESEHPPQEEDSSLDPPDTDANSKTPPAKPHIFSVSRSRTRFLFGKGDSE  
ELSPMDCSYEEGEPVSCPTITVSSVISPRPGDGPTCARQLSQDSIPASAEKPLKLYDRR  
SIFDAVAQNNCQELDSLPLFLKSKKRLTDTEFKDPETGKTCLLKAMLNLHNGQNNTI  
SLLLDIAQETDSLREFVNASYTDSYYKGQTALHIAIERRNMALVTLLVENGADVQAAA  
NGDFFKKTGKRPGFYFGELPLSLAACTNQLAIVKFLQNSWQPADISARDSVGNTVLH  
ALVEVADNTADNTKFVTSMYNDILILGAKLYPTLKLEEITNKKGFTPLALAASSGKIGV  
LAYILQREIPEPECRHLSRKFTWAYGPVHSSLYDLSCIDTCEKNSVLEVIAYSSSETPN  
RHDMLLVEPLNRLQLDKWDRFVKRIFYFNFFIYCLYMIIFTTAAYYRPVDGLPPYKVK  
NTVEDYFRVTGEILSVTGGVYFFFRGIQYFLQRRPTMKTFLVDSYSEILFFVQSLFMLVS  
VVLYFSHRKEYVASMVFLALGWTNMLYYTRGFQQMGIYAVMIEKMILRDLRRFMFV  
YLVFLFGFSTAVVTLIEDGKNDSLPIESHRWRGPCRTSSNSYNSLYSTCLELFKFTIGM

GDLEFTENYDFKAVFIILLLAYVILTYILLNMLIALMGETVNKIAQESKNIWKLQRAITI  
LDTEKSFLKCMRKAFRSGKLLQVGYTPDGKDDYRWCFRVDEVNWTTWNTNVGIINE  
DPGNCEGVKRTLSFSLRSGRVSGRNWKNFALVPLLRDASTRDRHSSHPDEVHLKHFS  
GSLKPEDA EVFKDSVAPGEK-----  
-----

>TRPV1\_Scapanus\_oratius

MKKWGNSDAGESEDPPQEDSCPEPLDEDPNFRPALVKSHFFPTAKSR SRLFGKCDSE  
EASPMDCSYEEGELSSCPAIVTSPAVVTQRPDGPACARQLFQNCVPGAKKNLKYD  
RRKIFEAVAQNNCEELESLLLFLQKSKKHLMDSEFKDPETGKTCLLKAMLNLHDGQN  
DTIPLLEIARQTDSLREFVNASYTDSYYKGQTALHIAIERRNMPLVTLVENGADVQA  
AANGDFFKKTGRPGFYFGELPLSLAACTNQLGIVKFLQNSWQPADISARDSVGNTV  
LHALVEVADNTAENTKFVTSMYSEILILGARLHPTLKEELTNKKGLTPLALAAKSGKI  
GVLAYILQREIQEPECRHLSRKFTWAYGVPVHSSLYDLSCIDTCEKNSVLEVIAYSSSET  
PNRHDMLLVEPLNRLQDKWDRFVKRIFYFNFFVYCLYMIIFTTAAAYRPVEGLPPYK  
MNHTVADYFRVTGEILSVSGGVYFFFRGIQYFLQRRPSLKTFLVDSYSEMLFFVQSLFM  
LGTVALYF SHRKEYVASMVFLAMGWTNMLYYTRGFQMGYAVMIEKMILRDLCRF  
MFVYLVFLFGFSTAVVTLIEDGKNNSVQAE LISHRWRGPNCRQPDSSYNSLYSTCLELF  
KFTIGMGDLEFTENYDFKAVFIILLLAYVILTYILLNMLIALMGETVNKIAQESKNIWK  
LQRAITILDTEKSFLKCMRKAFRSGKLLQVGYTPDGKDDYRWCFRVDEVNWTTWNT  
NVGIINEDPGNCEGIKRTLSFSLRSGRVSGRNWKNFTLVPLLRDASTRERHPAQPEEV  
HLRHFAGSLKPEDA EVFKDPAAFGEK-----  
-----

>TRPV1\_Homo\_sapiens

MKKWSSTDLGAAADPLQKDTCPDPLDGDPNRPPPAKPQLSTAKSRTRLFGKGDSEE  
AFPVDCPHEEGELDSCPTITVSPVITIQRPDGP TGARLLSQDSVAASTEKTLRLYDRRS  
IFEAVAQNNCQDLESLLLFLQKSKKHLTDNEFKDPETGKTCLLKAMLNLHDGQNTTIP  
LLEIARQTDSLKELVNASYTDSYYKGQTALHIAIERRNMALVTLVENGADVQAAAH  
GDFKKTGRPGFYFGELPLSLAACTNQLGIVKFLQNSWQTADISARDSVGNTVLHA  
LVEVADNTADNTKFVTSMYNEILMLGAKLHPTLKEELTNKKGMTPLALAAAGTGKIG  
VLAYILQREIQEPECRHLSRKFTWAYGVPVHSSLYDLSCIDTCEKNSVLEVIAYSSSETP  
NRHDMLLVEPLNRLQDKWDRFVKRIFYFNFLVYCLYMIIFTMAAYRPVDGLPPFK  
MEKTGDYFRVTGEILSVLGGVYFFFRGIQYFLQRRPSMKTFLVDSYSEMLFFLQSLFML  
ATVVLYF SHLKEYVASMVFLALGWTNMLYYTRGFQMGYAVMIEKMILRDLCRFM  
FVYIVFLFGFSTAVVTLIEDGKNDSL PSESTSHRWRGPACRPPDSSYNSLYSTCLELFKF  
TIGMGDLEFTENYDFKAVFIILLLAYVILTYILLNMLIALMGETVNKIAQESKNIWKLQ  
RAITILDTEKSFLKCMRKAFRSGKLLQVGYTPDGKDDYRWCFRVDEVNWTTWNTNV  
GIINEDPGNCEGVKRTLSFSLRSSRVSGRHWNFALVPLLREASARDRQSAQPEEVYLR  
QFSGSLKPEDA EVFKSPAASGEK-----  
-----

>TRPV1\_Putorius\_furo

MKKWGSSDSGKAEDPSQEDSCPDPLDGDPNRSAPAKPHFFPTAKSR SRLFGKCDSE  
EASPMDCSYEEQLASCPAIVNPNVVIQRHEDGPTCARQLSQDSVTAGSEKSLKLYDR  
RKIFEAVAQNNCEELQSLLLFLQRSKKHLMDSEFKDPETGKTCLLKAMLNLHEGQND

TIPLLEIARQTDSLKELVNASYTDSYYKGQTALHIAIERRNMALVTLLVENGADVQAA  
ANGDFFKKTGRPGFYFGELPLSLAACTNQLGIVKFLQNSWQPADISAKDSVGNVTL  
HALVEVADNTADNTKFVTSMYNEILILGAKLHPTLKEELTNKKGLTPLALAARTGKI  
GVLAYILQREIQEPECRHLSRKFTWAYGVPVHSSLYDLSCIDTCEKNSVLEVIAYSSSET  
PNRHDMMLLEPLNRLQDKWDRFVKRIFYFNFFVYCLYMIIFTTAAAYRVPDGLPPYK  
LKHTIGDYFRVTGEILSVSGGVYFFFRGIQYFLQRRPSLKTFLVDSYSEMLFFVQSLFML  
GTVVLYFCHHKEYVASMVFLAMGWTNMLYYTRGFQQMGIYAVMIEKMILRDLCRF  
MFVYLVFLFGFSTATTILKSTSGKSLGLDTSMLMGGPAPTGPGRQQPSLGRSGLEGLS  
LECAPAKLQKRHERSCSGALGLGLERLILEAPLTARGSPGISPLPRAITILDTEKSFLKC  
MRKAFRSGKLLQVGYPDGKDDYRWCFRVDEVNWTWNTNVGIINEDPGNCEGIKR  
TSLFSLWSGRGEA-----  
-----  
-----

>TRPV1\_Loxodonta\_africana

MKKWNSSDLGKSEDPPEATCPHSPDDDPDSKPPPTEPQIFMAKSRPRLFGKGDSEE  
ASQVSHVHCSYEEGELAYCPAIVSPAVIIKRPDGPACARQLSQDSVTAGTTKKTLYD  
RRRIFDAVAQNDCCELASLLLFLQKSKKHLMDCEFKDPETGKTCLLKAMLNLHDGQN  
DTIPLLEIARQTDSLKELVNASYTDSYYKGQTALHIAIERRNMALVTLLVENGADVQA  
AANGDFFKKIKGRPGFYFGELPLSLAACTNQLGIVKFLQNSWQPADISARDSMGNTV  
LHALVEVADNTDNTKFVTSMYNDILILGAKLHPKLKEELTNKKGLTPLALAASSGKI  
GVLAYILQREIQEPECRHLSRKFTWAYGVPVHSSLYDLSCIDTCEKNSVLEVIAYSSSET  
PNRHDMMLLEPLNRLQDKWDRFVKRIFYFNFFIYCLYMIIFTMAAYNRPGDGLPPFK  
VNNTEDYFRVTGETLSVSGGVYFFFRGIQYFLQRRPSIKSLFVDSYSEILFFVQSIFMLGT  
VVLYFSHRKEYVASMVFLAMGWTNMLYYTRGFQQMGIYAVMIEKMILRDLCRFMF  
VYVFLFGFSTAVVTLIEGNKKPAAAEPTSHRWRGCCRPPDNYSLYSTCLELKFKT  
IGMGDLEFTENYEFKAVFIILLAYVILTYILLNMLIALMGETVNKIAQESKNIWKLQR  
AITILDTEKSFLKCMRKAFRSGKLLQVGYPDGKDDYRWCFRVDEVNWTWNTNVGI  
INEDPGYCKGVKRTLSFSLRPNKVSGRNWKNFGLVPLLRDASTRERPAPQPEDVHLK  
HFAGSLKPEDA EVFRD SAAFREK-----  
-----  
-----

>TRPV1\_Macaca\_mulatta

MKKWSSTDSGAAADPLQQDACPDPPDGPNSRPPPAKPQLSTAKSRTRLFGKGDSEE  
AFLVDCPHEEGELASCPTITVSPVITIQRPGDGPTGARLPSQDSVATSTERTLRLYDRRS  
IFEAVAQNNCQDLESLLLFLQKSEKHLTDNEFKDPETGKTCLLKAMLNLHDGQNDTIP  
LLEIARQTGSLKEFVNASYTDSYYKGQTALHIAIERRNMGLVTLLVENGADVQAAAN  
GDFKKTGRPGFYFGELPLSLAACTNQLGIVKFLQNSWQPADISARDSVGNVTLHA  
LVEVADNTADNTKFVTSMYNEILILGAKLHPTLKEELTNKKGMTPLALAAGTGKIGV  
LAYILQREIQEPECRHLSRKFTWAYGVPVHSSLYDLSCIDTCEKNSVLEVIAYSSSETPN  
RHDMLLEPLNRLQDKWDRFVKRTFYFNFLVYCLYMIIFTTAAAYRVPDGLPPFKM  
EKTEDYFRVTGEILSVLGGVYFFFRGIQYFLQRRPSMKTFLVDSYSEMLFFLQSLFMLA  
TVVLYFSLHKEYVASMVFLALGWTNMLYYTRGFQQMGIYAVMIEKMILRDLCRFMF  
VYVFLFGFSTVMSLVRDGEQGCSMLMVAKWTSSEGRPTGCEGQSRYGTRADMLFK  
FTIGMGDLEFTENYDFKAVFIILLAYVILTYILLNMLIALMGETVNKIAQESKNIWKL  
QRAITILDTEKSFLKCMRKAFRSGKLLQVGYPDGKDDYRWCFRVDEVNWTWNTN  
VGIINEDPGNCEGVKRTLSFSLRSSRV SARHWKNFALVPLLRASARDRPSAQPEEVH

LRQFSGSLRPEDA EVFKSPASGEK-----  
-----

>TRPV1\_Ornithorhynchus\_anatinus

MKKLGSSDLAELEVTKEPLDDNPGSKPPPKHHIFSTARSRHRLFTKGDSEESAPMDS  
SYEEMEPASCPIIKFSPMVDRRRFMPGRPSPTLIFLRQLSVDSISIGSEKAFKLYDRRRIF  
DAVAQGNCRELEDLLVYLLKSTKQLTDVEFKDPETGKTCLLKAMLNLSQSGKNETIPLL  
LEIAGQTDNLKEFVNAGYTDSYYRGQTALHIAIERRNMYLVTLVQNGADVHAAAAG  
DFFKKTGRPGFYFGELPLSLAACTNQLGIVKFLQNPYHSADIDARDSIGNTVLHALV  
EVADNTPENTKFVTNMYNEILILGAKIHPTLNLEELTNKKGLTPLALAAKSGKIGYLSS  
RGNVLSYQVLAYILRREIQEPECRHLSRKFTWAYGPVHSSLYDLSCIDTCEKNSVLEVI  
AYSSETPNRHDMLLVEPLNRLQDKWDRFVKRIFYFNFFIYIYIITFTLVACYRPVDL  
NQKPPYALGNTALQYLQVFGFELTLLGGIYFFIRGIQYFLQRQPSLKTFLVDSYSEVLF  
QSLLLISVGLYFSGQKMYVAFMVLSLAMGWTNMLYYTRGFQQMGIYAVMIEKMILR  
DLCRFMFVYSVFLGFSTAVVSLIEDGKNSTECTCLWQGKRGNTCKPSSPSYNSLYSTC  
LELFKFTIGMGDLEFTDNYDFKVFVFIILLSYVILTYILLNMLIALMGETVNKVSQESK  
NIWKLQRAITILDIEKSFLNMRKAFRSGKLVQVGYPDGKDDYRWCFRVDEVNWTW  
WNTNLGIINEDPGNSEGIKRTLSFSLRSGRVSGKNWKTFLVPLLRDSTREPRPTPRP  
EEVRLRPFSGSLKPEDA EVQKESLILEE-----  
-----

>TRPV1\_Oryctolagus\_cuniculus

MKRWVSLDSGESEDPLPEDTCPDLLDGDSSNAKPPPAKPHIFSTAKSRSLFGKGDSEE  
TSPMDCSYEEGELAPCPAITVSSVIVQRSGDGPTCARQLSQDSVAAAGAEKPLKLYDR  
RRIFEAVAQNNCQELESLLCFLQRSKKRLTDSEFKDPETGKTCLLKAMLNLSHSGQNDT  
IPLLEIARQTDLSKEFVNASYTDSYKQGTALHIAIERRNMALVTLLVENGADVQAAA  
NGDFFKKTGRPGFYFGELPLSLAACTNQLAIVKFLQNSWQPADISARDSVGNTVLH  
ALVEVADNTPDNTKFVTSMYNEILILGAKLHPTLKLEELINKKGLTPLALAAAGSGKIGV  
LAYILQREILEPECRHLSRKFTWAYGPVHSSLYDLSCIDTCERNVLEVIAYSSSETPN  
RHDMLLVEPLNRLQDKWDRVVKRIFYFNFFVYCLYMIIFTTAAAYRVPDGLPPYKLR  
NLPGDYFRVTGEILSVAGGVYFFRGIQYFLQRRPSMKALFVDSYSEMLFFVQALFMLA  
TVVLYFSHCKEYVATMVFLALGWINMLYYTRGFQQMGIYAVMIEKMILRDLCRFMF  
VYLVFLFGFSTAVVTIIEDGKNSSTSAESTSHRWRGFGCRSSDSSYNSLYSTCLELFKFT  
IGMGDLEFTENYDFKAVFIILLAYVILTYILLNMLIALMGETVNKIAQESKSIWKLQR  
AITILDEKGFLLKMRKAFRSGKLLQVGYPDGKDDCRWCFRVDEVNWTWNTNVG  
IINEDPGNCEGVKRTLSFSLRSGRVSGRNWKNFALVPLLRDASTRDRHPXPEDVHLR  
PFVGSCLKPGDAELFKDSVAAA EK-----  
-----

>TRPV1\_Otolemur\_garnettii

MKKQRSSDLGEPEHLPQQDSCPEPPDGDPSKPPPAKSYFSTAKSRARLFGKGDSEEV  
SSMDGSYEEGEMASCPTITVSPVIVQRPGDGPTCARQLSQDSVTTGTEKTLKLYDRRR  
IFEAVAQNNCQELESLLLFLRKS KHLTDCEFKDPETGKTCLLKAMLNLSHSGQNDTIP  
LLEIARQTDLSKEFVNASYTDSYKQGTALHIAIERRNMALVTLLVENGADVQAAAAN  
GDFKKTKERPGFYFGELPLSLAACTNQLAIVKFLQNSWQPADISARDSVGNTVLHA  
LVEVADNTADNTKFVTTMYNEILILGAKLHPTLKLEELTNKKGMTPLALAAAGTGKIGV

LAYILQREIQEPECRHLSRKFTWAYGVPVHSSLYDLSCIDTCEKNSVLEVIAYSSSETPN  
RHDMLLVEPLNRLQLQDKWDRFVKRIFYFNFFAYCLYMVIFTTAAAYRVPDGLPPFKM  
KNTIGDYFRVTGEILSVAGGVYFFFRGIQYFLQRRPSMKALFVDSYSEMLFFIQSLFMLA  
TVVLYFSHRKEYVASMVFLAMGWTNMLYYTRGFQQMGIYAVMIEKMILRDLRCRFM  
FVYIVFLFGFSTAVVTLIEEGKNNSTSTNSTTHKWRGPGCRQVDSSYNSLYSTCLELFK  
FTIGMGDLEFTENYDFKAVFIILLLAYVILTYILLNMLIALMGETVNKIAQESKNIWKL  
QRAITILDTEKSFLKCMRKAFRSGKLLQVGYPDGKDDYRWCFRVDEVNWTWNTN  
VGIINEDPGNCEGVKRTLSFSLRPGRASGRNWKNFALVPLLRDASTRDRNPAHPEEVH  
LRQFSGSLKPDAEVFKNPTASGEK-----  
-----

>TRPV1\_Myotis\_lucifugus

MKKWGSDDSGEPEDLPQEDSHPKPLEGDPNSRPAPAKPSIFPTAKRSRFLFGKCDSEE  
ASPMDCSYEEGQPASCPAIVSPVVVVQKTGDGPTCARQSSQDSVPAGTERKLKLYDR  
RKIFEAVAQNNCEELESLLLFLQKSKHLMDFKDPETGKTCLLKAMLNLDHGHNS  
TIPLLEIARQTDSTELVNASYTDSSYKQGTALHIAIERRNMALVTLLVENGADVQAA  
ANGDFFKKTGRPGFYFGELPLSLAACTNQLGIVKFLQNSWQPADISARDSVGNVTL  
HALVEVADNTADNTKFVTSMYNEILILGAKLHPTLKLEELTNKKGLTPLALAASSGKIG  
VLAYILQREIQEPECRHLSRKFTWAYGVPVHSSLYDLSCIDTCEKNSVLEVIAYSSSETP  
NRHDMLLVEPLNRLQLQDKWDRFVKRIFYFNFFVYCLYMIIFTTAAAYRVPDGLPPFKL  
RYTVGDYFRVTGEILSVGGVYFFFRGIQYFLQRRPSLKSFLVDSYSEILFFVQSLFMLGT  
VVLYFCRRKEYVASMVFLAMGWTNMLYYTRGFQQMGIYAVMIEKQVLLACRIATFW  
LSFFFFFKAVVTLIEDGKNDSVAETTSRWRGPGCRPPDSSYNSLYSTCLELFKFTIG  
MGDLEFTENYDFKAVFIILLLAYVILTYILLNMLIALMGETVNKIAQESKNIWKLQRAI  
TILDTEKSFLKCMRKAFRSGKLLQVGYPDGKDDYRWCFRVDEVNWTWNTNVGII  
NERPNCEASKRTLSFSPALGQKIVSGRHWKNFALVPLLRDASTRERQPAQHEEVHLR  
HFAGSLKPDAEVFKDPAVFGEK-----  
-----

>TRPV1\_Normascus\_leucogenys

MKKWSSTDSGAAADPLQQDTCPDPLDGDPSRPPPAKPQLSMAKSRTLFGKGDSEE  
AFPVDCPHEEGELDSCPTITVSPVIIIQRPGDGPTGARLLSQDSVAASTEKTLRLYDRRSI  
FEAVAQNNCQDLESLLLFLQKSKHLLTDNEFKDPETGKTCLLKAMLNLDHGDQNDTIP  
LLLDIARQTDSLKEFVNASYTDSSYKQGTALHIAIERRNMALVTLLVENGADVQAAAH  
GDFFKKTGRPGFYFGELPLSLAACTNQLGIVKFLQNSWQPADISARDSVGNVTLHA  
LVEVADNTADNTKFVTSMYNEILILGAKLHPTLKLEELTNKKGMTPLALAAGTGKIGV  
LAYILQREIQEPECRHLSRKFTWAYGVPVHSSLYDLSCIDTCEKNSVLEVIAYSSSDTPN  
RHDMLLVEPLNRLQLQDKWDRFVKRIFYFNFLIYCLYMIIFTMAAYRVPDGLPPFKME  
KTEDYFRVTGEILSVLGGVYFFFRGIQYFLQRRPSMKTFLVDSYSEMLFFLQSLFMLAT  
VVLYFSLKQYVASMVFLALGWTNMLYYTRGFQQMGIYAVMIEKMILRDLRCRFMFV  
YVFLFGFSTAVVTLIEDGKNDSLPESTSHRWRGPGCRPPDSSYNSLYSTCLELFKFTI  
GMGDLEFTENYDFKAVFIILLLAYVILTYILLNMLIALMGETVNKIAQESKNIWKLQR  
AITIVPRKKSFKCMRKAFRSGKLLQVGYPDGKDDYRWCFRVDEVNWTWNTNVG  
IINEDPGNCEGVKRTLSFSLRSSRVSGRHWKNFALVPLLRASARDRHSAPQEEVHLR  
QFSGSLKPDAEVFKSPAASGEE-----  
-----

>TRPV1\_Mus\_musculus

MEKWASLDSDESEPPAQENSCPDPPDRDPNSKPPPAKPHIFATRSRTRLFGKGDSEEA  
SPMDCPYEEGGLASCPIITVSSVVTLQRSVDGPTCLRQTSQDSVSTGVETPPRLYDRRSI  
FDAVAQSNQCQELESLLSFLQKSKKRLTDFEFKDPETGKTCLLKAMLNHLHNGQNDTIAL  
LLDIARKTDSLKQFVNASYTDSYYKGQTALHIAIERRNMALVTLLVENGADVQAAANG  
DFFKKTGRPGFYFGELPLSLAACTNQLAIVKFLQNSWQPADISARDSVGNLTVLHAL  
VEVADNTADNTKFTVNTMYNEILILGAKLHPTLKLEELTNKKGLTPLALAASSGKIGVL  
AYILQREIHEPECRHLSRKFTWAYGPVHSSLYDLSCIDTCEKNSVLEVIAYSSSETPNR  
HDMLLVEPLNRLQDKWDRFVKRIFYFNFFVYCLYMIIFTTAAAYRPEVGLPPYKLN  
TVGDYFRVTGEILSVSGGVYFFFRGIQYFLQRRPSLKSFLVDSYSEILFFVQSLFMLVSVV  
LYFSHRKEYVASMVFLAMGWTNMLYYTRGFQMGYAVMIEKMILRDLRCRFMFVYL  
VFLFGFSTAVVTLIEDGKNNSLPVEPPHKCRGSACRPGNSYNSLYSTCLELFKFTIGMG  
DLEFTENYDFKAVFIILLAYVILTYILLNMLIALMGETVNKIAQESKNIWKLQRAITIL  
DTEKSFLKCMRKAFRSGKLLQVGFTPDGKDDFRWCFRVDEVNWTWNTNVGIINED  
PGNCEGVKRTLSFSLRSGRVSGRNWKNFALVPLLRDASTRDRHSTQPEEVQLKHYTG  
SLKPEDA EVFKDSMAPGEK-----  
-----

>TRPV1\_Oligodon\_lacroixi\_fragment

SFYHMEQLDTNPIIKFSFRLERGRCGNHCPKLLSTASIGVCAGKAFKIYDRRSLFDAVA  
QGDPSQLDDLLIYLLESKILNTDAEFKEPDTGKTCLLKAMLNHLHNGRNDTIPLLEIAE  
KTENLEEFVNAGYTDGYKQGTALHIAIERRNMYLVNLLVKNGADVHARAHGEFFQK  
IKGKPGFYFGELPLSLAACTNRLNIVKFLLENPYQPANIAAQSMSGSTVLHALVEIADD  
TDDNTKFTVTKMYNDVLILGASINPTLRLEELTNRRGLTPLTLAAKTGKIQVFAYILRRE  
MKEPECRHLSRKFTWAYGPVHSSLYDLSSIDTCEKNSVLEIIAYSSETPNRHEMLLVE  
PLNQLLQDKWDRFVKHLFYFNFFIYTAHILITVAAYRPTKKEGMPPTFFHSSGEY  
FRVTGEILRVLGGAYFFFRGIKYFQRRPSLKAIFTECYSELLFFAHSVLLLGSVLYFSK  
QEVYVVMVLFALALGWSNLIYYTRGFQMGYISVMLEKMMLRDLGRFIMVYMLFHLG  
FSTAVVTLIEEDNEGRPEIPPQQDSCPLVRARPSYNNLYTTCLELFKFTIGMGDLEFT  
ENYRFKSVFIILLLVYVVLTYILLNMLIALMGETVNKIAQESKSIWKLQRTITILNIEKSY  
WNCIINSFRSGKRVLVGTTTPDGKEDYRWCFRVDEVNWTWNTNLS-----  
-----  
-----

>TRPV1\_Ovophis\_monticola\_fragment

SFYHMEQLASNPIIKFSLSLERGRGDHCPKLLSTASIGVCAGKAFKIYDRRCLFDAVAQ  
GDTSQLDDLLIFLLESKILTDAEFKEPDTGKTCLLKAMLNHLHNGRNDTIPLLEIAEK  
TENLKEFVNTGYTDSYRGQTALHIAIERRNMYLVNLLVKNGADVHARAHGEFFQKI  
KGKPGFYFGELPLSLAACTNQLNIVKYLLENPYQQANIAEQDSMGNTVLHALVEIADN  
TADNTKFTVTRMYNDMLILGARINPTLRLEEVANRRGLTPLTLAAKMGKIQVFAYILRR  
EMKEPECRHLSRKFTWAYGPVHSSLYDLSSIDTCEKNSVLEIIAYSSETPNRHEMLLV  
EPLNQLLQDKWDRFVKHLFYFNFFTYTVHILITVAAYRPTKKEGTPPTFRHTRGE  
YFRVTGEILSVLGGAYFFFRGIKYFQRRPPLKAIFTECYSELLFFVHSLLLLGSVLYFS  
RQEVYVVMVLFALALGWSNLIYYTRGFQMGYISVMLEKMMLRDLGRFIMVYLLFHL  
GFSTAVVTLIEEDNEGRPETAQPLDVCPCPVRRARPSYNNLYTTCLELFKFTIGMGDLEF



TENYHFKSIFIILLLIYVVLTYIILLNMLIALMGETVNKIAQESKSIWKLQRTITILNIENS  
YWNCIINSFRSGKRVLVGTTPDGKDDYRWCFRVDEVNWSTWNTNLS-----  
-----  
-----

>TRPV1\_Plagiopholis\_blakewayi\_fragment

SFYHMEQLDSNPIIKFSFRLERGRCGNHCPKLLSTASIGVCAGKAFKIYDRRSLFDAVAQ  
GDPSQLDDLLIYLLESKLTLD AEFKEPDTGKTCLLKAMLNHLHNGRNDTIPLLEIAEK  
TESLQEFVNAGYTDGYKQGTALHIAIEGRNMYLVNLLVKNGADVHARAHGEFFQKIE  
GKPGFYFGELPLSLAACTNQLNIVKFLENPYQPANIAEQDSMGNTILHALVEIADDDTD  
DNTKRVTKMYNDVLLGASTNPTLRLEELTNRRGLTPLTLAAKTGKIQVFAYILRREM  
KEPECRHLSRKFTWAYGVPVHSSLYDLSSIDTCEKNSVLEIIAYSSETPNRHEMLLVEP  
LNQLLQDKWDRFVKHLFYFNFFIYTVHILITVAAYYRPTKKEGTPPFTFHRRDEYF  
RVTGEILSVGGAYFFFRGIKYFQQRPSLKAIFTECYSELLFFVHVVLLGSAVLYFSKQ  
EVYVVLVMFALALGWSNLIYYTRGFQQMGIYSVMLEKMMLRDLGRFIMVYLLFHLGF  
STAVVTLIEEDNEGRPEIPQPQACPCPVKARPSYNNLYTTCLELFKFTIGMGDLEFTE  
YRFKSVFIILLLIYVVLTYIILLNMLIALMGETVNKIAQESKSIWKLQRTITILNIENSY  
WNCIINSFRSGKRVLVGTTPDGKEDYRWCFRVDEVNWSTWNTNLS-----  
-----  
-----

>TRPV1\_Protobothrops\_jerdonii\_fragment

SFYHMEQLASNPIIKFSLSLERGRCGDHCPKLLSTASIGVCAGKAFKLYDRRSLFDAVA  
QGDPQLDDLLIFLLESKILTDAEFKEPDTGKTCLLKAMLNHLHNGRNDTIPLVLEIAE  
KTENLKEFVNTGYTDSYRQGTALHIAIERNMYLVNLLVKNGADVHARAHGEFFQK  
IKGKPGFYFGELPLSLAACTNQLNIVKYLENPYQPANIAEQDSMGNTVLHALVEIADN  
TADNTKRVTRMYNDMLILGARINPTLRLEEVANRRGLTPLTLAAKMGKIQVFAYILRR  
EMKESECRHLSRKFTWAYGVPVHSSLYDLSSIDTCEKNSVLEIIAYSSETPDRHEMLLV  
EPLNQLLQDKWDRFVKHLFYFNFFTYTVHILITVAAYYRPTKKEGTPPFTFRHTRGE  
YFRVTGEILSVLGGAYFFFRGIKYFQQRPSLKAIFTECYSELLFFVHSLLLGSAVLYFS  
RQEVYVVLVMFALALGWSNLLYYTRGFQQMGIYSVMLEKMMLRDLGRFIMVYLLFHL  
GFSTAVVTLIEEDNEGRPETAQPAGVCPCPVRRARPSYNNLYTTCLELFKFTIGMGDLEF  
TENYHFKSIFIILLLIYVVLTYIILLNMLIALMGETVNKIAQESKSIWKLQRTITILNIENS  
YWNCIVNSFRSGKRVLVGTTPDGKDDYRWCFRVDEVNWSTWNTNLS-----  
-----  
-----

>TRPV1\_Pseudoxenodon\_macrops\_fragment

SFYHMEQLDSNPIIKFSFRLERGRCGNHCPKLLSTASIGVCAGKAFKIYDRRSLFDAVAQ  
GDPSQLDDLLIYLLESKLTLD AEFKEPDTGKTCLLKAMLNHLHNGRNDTIPLLEIAEK  
TESLQEFVNAGYTDGYKQGTALHIAIERNMYLVNLLVKNGADVHARAHGEFFQKIE  
GKPGFYFGELPLSLAACTNQLNIVKFLENPYQPANIAEQDSMGNTILHALVEIADDDTD  
DNTKRVTKMYNDVLLGASINPTLRLEELTNRRGLTPLTLAAKTGKIQVFAYILRREM  
K

EPECRHLSRKFTWAYGVPVHSSLYDLSSIDTCEKNSVLEIIAYSSETPNRHMLLVEPL  
NQLLQDKWDRFVKHLFYFNFFIYTVHTLILTVAAYYRPTKKEGTPPFTFHRRGEYFR  
VTGEILSVLGGAYFFFRGIKYFQRRPSLKAIFTECYSELLFFVHSVLLLGSVLYFSKQE  
VYVLMVFALALGWSNLIYYTRGFQQMGIYSVMLEKMMLRDLGRFIMVYLLFHLGFS  
TAVVTLIEEDNEGRPETPPPQVCPCPVKARPSYNNLYTTCLELFKFTIGMGDLEFTENY  
RFKSVFIILLIYVVLTYILLNMLIALMGETVNKIAQESKSIWKLQRTITILNIENSYWN  
CIINSFRSGKRVLVGTTPDGKEDYRWCFRVDEVNWSWTWNTNLS-----  
-----  
-----

>TRPV1\_Xenopus\_laevis

MKKMGSSDIDETEETCASIETDESHSDDTNRSAQENRKKLKFCQAKYSIFSSPKPKGR  
RFGKTETDRDMAPMDSVYQIESKVISPAIKFHRNLERGKLCNQLVRQSTSLESTSSCKD  
RTFKLYDQRRIFDAAAYGDCCEEDLLVYLLRTHKRLTNEEFKEKETGKTCLLKAMLN  
LDKGMNHTILLFLEIAEKTDNLKEFINSAYRDNYRGTALHIAIERRNMDLVQLLQ  
HGADVHARADGEFFRKAKGKAGFYFGELPLSLAACTNQTAVRYLLQNQHSPANIAAR  
DSFGNTVLHALVDIADNTQENTAFVTKMYNEILVLGAQIKPSLKIEEIANKKGLTPLSL  
AAKTGKIGVFAYILRREIKNLECRHLSRKFTWAYGVPVHSSLYDLGVDTYEKNSVLEII  
AYSSETPNRHDMMLLVEPLNKLQDKWDHFVKRIFYFNFFAYIIVIIFTIAAYYRPVDGS  
PPFPVQYGSYLRTSGELITVIGGIYFFFRAIQYFTQRRPSLKALLADSYCEFLFFSQSVELL  
LSTVLYFCGRNEYVAFLVICLAMSWANVLYYTRGFQLMGIYSVMIEKLILSDMVRFLFV  
YLLFLFGFAAALVTLIEDGEGRDVTNNTCGRRCKPEPASYNLYTTCQELFKFAIGMG  
DLEFTDNYKYKPVFIFLLITYVILTYILLNMLIALMGETVSKVAQESKSIWKLQRAITIL  
DIEKSFLNSFRDTRSGKSVLVGITPDGKEDYRWCFRVDEVNWNKWNNSNLGIIKEDPG  
NCHGFKSTLSASFRPRGRRWRSVPHIKEINLGNENETVPEEVPLQIQPALSQTVKKE  
DQEVTSKAE-----  
-----

>TRPV1\_Xenopus\_tropicalis

MKKMGSSDIDETEETCASVETDESHSDDTNRSTQENRKKLKFCQAKYSIFSSPKPKG  
RRFGKAETDRNIAPMDSVYQIESKVMSPTIKQFNLEKGGKLCNQLVRQSSSLESTTSCK  
DRTFKLYDQRRIFDAAAYGDCDELDDLLVYLLRTHKRLTNEEFKEKETGKTCLLKAM  
LNLENGMNSTIPLFLEIAEKTDNIKEFINSAYRDNYRGTALHIAIERRNMDLVELL  
QHADVHARADGEFFRKAKGKAGFYFGELPLSLAACTNQTAMVQYLLQNQYSPANM  
AAKDTFGNTVLHALVDIADNTQENTTFVTKMYNEILVLGAQIRPSLKLEEIMNKKGLT  
PLSLAAKTGKIGVFAYILRREIKNFECRHLRSRKFTWAYGVPVHSSLYDLGVDTYEKNS  
VLEIIAYSSETPNRHMLLVEPLNKLQDKWDRFVKRIFYFNFLAYITYVIIFTVAAYYR  
PVDGSPFPVQPNLYRTCGELITVIGGIYFFFRIQYFTQRRPSLKALIADSYEFLFFA  
QSIFLLLSTMLYFCGRNEYVAFLVICLAMSWANVLYYTRGFQLMGIYSVMIEKLILSDM  
VRFMFVYLLFLFGFAAALVTLIEDGEGRDNLSTCGRRCKPEPASYNLYTTCQELFK  
FAIGMGDLEFTDNYKYKPVFIFLLITYVILTYILLNMLIALMGETVSKVAQESKSIWKL  
QRAITILDIEKSFLNSFRDTRSGKSVLVGFTPDGKEDYRWCFRVDEVNWNKWNNSNL  
GIIKEDPGNCHGLKSTLSASFRPRGKRWKSVPVHVKETNVKIDNETVPEEIPLQKPTL  
ADQTVPEEDQEVTSKAE-----  
-----

>TRPV1\_Zebra\_finch

RLLSTDSITGCSEKAFRFYDRRRIFDAVAQGNTKDLSDLLLYLNRTFKHLTDEEFKFTE  
PETGKTCLLKAMLNLHDGKNDTIPLLLDIARKTGTLKEFVNAEYTDNYKQGTALHIA  
IERRNMYLVKLLVQNGADVHARACGEFFRKIKGKSGFYFGELPLSLAACTNQLCIVKFL  
LENPYQAANITAEDSMGNMVLHTLVEIADNTKDNTKFVTKMYNNILILGAKINPILKL  
EELTNKKGLTPLTLAAKTGKIGIFAYILRREIKDPECRHLSRKFTWAYGPVHSSLYDLS  
CIDTCEKNSVLEILAYSSETPNRHEMLLVEPLNRLQDKWDRFVKHLFYFNFFVYTMH  
ITILTAAYYRPVQKNEKPPFTFGYSPGEYFRVAGEILSVLGGLYFFFRGVRYVHYSQHQ  
WGIFRVTGEILSVLGGLYFFFRGIQYFVQRRPSLRTLIVDGYSEVLFVHSSLLSSVLY  
FCGQELYVASMVFLALGWTNMLYYTRGFQQMGIYSVMIKMLRDLCRFMFVYLVF  
LLGFSTAVVTLIEDDNEGQDTNISDYARCCQVKRGRSYNSLYTTCLELFKFTIGMGDL  
EFTENYRFKSVFVILLVLYVILTYILLNMLIALMGETVNKIAQESKSIWKLQRAITILDI  
ENSYLNCLRHSFRSGKQVLVGITPDGQDDYRWCFRVDEVNWSTWNTNLGIINEDPGY  
SGDLRRNLSFSIKPGRVSGKNWKTLPVLLKDGKRRREPHKPPPEVKLKP-----  
-----  
-----

>TRPV1\_Bungarus\_multicinctus\_fragment

SFYHIEQLDSNPIIKFSFRLEKGHCGNHCPKLLSTASIGVCAGKAFKIYDRRSLFDAVAQ  
GDPSQLDDLLIYLLESKLNLTDAEFKEPDTGKTCLLKAMLNLHNGRNDTIPLLEIAAK  
TENLQEFVNAGYTDSSYKQGTALHIAIERRNMYLVNLLVKNGADVHARAHGEFFQKI  
KGKPGFYFGELPLSLAACTNQLNIVKFLLENPYQPANIAAQDSMGNTVLHALVGIADD  
TDDNTKFVTKMYNDVLILGARINPTLRLEEIANRRGLTPLTLAAKTGKIQVFAYILRRE  
MKEPECRHLSRKFTWAYGPVHSSLYDLSSIDTCEKNSVLEIIAYSSETPNRHEMLLVE  
PLNQLLQDKWDRFVKHLFYFNFFIYTAHILITVAAYYRPTKREGTPPFIFHHTRGEYF  
RVTGEILSVLGGAYFFFRGIKYFQRRPSLKATFTECYSELLFFFHVSLLLGAAVLYVSR  
QEVYVVMVAFALGWSNLIYYTRGFQQMGIYSVMLEKMMLRDLGRFIMVYLLFHLG  
FSTAVVTLIEEDNEGRAETTQQQLEACPCPVKPRPSYNNLYTTCLELFKFTIGMGDLEF  
TENYRFKSVFIILLVYVVLTYILLNMLIALMGETVNKIAQESKSIWKLQRTITILNIEN  
SYWNCIVNSFRSGRRVLVGITPDGKEDYRWCFRVDEVNWSTWNTNLS-----  
-----  
-----

>TRPV1\_Amphiesma\_sp\_fragment

SFYHMEQLDSNPIIKFSFRLERGRCGNHCPKLLSTASNGVCAAKAFKIYDRRSLFDAVA  
QGDPQLDDLLIYLLESKLNLTDAEFKEPDTGKTCLLKAMLNLHNGRNDTIPLLEIAE  
KTENLKEFVNAGYTDGYYKQGTALHIAIERRNMYLVNLLVKNGADVHARAHGEFFQK  
IKGKPGFYFGELPLSLAACTNQLNIVKFLLENPYQPANIAEQDSIGNTVLHALVEIADD  
DENTKFVTKMYNDVLILGASINPTLRLEELANRRGLTPLTLAAKTGKIQVFAYILRREM  
KEPECRHLSRKFTWAYGPVHSSLYDLSSIDTCEKNSVLEIIAYSSETPNRHEMLLVEP  
LNQLLQDKWDRFVKHLFYFNFFIYTAHILITVAAYYRPTKKEGTPPFAFHHTSSEYFR  
VTGEILSVLGGAYFFFRGIKYFQQRHPSLKAIFTECYSELLFFVHVSLLLGSVLYFSKQE  
VYVVMVAFALGWSNLIYYTRGFQQMGIYSVMLEKMMLRDLGRFIMVYLLFHLGFS  
TAVVTLIEEDGRPETPPPEGCPCPVKARPSYNNLYTTCLELFKFTIGMGDLEFTENY  
RFKSVFIILLVYVVLTYILLNMLIALMGETVNKIAQESKSIWKLQRTITILNIENSYWN

CIINSFRSGKCVLVGTTPDGKEDYRWCFRVDEVNWSTWNTNLS-----  
-----  
-----  
-----

>TRPV1\_Carollia\_brevicauda

MKKRGSSDSGESEDLPQEDPLPDPLDGDPHSRPAPAKPNIPTAKSRSLFGKGDSEEA  
SSLDCSYKEGQPASCPAIVSPVLMVQKTEDGPTCTWQLCQDSVPAGTKKSLKLYDRR  
KIFEAVAQNNCEELESLLLFLQRSKKHLMDFKDPETGKTCLLKAMLNLHNGQNNTI  
PLLEIARQTDSLKELVNASYIDSYYKQTALHIAIERRNMALVTLLENGADVQAAAN  
GDFFKTKGRPGFYFGELPLSLAACTNQLGIVKFLQNSWQPADISARDSVGNTVLHA  
LVEVADNTADNTKFVTSMYNEILILGAKLHPTLKLEELINKKGLTPLALAASSGKIGVL  
AYILQREIHEPECRHLSRKFTWAYGPHSSLYDLSCIDTCEKNSVLEVIAYSSNETPNR  
HDMLLVEPLNRLQDKWDRFVKRIFYFNFFVYCLYMIIFTTVAYYRPEGLPPYKVKH  
TVGDYFRVTGEILSVLGGVYFFFRGIQYFLQRQPSLKSFLVDSYSETLFFVQSLFMLGTV  
VLYFCQCKEYVASMVFLAMGWTNMLYYTRGFQQMGIYAVMIEKMILRDLCRFMFVY  
LIFLFGFSTAVVTLIEDGKNDSVSTETTPHRWRGPCYRSPDSSYNSLYSTCLELFKFTIG  
MGDLEFTENYDFKAVFIILLAYVILTYILLNMLIALMGETVNKIAQESKNIWKLQRAI  
TILDTEKSFLKCMRKAFRSGKLLQVGYTPDGKDDYRWCFRVDEVNWTTWNTNVGII  
NEDPGNCEGIKRTLSFSLRSSRVAGRWNKNFALVPLLRDASTRERQPAQPPEEVHLKHF  
SGSLKPEDA EVFKDPAALG-----  
-----

>TRPV1\_Crotalus\_atrox

MRKLGSSDLEESESTDDHTDGEDAAAGTPKGTKHGIFARRARFGIGDGDKDMAPMDS  
FYHMEQLASNPIIKFSLSLERGRGNHCPKLLSTASIGVCAGKAFKIYDRRTLFDVAQ  
GDTSQLDDLLIFLLESVKNLTD AEFKEPDTGKTCLLKAMLNLHNGRNDTIPLLEIAEK  
TENLKEFVNTGYTDSYRGQTALHIAIERRNMYLVNLLVKNGADVHARAHGEFFQKI  
KGKPGFYFGELPLSLAACTNQLNIVKYLLNENPYQANIAEQDSMGNTVLHALVEIADN  
TVDNTKFVTRMYNDMLILGARINPALRLEEVTNRRGLTPLTLAAKMGKIQVFAYILRR  
EMKEPECRHLSRKFTWAYGPHSSLYDLSSIDTCEKNSVLEIIAYSSETPNRHEMLLV  
EPLNQLLQDKWDRFVKHLFYFNFFTYTVHILITVAAYYRPTKKEGTPPFTFRHSRGE  
YCRVTGEILTVLGGAYFFFRGIKYFQRRPSLKAIFTECYSELLFFVHSLLLLSAVLYFS  
GQEVYVLMVLFALALGWSNLLYYTRGFQQMGIYSVMLEKMMLRDLGRFIMVYLLFHL  
GFSTAVVTLIEEDNEGRPETAQPLDVCPCPVRARPSYNNLYTTCLELFKFTIGMGDLEF  
TENYHFKSIFIILLIYVVLTYILLNMLIALMGETVNKIAQESKSIWKLQRTITILNIENS  
YWNCCIINSFRSGKRVLVGTTPDGKDDYRWCFRVDEVNWSTWNTNLSIINEDPGGHTE  
ELKRNLFSFKSRVSGKNWKTLPILRDGKREGSLKPISEDYADSDEQDVRKKS LPN  
PVL-----  
-----

>TRPV1\_Daboia\_siamensis\_fragment

SFYHMEQLASNPIIKFSLSLERGRGNHCPKLLSTASIGVCAGKAFKIYDRRSLFDVAQ  
GDPSQLDDLLIFLLES LKNLTD AEFKEPDTGKTCLLKAMLNLHNGRNDTIPLLEIAEK  
TENLTFVNAGY TDSYRGQTALHIAIERRNMYLVNLLVKNGADVHARAHGEFFQKI  
KGKPGFYFGELPLSLAACTNQLNIVKYLLNENPYQAANIAEQDSMGNTVLHALVEIADN

TADNTK FVTRMYNDMLILGARINPTLRLEE VANRRGLTPLTLAAKMGKIQVFAYILRR  
EMKEPECRHLSRKFTWAYGPVHSSLYDLSSIDTCEKNSVLEIIAYSSETPNRHEMLLV  
EPLNQLLQDKWDRFVKHLFYFNFFTYAVHILITVAAYRPTKKEGTPPFTFRHTRGE  
YFRVTGEILSVLGGAYFFFRGIKYFQRRPSLKAIFTECYSELLFFVHVSLLLGSVLYFS  
RQEVYVLMVFALALGWSNLLYYTRGFQQMGIYSVMLEKMMLRDLGRFIMVYLLFHL  
GFSTAVVTLIEEDNEGRPEMAQPLDVCPCPVKARPSYNNLYTTCLELFKFTIGMGDLE  
FTENYHFKSIFILLIYVVLTYILLNMLIALMGETVNKIAQESKSIWRLQRTITILNIEN  
SYWNCIINSFRSGKRVLVGTTPDGKDDYRWC FRVDEVNWSTWNTNLS-----

>TRPV1\_Danio\_rerio

MDSSVSSFSLETDDQTEEERTKAKQMKKVSKDKRPMDSNYVDDVVEPSSTIKFNLHF  
DRGIRNLKEEPAQQDNDRFTIKRLF EAVSSGDVSKMQLHEYLHKNMKRLTDSQYKS  
NGKTALLKALLNLRQGENDTIEQLLDIAEKMGDLKNFINAAYTDSYKQGTALHVAIE  
RRSMKFVQMLVKKGADVHAKACGKFFQPNQKMC FYFGELPLSLAACTNQQDIVDFL  
MENPHQAVDVRERDCHGNTVLHALVSVADNSPENTEFVIAMYDHILIKADQLHPKTK  
LEEIENNEGLTPITLAAKKGKLG LFKHIVQRELMGCRHLSRKITEWAYGPVCSLYDLS  
SLDTYEKNSALEIVVYGSEIPNRLEMLQIEPLNRLIEEKWDQFAHRMFLFNFIYVYILF  
IFTASAFYHEEGKDYANQPPYLYAKSREGYLLLTGHIISITGAFYFFIRGLIDMVRKRPRF  
QSLIIDGYTDQLFFVQGLLFLASVVLYCYGQYEYLAFLVLCLALSWINLLYFSRGSKNLGI  
YNVMIQKMVLGEIRRFVVMVFLIGFSAALVTLDDQESIDSGSTRDFRLSEDIPSLNPT  
PDSSNPQSRMTHHQPTTARDGRGRFGLTTDNQYEVCKKPSYKNIYFTTLELFKFTIGM  
GDLEFTDHYKYKEVFYVLLIVYIVMTYILMLNMLIALMNQSVEMMSVESTSIWKLQRA  
ITTLDMEWILPKCLQGKLRSGEEKDLGGGQEPDRRWCF SVEEVNWTQWNRNMGIIN  
EDPGKCTQDPSANVQREPSRGVLQTF SRRRRRTQRAQTREGHELSP LAEASSSV-----

>TRPV1\_Eryx\_tataricus\_fragment

SFYHMEHLGSSPIIKFSLSLERGRCGNHCPNLLSTASIGVRAGKAFKIYDRRSLF DAVAQ  
GDPSMLDDLLVYLLES LKNLTDEEFKEPDTGKTCLLKAMLNLHHGRNDTIPLLEIAE  
KTQNLKEFVNAGYTD SYKQGTALHIAIERRNLYLVNLLVKN GADVHARAHGEFFQKI  
KGKPGFYFGELPLSLAACTNQLNIVKYLLENPYQPAHIAEQDSMGNTILHALVEIADDT  
EDNTK FVTKMYNDVLILGARINPTLRLEE IANRRGLTPLTLAAKTGKIQVFAYILRREM  
KEPECRHLSRKFTWAYGPVHSSLYDLSSIDTCEKNSVLEIIAYSSETPNRHEMLLVEP  
LNQLLQDKWDRFVKHLFYLNFFIYTAHILITVAAYRPTKKGTPPFTFHHTSSEYLR  
STGELLSVTGGAYFFFRGIKYFQRRPSLKAIFTESYSELLFFVHVSLLLGSVVLVYFSRQE  
TYVLMVFALALGWANLLYYTRGFQQMGIYSVMLEKMMLRDLRCRFIMVYLLFHLGFS  
TAVVTLIEEDNEGRPEISQTPNVCPCPVKPRPSYNNLYTTCLELFKFTIGMGDLEFTEN  
YHFKSVFIILLIYVVLTYILLNMLIALMGETVNKIAQESKSIWKLQRAITILNIENSYW  
NCIVNSFRSGKRVLVGTTLDGKEDYRWC FRVDEVNWSTWNTNLS-----

>TRPV1\_Meleagris\_gallopavo

MSSILEKMKKFGSSDIEESEVTDEHTDGEDSALEAPDNLQGTFSKQVQPSRSNIFARRG  
RFVMGSDSDKDMAPMDSFYQMDHLMAPSVIKFHANMERGKHLKLLSTDSITGCSEKA  
FKFYDRRRIFDAVAQGN TKDLDDLLLYLNRTLKHLTDDEFKEPETGKTCLLKAMLNL  
HDGKNDTIPLLLDIAKKTGTLKEFVNAEYTDNYKQGTALHIAIERRNMYLVKLLVQN  
GADVHARACGEFFRKIKGKPGFYFGELPLSLAACTNQLCIVKFLENPYQAADIAAEDS  
MGNMVLHTLVEIADNTKDNTKFVTKMYNNILGAKINPILKLEERTNKKGLTPLTLA  
AKTGKIGIFAYILRREIKDPECRHLSRKFTWAYGPVHSSLYDLSCIDTCEKNSVLEIAY  
SSETPNRHEMLLVEPLNRLQDKWDRFVKHLFYFNFFVYAIHISILTTAAYRVPVQKG  
ENPPFTFGHSTGEYFRVTGEILSVLGGLYFFFRGIQYFVQRRPSLKTIVDSYSEVLFFVH  
SLLLLSSVVLYFCGQELYVASMVFLALGWANMLYYTRGFQQMGIYSVMIAMILRDL  
CRFMFVYLVFLGFASTAVVTLIEDDNEGQDTNSSECARCSHTKRGRSNTSYNSLYYTCLL  
FKFTIGMGDLEFTENYRFKSVFVILLVLYVILTYILLNMLIALMGETVSKIAQESKSIW  
KLQRAITILDIENSYLNCLRRSFRSGKQVLVGITPDGQDDYRWCFRVDEVNWSTWNT  
NLGIINEDPGCSGDLKRNPYSIKPGRVSGKNWKTLPVLLRDGSRREETQKLPEEIKLK  
PILEPYEPEDCETLKESLPKSV-----  
-----

>TRPV2\_Rattus\_norvegicus

MTSASSPPAFRLETSDGDEEGNAEVNKGKQEPPEMESPQREDRNSSPQIKVNLNFIK  
RPPKNTSAPSQQEPDRFDRDLFSVVSARGVPEELTGLLEYLRWNSKYLTDSAYTEGST  
GKTCLMKAVLNLQDGVNACIMPLLQIDKDSGNPKLLVNAQCTDEFYQGHSAHIAIEK  
RSLQCVKLLVENGADVHLRACGRFFQKHQGTFCFYFGELPLSLAACTKQWDVVTYLLE  
NPHQPASLEATDSLGN TVLHALVMIADNSPENSALVIHMYDGLLQMGARLCPTVQLE  
EISNHQGLTPLKLAKEGKIEIFRHILQREFSGPYQPLSRKFTEWCYGPVRSVLYDLSSV  
DSWEKNSVLEIIAFHCKSPNRHRMVVLEPLNKLQEKWDRLVSRFFNFACYLVYMFIF  
FTVVAYHQPSLDQPAIPSSKATFGESMLLLGHILILLGGIYLLGQLWYFWRRRLFVWIS  
FMDSYFEILFLLQALLTVLSQVLRFMETEWYLPVLLVSLVGLWLNLLYYTRGFQHTGIY  
SVMIQKVLRLDLLRFLVYLVFLFGFAVALVLSREARSPKAPEDNNSTVTEQPTVGQE  
EEPAPYRSILDASLELFKFTIGMGELAFQEQLRFRGVVLLLLLAYVLLTYVLLNMLIAL  
MSETVNHVADNSWSIWKLQKAISVLEMENGYWWCRRKKHREGRLKVGTRGDGTP  
DERWCFRVEEVNWAWEKTLPTLSEDPSPGITGNKKNPTSKPGKNSASEEDHLPLQ  
VLQSP-----  
-----

>TRPV2\_Ailuropoda\_melanoleuca

MASPSSPLAFRLQISDGGQEDGGEVDKGGRGDGPPEMESPQGEDRNSSPQIKVNLNY  
RKRAGVSQDPNRFDRDLFSVVARVPEDLAGLPEYLSRTSKYLTDSAYTEGSTGKT  
CLMKAVLNLRDGANACILPLLQIDRDSGNPQPLVNAQCTDEYYRGHSAHIAIEKRSQ  
CVKLLVENGANVHARACGHFFQKKSQGTFCFYFGELPLSLAACTKQWDVVTYLLENPH  
QPASLQAADSLGN TVLHALVMIADNSAENSALVIRMYDGLLRTGARLCPTVQLEDIPN  
LQGLTPLKLAKEGKIEIFRHILQREFSGPCQSLSRKFTEWCYGPVRSVLYDLASVDSW  
EENSVLEIIAFHCRSPHRHRMVVLEPLNKLQAKWDLIPKFFNFCLYTYMLLFTAV  
AYHQPALEKPPFPKVTAGDSMLLLGHILILLGGVYLLVGLWYFWRRRLFVWISFVDS  
YFELLFLAQALLMVLSQALCFLAVEWYLPVLLVSSLVGLWLNLLYYTRGLQHTGIYSVMI

QKVILRDLLRFLLVYLVFLFGFAVALVSLRSREARAPGVPTGPNVTEAVQPGAGQTDEEG  
SAPPYGSILDASLELFKFTIGMGELAFQDQLRFRGVVLLLLLAYVLLTYILLNMLIALM  
SETVNSVATDSWSIWKLQKAISVLEMENGYWWCRRKKQPAGVKLTIGTRPDGSPDER  
WCFRVEEVNWAWEQTLPTVCEEPSGPAVPGTLKNPAPASQLEEDTASEEDQLPLQL  
LKSQ-----  
-----

>TRPV2\_Bos\_taurus

MTTPSSSPAFRLETSDDGGDEDGAQGDGTNGGRSSEPPPMESRFQSEDRNSSPQIRVNL  
NFRRAAGASQPDNRFGRDRLFSAVARGAPEDLAGLPEYLRRTSKYLTDSYREGSTG  
KTCLMKALLNLRDGANACIEPLLQIDRDSGNPHPLVNAQCMDEYYRGHSALHIAIEKR  
SLVCVKLLVENGADVHARACGQFFQKRREETCFYFGELPLSLAACTQQWDVVITYLLK  
NTHQPASLQATDSLGNLTVLHALVMIADNSPENSMLVTHMYDRLLQVGGGLQLEDMTN  
LQGLTPLKLAAKEGKIEIFRHILQRELPEPYQSLSRKFTEWSYGPVRSVLYDLASVDSW  
EENSVEIIAFHSRSPRHRMVVLEPLNKLKAKSNLLIPRFLNFCYLYMLIFTAVT  
YYQPALEKDFLPLEVTAGNTMLLLGHVLLLLGGVNLLMGQLWYFWRRRLFVWISFMD  
SYFEILFLVQALLTVLSQVLRFLAVKGYLPLLVCSLVLGWLNLLYYMRGFQYTGIVSVM  
QKVILRDLLRFLGVYLVFLFGFAVALVSLRSREPQDTGAPAGSNTTEVAGKEDKEAPYRG  
ILDTSLELFKFTIGMGELAFQDQLHFRGVVLLLLLAYVLLTYVLLNMLIALMSETVNS  
VATDSWSIWKLQKAISVLEMEKGYWWCRRKQQRAGVKLTVGSRPDGSPDERWCFR  
VEEVNWAWEQTLPTVFEEPSGRGGGPAITSPALASQSSQDSAVEEDHVPLQPLESH-  
-----  
-----

>TRPV2\_Callithrix\_jaccus

MTSPSSPPAFRLETLDQEDGSETDKEKLEFGRGPPPMESQFQSEDRNVSPQIKVKL  
NYRKGTGGSQQDENRFRDRWLFNAVSRGVPEDLAGLPEYLRKTSKYLTDSYTEGST  
GKTCLMKAVLNLKDGVNACILPLLQIDQHSGNPQPLVSAQCKDDYYRGHSALHIAIEK  
RSLQCVKLLVENGADVHARACGRFFQKQGTCTFYFGELPLSLAACTKQWDVVSYLLE  
NPHQPASLQATDSQGNLTVLHALVMISDNSAENITLVTSMYDGLLQAGARLCPTVQLE  
DIPNLQGLTPLKLAAKEGKIRIFSHILQREFSGPSQRLSRKFTEWCYGPVRSVLYDLASV  
DSWEENSVEIIAFHCKSPHRHRMVVLEPLNKLKQEKWDLLIPRFFLNFLCNLIYMLIF  
TTVAYHQPALKKQADSHLKAEVGNSMLLAGHIIILLGGLYILVGQLWYFWRRHLFVWI  
WFIDSYFEILFLLQALLTVLSQVLCFLAIEWYLPLLVSAVLGWLNLLYYTRGFQHTGIY  
SVMIQKVILRDLLRFLLVYLVFLFGFAVALVSLSQEAWRPEAPTGSNATESLQPVGQK  
DKENTSPYGNILEASLELFKFTIGMGELAFEEQLHFRGMVLLLLLAYVLLTYILLNMLI  
ALMNETVNSVATDSWSIWKLQKAISVLEMENGNWWYRKKQRRAGVMLTVGTKADD  
SPDERWCFRVEEVNWAWEQTLPTLCEDPGADVPRTLKNPVLASPPKDEDGAAEE  
DHVSLQQLQSS-----  
-----

>TRPV2\_Canis\_familiaris

MASPSSTFRLETSDDGGQEDGSEVDKRRKAGPGAGPPPMESPFQGEDRKCSPQIKVNL  
NFRKGAGVSQDPNRFDRDRLFSVVARVPEDLAGLPEYLSRTSKYLTDSSEYTEGSTG  
KTCLMKAVLNLRDGANACILPLLQIDRNSGNPQPLVNAQCTDEYYRGHSALHIAIEKR  
SLQCVKLLVENGANVHAQACGQFFQKKSQGTCFYFGELPLSLAACTKQWDVVTYLLE  
NPHQPASLQAADSLGNTALHALVMIADNSAENSALVIRMYDALLRAGARLCPKVQLE  
DIPNLQGLTPLKLAKEGKIEIFRHILQREFSGPCQSLSRKFTEWCYGPVRSVLYDLASV  
DSWEENSVLEIIAFHCRSPHRHRMVVLEPLNKLQAKWDLLIPRFFFNFLCYLTYMFI  
FTAVAYHQPALGKAFLPPTVTTGDSMLLLGHILILLGGVYLLVGQLWYFWRRRLFIWI  
SFVDSYFELLFLVQALLTVLSQGLCFLAVEWYLPLLSSLVLGWLNLLYYTRGLQHTGI  
YSVMIQKVILRDLLRFLVYLVFLFGFAVALVSLSREARDSGVPTGPNVTEAAQSGAGQ  
GDEEGSSSPYGGILDASLELFKFTIGMGELAFQDQLRFRGVVLLLLLAYVLLTYILLNM  
LIALMSETVNSVASDSWSIWKLQKAISVLEMENGYWWCRRKKQRAGVKLTVGTRPD  
GSSDERWCFRVEEVNWAWEQTLPTVCEEPSGPAVPGSIRNPVLASQPEEDTASEED  
QLPLQLLKS-----  
-----  
-----

>TRPV2\_Cricetulus\_griseus

MTSPSSPPAFRLETSDDGDQEDSAEVDKGRNEPPPMESPFQGEDRNFSPQIKVNLNYRK  
GRGASQQDPNRFDRDRLFSVVSARGVPEELAGLREYLCRTSKYLTDSAYTEGSTGKTCL  
MKAVLNLDQGVNACILPLLQIDKDSGNPQPLVNAQCTDEFYRGHSALHIAIEKRSLQC  
VKLLVENGANVHIRACGRFFQKHPGTCFYFGELPLSLAACTKQWDVVTYLLENPHQP  
ASLEATDSLGNLTVLHALVMIADNSPENSALVIHMYDGILQVGARLCPTVQLEDICNNQ  
GLTPLKLAKEGKIEIFRHILQREFSGLYQPLSRKFTEWCYGPVRSVLYDLSSVDNWEM  
NSVLEIIAFHCRSPHRHRMVVLEPLNKLQEKWQRLIPRFFNFACYLAYMLIFTIVAY  
HQPSLEKPAVPSSKATFGESMLLLGHILILLGGIYLLLGQLWYFWRRRLFIWISFMSY  
FEILFLVQALLTVLSQVLRFMETEWYLPLLSSLVLGWLNLLYYTRGFQHTGIYSVMIQ  
KVILRDLLRFLVYLVFLFGFAVALVSLSREAQSPKAPADNNTTVTEQPMLGQEEEEAA  
PYGGILDASLELFKFTIGMGELAFQEQLRFRGVVLLLLLAYVLLTYVLLLNMLIALMSET  
VNSVATDSWSIWKLQKAISVLEMENGYWWCRRRKHRSRLLKVGTRWDGVPDERW  
CFRVEEVNWAWEKTLPTLSEDPGEGILGYDKNPASKSGKNSVSEEDHPLQVLQSQ  
-----  
-----  
-----

>TRPV2\_Dipodomys\_ordii

MTSPSSPPAFRLETSDDGDQEDGTEAVKKGKPGPPPMESPFQGEDRNFSPQIKVNLNYRK  
GLKARQQDPNRFDRDRLFSIVSRGASEDLAGLLEYLRRTSKYLTDSSEYTEGSTGKTCL  
MKAMLNLQGVNACILPLLQIDRDSGNPQPLVNAQCTDEYYRGHSALHIAIEKRSLQCV  
KLLVENGANVHARACGHFFQKHQGTCFYFGELPLSLAACTKQWDVVTYLLENPYQPA  
SLQAADSLGNTALHALVMIADNSPENSALVIRMYDGLLQLGARLCPTVQLEDIHNLQG  
LTPLKLAKEGKIEIFRHILQREFSGLCQPLSRKFTEWCYGPVRSVLYDLASVDSWEEN  
SVLEIIAFHCRSPHRHRMVVLEPLNKLQAKWDLLIPRFFLNFLCYLVYMLIFTIVAYH  
QPALDKQALSPMKATAGNSMLLFGHVLILLGGIYLLLGQTWYFWRRRLFIWISFMSY  
FEILFLVQALLTVLSQVLCFVNNEWYLPLLSSLVLGWLNLLYYTRGFQHTGIYSVMIQ  
KVILRDLLRFLVYLVFLFGFAVALVSLSREAQITGVPTGDNATEAAQLSAGQEKEETP  
YRGILDASLELFKFTIGMGELAFQEQLRFRGVVLLLLLAYVLLTYVLLLNMLIALMSETV



NSVATDSWSIWKLQKAISVLEMENGYWWCRRKKQRAGVMLTVGTRPDGSPDQRWC  
FRVEEVN WASWEQTLATVCEEPSGAGISGSSKNPISSSQPVEDQDRDSEKDHLPLQVL  
QSH-----  
-----  
-----

>TRPV2\_Tursiops\_truncatus

MSSPSSPPAFRLETSDGGQEDGAQVDKGLGSGAGPPPMESPFQGEDRNFSPQIKVNL  
SFRKGAGQPARNRFDRLFSVVARVPEDLVGLPEYLRRTSKYLTDSEYTEGSTG  
KTCLMKAVLNLRDGTNACIEPLLQIDRDLGNPRPLVNAQCTDEYYRGHSALHIAIEKR  
SLPCVKLLVENGADVHARACGQFFQKKSQETCFYFGEMPLSLAACTKQWDVVTYLLE  
NPHQPASLQAADSLGNTALHALVMIADDAENSTEMVTRMYDGLLQAGARLCPTVRL  
EDIPNLQGLTPLKLAKEGKIEGRARSLRSLALPWCLHVYLLNAPLALAFPSQHRH  
RMVVLEPLNKLQVKWNLLIPRFLFNFLCYLTYMSIFTAVTYHQPALDKARQGGAH  
GEASWKQSWYFWRRLFIWISFMDSYFEILLVQALLTVLSQVLCFLAIEWYLPLLVC  
SLALGWLNLLYYTRGLQHTGIYSVMIQKVILRDLRFLLVYLVFLFGFAVALVSL  
SQEARS PKAPQAQLRFRGVALLLLLTHVLLTYVLLLNMLVALMSETVSNVASDS  
WSIWKLQKAI SVLEMENGYWWCRRKKQRAGVRLTVGTRPDGLPDERWCFRVEE  
EVNWAWEQTL PTVREEPSGGFTGALKNPALASQSSQDSAVEEDHVPLQLLESH-----  
-----  
-----

>TRPV2\_Spermophilus\_tridecemlineatus

MTSPSSPPAFRLETSDQNQEDGAEVDRGKHGPPPMESPFQGEDRNFSPQIKVNLN  
YR KGLGPSQDPNRFDRDLFSVVTRGAPEDLAGLQEYLNRTSKYLTDSEYTEGSTG  
KTC LMKAVLNLDQGVNACILPLLQIDRDSGNPQPLVNAQCTDEYYRGHSALHIAIEKR  
SLQ CVKLLVENGADVHARACGHFFQKRQGTCTFYFGELPLSLAACTKQWDVV  
TYLLENPHQ RASLQAADSLGNTALHALVMIADNSKENSALVIHMYDDLLQAGAR  
LCPTVQLEDICNL EGLTPLKLAKEGKIEIFRHILQREFSGLCQPLSRKFTWCYGP  
VRVSLYDLASVDSWE ENSVLEIIAFHCKSPHRHRMVVLEPLNKLQAKWDM  
LIPRFFNFLSYLIYMLVFTAV AYHQPAALEKQAFPLKATGGNSMLLLGHILIL  
LGGIYLLGGQLWYFWRRLFIWISFVD SYFEILFLLQALLTVLSQVLCFMAI  
EWYLPLLVSSLVLGWLNLLYYTRGFQHTGIYSVMI QKVILRDLRFLLVYLV  
FLFGFAVALVSLREARDSGTPAGNNATEVAQPGEQENEA TPYRGILDASLE  
LFKFTIGMGELAFQEQLRFRGVVLLLLLAYVLLTYVLLLNMLIALMSE TV  
NNVATDSWSIWKLQKAICVLEMENGYWWCRRKKQRAGVLLKVGTRPDGTP  
DER WCFRVEEVN WASWEQTLSTVREEPSSEGNAPGSMKNPILASQPGEDH  
ASKEDHLPLQ VLQSH-----  
-----  
-----

>TRPV2\_Equus\_caballus

MTSPSPDLFRLETSDDEVQEEDAKVDKGLGHGDGPPPMESPFQGEDRNFSPQIKV  
NLK YRKGAGASQDPNRFDRDLFSVSRGVPEDLAGLPEYLRRTSKYLTDSEYTE  
GSTGKTCLMKAVLNLRDGANACILPLLQIDKDSGNPRPLVNAQCSDEYYRGHS  
ALHIAIEKRSLQCVKLLVENGADVHARACGHFFQKKSQGTCTFYFGELPLSL  
AACTKQWDVVTYLL

ENPHQPANLQAADSLGNTALHALVMIADNSEENSALVIWMYDGLLRAGARLCPAVQL  
EDIPNLQGLTPLKLAAKEGKIEIFRHILQREFSGPCQPLSRKFTEWCYGPVRSVLYDLAS  
VDSWEENSVLEIIAFHCRSPHRHRMVVLEPLNKLQAKWDLIPRFFNFVFCYLIYMFIF  
TAVAYHQPALEKQAFSPMKVTAGNSMLLLGHILILLGGVYLLVGQLWYFWRRLFIWI  
SFMDSYFEILLVQALLTVLSQVLCFLAVEWYLPVSSLVLGWLNLLYYTRGLQHTGIY  
SVMIQKVLRLDLLRFLLVFLVFLGFAVALVSLVSLREAWVPQVPTGPNVTEAVQSGAGQ  
HDEEGSTAPYRGILDASLELFKFTIGMGELAFQDQLRFRGVVLLLLLAYVLLTYILLLN  
MLIALMSETVNSVATDSWSIWKLQKAISVLEMEKGYWWCRRKKQRAGVLLTVGTRP  
DGSPDERWCFRVEEVNWAWEQTLPTVCEEPSGSSGAGTMKNPALTSQPGEESASE  
GDQLPLQLLESH-----  
-----

>TRPV2\_Homo\_sapiens

MTSPSSSPVFRLETLDGGQEDGSEADRGKLDGSGLPPMESQFQGEDRKFAPQIRVNL  
NYRKGTTGASQPDPNRFRDRDLFNAVSRGVPEDLAGLPEYLSKTSKYLTDSEYTEGSTG  
KTCLMKAVLNLDKGVNACILPLLQIDRDSGNPQPLVNAQCTDDYYRGHSALHIAIEKR  
SLQCVKLLVENGANVHARACGRFFQKGQGTCTFYFGEPLSLAACTKQWDVVSYLEN  
PHQPASLQATDSQGNLTVLHALVMISDNSENALVTSMYDGLLQAGARLCPVQLEDI  
RNLQDLTPLKLAAKEGKIEIFRHILQREFSGLSHLSRKFTEWCYGPVRSVLYDLASVDS  
CEENSVLEIIAFHCKSPHRHRMVVLEPLNKLQAKWDLIPKFFLNFLCNLIYMFIFTA  
VAYHQPTLKKQAAPHLKAEVGNMMLTGHILILLGGIYLLVGQLWYFWRRHVFIWISFI  
DSYFEILFLFQALLTVVSQVLCFLAIEWYLPVLSALVLGWLNLLYYTRGFQHTGIYSV  
MIQKVLRLDLLRFLLIYLVFLGFAVALVSLVSLQEAWRPEAPTGPNATESVQPMEGQEDE  
GNGAQYRGILEASLELFKFTIGMGELAFQEQLHFRGMVLLLLLAYVLLTYILLNMLIAL  
MSETVNSVATDSWSIWKLQKAISVLEMENGYWWCRRKKQRAGVMLTVGTPDGSPD  
ERWCFRVEEVNWAWEQTLPTLCEPDSGAGVPRLENPVLASPPKEDEDGASEENYV  
PVQLLQSN-----  
-----

>TRPV2\_Ictidomys\_tridecemlineatus

MTSPSSPPAFRLETSDQNQEDGAEVDRGKHGPPPMESPFQGEDRNFSPQIKVNLNYR  
KGLGPSQPDPNRFRDRDLFSVVTRGAPEDLAGLQEYLNRTSKYLTDSEYTEGSTGKTC  
LMKAVLNLDKGVNACILPLLQIDRDSGNPQPLVNAQCTDEYYRGHSALHIAIEKRSLQ  
CVKLLVENGADVHARACGHFFQKRQGTCTFYFGEPLSLAACTKQWDVVTYLLENPHQ  
RASLQAADSLGNTALHALVMIADNSKENSALVIHMYDDLLQAGARLCPVQLEDICNL  
EGLTPLKLAAKEGKIEIFRHILQREFSGLCQPLSRKFTEWCYGPVRSVLYDLASVDSWE  
ENSVLEIIAFHCKSPHRHRMVVLEPLNKLQAKWDMIPRFFNFVFCYLIYMLVFTAV  
AYHQPALEKQAFPLKATGGNSMLLLGHILILLGGIYLLVGQLWYFWRRLFIWISFVD  
SYFEILFLLQALLTVLSQVLCFMAIEWYLPVSSLVLGWLNLLYYTRGFQHTGIYSVMI  
QKVLRLDLLRFLLVFLVFLGFAVALVSLVSLREARSDGTPAGNNATEVAQPGTEQENEA  
TPYRGILDASLELFKFTIGMGELAFQEQLRFRGVVLLLLLAYVLLTYVLLNMLIALMSE  
TVNNVATDSWSIWKLQKAICVLEMENGYWWCRRKKQRAGVLLKVGTRPDGTPDER  
WCFRVEEVNWAWEQTLSTVREEPSEGNAPGSMKNPILASQPGEDHASKEDHLPLQ  
VLQSH-----  
-----

-----  
-----  
>TRPV2\_Echinops\_telfairi\_fragment

MTAPARGPAFRLETS DGGQEDGTEGDKGNLGHGDGPPPMESPFQGEDRNFSPQIKVN  
LNYRKGQSASKPDRDRDLFSVVS RGVPEGLAGLAEYLRKTSKYLTDSEYTEGSTG  
KTCLMKALLNLQDGTNACILPLLRIDKDSGNPWALVNAQCTDDYYRGHSALHIAIEKR  
SLPCVKLLVENGADV HARACGHFFQKKSQGACFYFGELPLSLAACIKQWDVVVTYLLEN  
PHQPASLQATDSLGN TVLHALVMIADNSAENSALVIRMYDALLRTSTRLCPTVRLEDI  
PNRQGLTPLSWSAKEGKIELNKLLQPKWELLTPKFYINLLSYLVYMIIFTAVAYHQPAL  
EKVRPGWHPLKPTAGNSMLLLGHILILLGGLYLLFGQLWYFWRRRFIWFISFMDSYFEV  
LLLQALLTVLSQVLCCLAIEWYLPLLVSSLV LGWLNLLYYTRGFQHTGIYSIMIQQKAI  
SVLEMENGYWWYRQKKQRAGVMLKVGTQLD GSPDERWCFWVVEEVNWDSEWKTLP  
TVCEEPAGA QVLGTTKNPTRSSQHEEDHASEEDHLPLQLQ-----  
-----  
-----  
-----

>TRPV2\_Loxodonta\_africana

MTSPSSPPVFRLETS DGGQEDGTEGDRRNLGHGDGPPPMESAFQGEDRNFAPQIKVN  
LIYRKGSGACQPDRDRDRDLFN VVS RGAMEELAGLPEYLSWTSKYLTDSEYTEGST  
GKTCLMKAMNLQEGTNACILPLLQIDRDSGNPRPLVNAQCTDEYYRGHSALHIAIEK  
RSLPCVKLLVENGADV HARACGHFFQKQSQGACFYFGELPLSLAACTKQWDVVVTYLL  
ENPHQPASLQAADSLGN TVLHALVMIADNSAENSALVIRMYDALLRAGARLCPSVNLE  
DIPNLQGLTPLKLAAKEGKIEIFRHILQREFEGQCQPLSRKFTEWSYGPVRSVSLYDLASV  
DSWEENS VLEIIAFHCRSPHRHRMVVLEPLNKLLQRKWELLAPKFYFNFLCYLVYMI  
FTTVAYHQPALEKQAFPPLKATAGNSVLLLGHVLILLGGLYLLLGLWYFWRRRLFIV  
LSFMDSYFEILYLFQALLTVLSQVLCCLAIEWYLPLLVSSLV LGWLNLLYYTRGFQHTG  
MYSVMIQKVILRDLLRFLLVYFVFLFGFAVALVSLRETQGPKAHTGLNATEAAHDGA  
APYGGILDASLELFKFTIGMGE LAFQEQLRFRGVVLLLLLAYVLLTYILLNMLIALMSE  
TVNSVATDSWSIWKLQKAISVLEMEGGYWWCRPKKQRVGVMLTVGTRPDGSPDER  
WCFRVEEVN WATWEQTLPTVLEEPAGAPVPGTTKTPTLASQHEEGRASEEDHLLLQ  
PLGPH-----  
-----  
-----

>TRPV2\_Sus\_scrofa

MASPSSPPAFRLETS DRSREDGAERDRGQPGGGARPPPMESAFQPEDRMFPPQITVDL  
HYRKRAGASQPDPNRFRDRDLFRV VARGVPEDLAGLPEYLRRTSKYLTDTEYREGST  
GKTCLMKAVLNLRDGANACIQPLLQIDRDSGNPQPLVNAQCTDAYYRGHSALHIAIEK  
RSLPCVKLLVENGADV HARACGQFFQKKSQDPCFYFGELPLSLAVCTKQWDVVVTYLLE  
NPHQSASPQAADSLGN TALHALVAIADNSVKNTLVTLMYDKLLQAVARLYPTVRLE  
DIPNLQGLTPLQLAAKEGKIEIFRHILQREFPGPCQSLSRKFTEWSYGPVRSVSLYDLASV  
DSWEENS VLEIIAFHCRSSDRHRMVVLEPLNKLLQEKWNLLTPRFLINFLCYLIYVSVL  
TATYHQPALEKCLSKQDLLTLGNSTLLLGHILILLTGAYLLMGQLWYFWRRRLFIVTS

FVDSYFEILFLVQALLAVLSQVLCFLAVKWYLP LLVSSLVLGWLNL LYYTRGLQHTGIY  
SVMIQKVILRDLLRFLLVFLVFLFGFAVALVSL SREAQALGAPLGSNATEAAGEGDKEG  
SEALYKILDASLELFKFTIGMGELAFQEQLRFRGVVLVLL LAYVLLTYVLLLNMLIAL  
MSETVNSVAHDSWSIWKLQKAICVLEMEKGYWWCRRKKQRAGVKLTVGTRPDGSP  
DERWCFRVEEVNWA AWEQTLPTVCEEPSGPPGSSGDTNEPLASQPSQDSVTEEDNV  
PLQPLESR-----  
-----  
-----

>TRPV2\_Monodelphis\_domestica

MPEPARVPAFRLETTDSEEGGSTAAAASATGERGSRDQLPPMESAFQKENKDFAPQIK  
VNLNYRKGVSPPSPTDPNRFDRDLFNAV LGGAPDSLEGLLEYLMLTSKYLTDSEFTEA  
STGKTCLMKAVLNLKDG MNGCILPLLQIDHATRNPQPLINAVCIG EYYKGHSALHIAIE  
KRSLQCVKVLVENGADLHAKASGSFFGKENRGVCFYFGELPLSLAACTRQWDIVSYLL  
ENPDPDRRACIEAVDTWGNTVLHALVMIADDSVENSAQVNSMYDYILQIGARLWPSL  
KLENLTNLQGLTPLKLA AKEGKIQVFKHILQREISGEYRHLSRKFT EWTYGPVQVSLYD  
LSSVDSCEDNSVLEIIAFGCKAPNRHKMVTLEPLNKLLQEKWESLAARFRFN LISYFLY  
MLIFTAVTYHQPV LGKNFIPLKATVGNM LLMGHIFILFGGVYLFFGQLQYFWRRRLF I  
WTSFIDSYFEILILIQALFSVLAQVLCFLELSWYLPFLV FSLVLGWINVLYYTRGFQQTGI  
YSVMIQKVILRDLLRFLLVYFVFLFGFAIALVSLTREGPLPAVFNQTAAA AVAEEEEAK  
VPYSGFVEASLELFKFTIGMGELEFHKELQFKGFVMFLL LAYVLLTYILLNMLIALMSE  
TVNSVATDSWSIWKLQRAISVLEMERGYWWCKRKKERSGILLTVGTTLDQK PDERW  
CFRVEEVNWATWEKELQTLKEEPEGTSEP GKGP TGESAPRPTTSLE-----  
-----  
-----

>TRPV2\_Normascus\_leucogenys

MTSPSSSSVFRLETLDGGQEDGSEVDSRKPDFGSGLP PMESLFQGEDRKFAPQIKVNL  
NYQKGTGVSQPDPNRFDRDLFNAVSRGVPEDLAGLPEYLSKTSKYLTDSEYTEGSTA  
KTCLMKAVLNLKDG V NACILPLLQIDRDSGNPQPLVNAQCTDDYYRGHSALHIAIEKR  
SLQCVKLLVENGANVHARACGRFFQKGQGTCFYFGELPLSLAACTKQWDVVS YLLEN  
PHQPASLQATDSQGN TVLHALVMISDNSAENVALV TSMYDGLLQAGARLCPTVQLEDI  
RNLQDLTPLKLA AKEGKIEIFRHILQREFSGLSHLSRKFT EWWCYGPVRVSLYDLASVDS  
CEENSVLEIIAFHCKSPHRHRMVVLEPLNKLLQAKW D LLIPRFFLNFLCNLIYMFIFTA  
VAYNQPTPKKQAAPHLKAEVGNM LLAGHIFILLGGIYLLMSQLWYFWRRHLFIWISF  
IDSYFEILFLFQALLTVVSQVLFFLAIEWYLP LLVSALVLGWLNL LYYTRGFQHTGIYSV  
MIQKVILRDLLRFLLIYLVFLFGFAVALVSLSQEAWRPEAPTGP NATELVQPAEGQEDE  
GNGVQYRGILEACLELFKFTIGMGELAFQEQLHFRGMV LLLL LAYVLLTYILLNMLIA  
LMSETVNSVATDSWSIWKLQKAISVLEMENGYWWCRKKQRAGVMLTVGTKPDGSP  
DERWCFRVEEVN WASWEQTLPTLCEDPGAVVPRTLENPVLASPPKEDEDGASEEN  
DVPSKLLQSN-----  
-----  
-----

>TRPV2\_Ornithorhynchus\_anatinus

MPEPARPTVFMLETTDSSPEERANASARPEGKGRKNELPPMESAFQKENSDFTPSIRV  
NVNYHPSSPPPGLPILNQDPNRFDRDLFGAVARGDPEELEGLKEYLQRTGKFLTN  
SEYKVGSEGRAWNMNMVSSLVEGVFLMPTEYVLEESHVTVIIIITLGSASPFVSLGHSAL  
HIAIEKRSLTWVKVLVENGANVHAKADGQFFQKSKGICFYFGELPLSLAACTKQWDVV  
EFLLENPHQPARLEEGDSQGN TVLHALVMIADNSKENTSLVSAMYDDILRAGARICPS  
MKLEDIPNNQGLTPLKLAAKEGKIEIFKHILQREMSGEYQHLSRRFTEWSYGPVQAAL  
YDLSSVDSSSEDNSVLDIIVFGCRAPNRHKMVVLEPLNKLLQEKWESLAIRFYFNFACYV  
IYMMIFTAVAYHQPVLGKTFPLKATAGNSMLLMGHILILFGGFYLLFFGQLRYFWKRH  
RFLWITFVDSYFEILILVQSLTTVVAQVLCFMELEWYLPVLVFSLVVGVVNTLYYTRGF  
EPTGIYSVMIQKVILRDLLRFLLIYFVFLFGFAVALVSLTREALPLPPLNTSLTHPEVGGG  
NDDDGTKSYSSMFAASLELFKFTIGMGELEFQEHLRFKGFVMFLLL VYVLLTYILLNM  
LIALMSETVNSVSTDSKSIWKLQRAIAVLEMEMGYWWCRRKKKRSRGTFLT VGVTPDQ  
KTDERWCFRVEEVNWAMWERELQALKEDPGDCRDLVKNPTGKAWKRLSTQRPE  
DSTPEEDQPLRP-----  
-----  
-----

>TRPV2\_Oryctolagus\_cuniculus

MTSPSSPPAFRLETS DGGQDGA EVDKAQLGYGAGPPPMESRFQDED RNFPPQIKVNL  
NYRKGAGASQPDLNRFDRDLFNVVARGNPEDLAGLLEYLRRTSKYLT DSEYTEGSTG  
KTCLMKAVLNLQDGVNACIQP LLEIDRDSGNPQPLVNAQCTDEYYRGHSALHIAIEKR  
SLQCVKLLVENGANVHAKACGHFFQKNQDTCFYFGELPLSLAACTKQWDVVNYLLEN  
PHQPASLQAQDSLGN TVLHALVMIADDSAENSALVVRMYDGLLQAGARLCPNVQLEG  
IPNLEGLTPLKLAAKEGKIEIFKHILQREFSAPCQSLSRKFTEWCYGPVRSYLDLASVD  
SWEENSVLEIIAFHSRSPHRHRMVVLEPLNKLLQAKWDR LIPRFCFNFLCYLVYMLIFT  
AVAYHQPALEKQGFPPLKATAGNSMLLLGHILILLGGVYLLLGQLWYFWRRLFIWIS  
FMDSYFEILFLLQALLTVLSQVLCFLAIEWYLP LLVSSLVLGWLNNLLYYTRGFQHTGIYS  
VMIQKVILRDLLRFLLVYLVFLFGFAVALVSLSREAQNSRTPAGPNATEVGGQPGAGQED  
EAPPYRSILDASLELFKFTIGMGELAFQEQLRFRGVVLLLLL LAYVLLTYVLLLNMLIALM  
SETVNSVATDSWSIWKLQKAISVLEMENGYWWCRRKKQRAGVMLTVGTRPDGSPDE  
RWCFRVGMNWATWEQTL PRTLCEEPSGAAAPGVMKNPTPASQRGEDSASEEDHL  
PLQLLSR-----  
-----  
-----

>TRPV2\_Sarcophilus\_harrisii

MPEPAQGPAFRLETTEGDQGGGSAAAAAGERGSRDQLPPMESEFQKESTDFSPQIKV  
NLNYRKGMGPSPTDPNRFDRDLFNAVVGGNPESLDGLLGYLLLTSKYLT DSEFTDAS  
TGKTCLMKAVLNLREGMNACILPLLQIDLATRN PQPLINAVCTGDYYKGHSAHIAIEK  
RSLECVKVLVENGADLHARARGSFFGKERQGICFYFGEW TGLSLD TTGQSWGWMVPY  
FLNKG NPSNGHPKEAIDVLCFSVNFYELFQSTLFPRESLVIKKREKSVQLLFQPCDWR  
PLRSM AVVPWRVTDPHSWPEVFKHILQREISGEYRHLSRK FTEW TYGPVQVSLYDLS  
SVDSCEDNSVLEIIAFGCKAPNRHKMVTLEPLNKLLQEKWESLVTRFRFN LISYFLYMV  
IFTIVTYHQPV LGKNFIPMKATVGN SMLLMGHIFILFGGVYLLFFGQLQYFWRRLFIWT  
SFIDSYFEILILS QALTSVVAQVLCFLELSVYLPVLVFSLV LGWINLLYARGFQQTGIYSV  
MIQKVILRDLLRFLLVYFVFLFGFAIALVSLSREAPLPTFSNQSLAGADKPPYGGLEAS  
LELFKFTIGMGELEFHKELQFE GFIMFLLLAYVLLTYILLNMLIALMSETVNSVATDS

WSIWKLQRAISVLEMERGYWWCKRKKERSGILLTVGTTDPKKPDERWCFRVEEVNW  
ATWEKELQTLKEEPESTLEMGKTLPVLLRDGKGIRAQEQHPPPHLKTLLTH-----  
-----  
-----

>TRPV2\_Pan\_troglodites

MTSPSSSPVFRLETLDGGQEDGSEADRGKLDGSGLPPMESQFQGEDRKFAPQIRVNL  
NYRKGTGASQDPNRFDRDLFNAVSRGVPEDLAGLPEYLSKTSKYLTDSEYTEGSTG  
KTCLMKAVLNLKDGVNACILPLLQIDRDSGNPQPLVNAQCTDDYYRGHSALHIAIEKR  
SLQCVKLLVENGANVHARACGRFFQKGQGTCTFYFGELPLSLAACTKQWDVVSYLEN  
PHQPASLQATDSQGNLTVLHALVMISDNSEAENIALVTSMYDGLLQAGARLCPTVQLEDI  
CNLQDLTPLKLAKEGKIEIFRHILQREFSGLSHLSRKFTIEWCYGPVRSVLYDLASVDS  
CEENSVLEIIAFHCKSPHRHRMVVLEPLNKLQAKWDLIPKFFLNFLCNLIYMFIFTA  
VAYHQPTLKKQAAPHLKAEVGNMMLLTGHILILLGGIYLLVGQLWYFWRRHVFIWISFI  
DSYFEILFLFQALLTVVSQVLCFLAIEWYLLVLSALVLGWLNLNLLYYTRGFQHTGIYSV  
MIQKVILRDLLRFLLIYLVFLFGFAVALVLSQEAWRPEAPTGNATESVQPLEGQEDE  
GNGAQYRGILDASLELSKITIGRGELDFQEQLHFRGMVLLLLLAYVLLTYILLNMLIAL  
MSETVNSVATDSWSIWKLQKAISVLEMENGYWWCRKKQRAGVMLTVGTPDGSPD  
ERWCFRVEEVNWASWEQTLPTLCEDPGAGVPRTLENPVLASPPKEDEDGASEENYV  
PVQLLQSS-----  
-----  
-----

>TRPV2\_Pongo\_abelii

MTSPSSSPVFRLETLDGGQEDGSEADRGKLDGSGLPPMESQFQGEDRKFAPQITVNL  
NYRKGAGASQDPNRFDRDLFNAVSRGVPEDLAGLPEYLSKTSKYLTDSEYTEGSTG  
KTCLMKAVLNLKDGVNACILPLLQIDRDSGNPQPLVNAQCTDDYYRGHSALHIAIEKR  
NLQCVKLLVENGANVHARACGRFFQKGQGTCTFYFGELPLSLAACTKQWDVVSYLEN  
PHQPASLQATDSQGNLTVLHALVMISDNSEAENIALVTSMYDGLLQAGARLCPTVQLEDI  
RNLQDLTPLKLAKEGKIEIFRHILQREFSGLSHLSRKFTIEWCYGPVRSVLYDLASVDS  
CEENSVLEIIAFHCKSPHRHRMVILEPLNKLQAKWDLIPKFFLNFLCNLIYMFIFTAV  
AYHQPTLKKQAAPHLKAEVGNMMLLTGHILILLGGIYLLVGQLWYFWRRHVFIWISFI  
DSYFEILFLFQALLTVVSQVLCFLAIEWYLLVLSALVLGWLNLNLLYYTRGFQHTGIYSV  
MIQKVILRDLLRFLLIYLVFLFGFAVALVLSQEAWRPEAPTGNATESVQVEGQEDE  
GNGAQYRGILEASLELFKFTIGMGELAFQEQLHFRGMVLLLLLAYVLLTYILLNMLIAL  
MSETVNSVATDSWSIWKLQKAISVLEMENGYWWCRKKQRAGVMLTVGTPDGSPD  
ERWCFRVEEVNWASWEQTLPTLCEDPGAGVPRTLENPVRASPPKEDEDGASEENY  
VPLQLLQSN-----  
-----  
-----

>TRPV2\_Otolemur\_garnettii

MTSPSSPPVFRLETSDGDREDGAEVDKKGKPGFGSGPPMESPFQGEDRNFPHQIKVNL  
NYRKKAGASQDPNRFDRDLFSVVSARGVAEDLAGLREYLRRTSKYLTDSEYTEGSTG  
KTCLMKAVLNLQDGVNACILPLLQIDRDSGNPRPLVNAQCTDEYYQGHSAHIAIEKR  
SLQCVKLLVENGADVHARACGQFFQKGQGTCTFYFGELPLSLAACTKQWDVVSYLDDN

EHQRASLQATDSLGN TVLHALVMIADNSKENS DLVTHMYDKLLKAAADTDHTVQLE  
DIRNLQGLTPLKLA AKEGKIEIFRHILQREFPGPYQALS RKFTWCYGPVRSVLYDLAS  
VDSWEENS VLEIIAFHCRSPHRHRMVVLEPLNKLLQEKWDLLIPRFFNF LCYLTYML  
VFTAVAYHQ PALNKALLPLKATAGNSMLLLGHILLLGGICLLL GQLWYFWRRLFIWI  
SFMDSYFEILFLVQALLTVLSQVLCFLAISWYLPLL VSSLVLGWLNL LYYTRGFQHTGM  
YSVMIQKVILRDLLRFLLVYL VFLFGFAVALVSL SREALDPRPTVGP RPTVGPNTTEAA  
GQPGAGQEDEEGVEVPYRGILDASLELFKFTIGM GELAFQEQLRFRGVV LLLLLL LAYVLL  
TYVLLLNMLIALMSETVNRVTNDSWSIWKLQKAISVLEMENGYWWCRRRKQRAGVR  
LTVGTRPDGSPDERWCFRVEEVNWA AWEQTLRTVCEEPSGTGAPGTTKDLTLASRP  
QEAGALEEDH LPLQLLQSH-----  
-----  
-----

>TRPV2\_Mus\_musculus

MTSASNPPAFRLETS DGDEEGSAEVNKGKNEPPPMESPFQGEDRNFSPQIKVNLNYR  
KGLGPSQQDPNRFDRDRLFSVVS RGVPEELTGLLEYLRRTSKYLTD SAYTEGSTGKTCL  
MKAVLNLQDGVNACILPLLQIDRDSGNPQPLVNAQCTDEFYRGHSALHIAIEKRSLWC  
VKLLVENGANVHIRACGRFFQKHQGT CFYFGELPLSLAACTKQWDVV TYLLENPHQP  
ASLEATDSLGN TVLHALVMIADNSPENSA LVIHMYDSLLQMGARLCPTVQLEDICNHQ  
GLTPLKLA AKEGKIEIFRHILQREFSGLYQPLSRKFTEWCYGPVRSVLYDLSSVDSWEK  
NSVLEIIAFHCKSPHRHRMVVLEPLNKLLQEKWDRLIPRFFNFACYL VYMIIFTIVAY  
HQPSLEQPAIPSSKATFGDSMLLLGHILLLGGIYLLL GQLWYFWRRLFIWISFMDSYF  
EILFLVQALLTVLSQVLRVETEWYLP LLVSSLVLGWLNL LYYTRGFQHTGIYSVMIQK  
VILRDLLRFLLVYL VFLFGFAVALVSL SREARSPKAPEDSNTTVTEKPTLGQEEEPVYQ  
GILDASLELFKFTIGM GELAFQEQLRFRGVV LLLLLL LAYVLLTYVLLNMLIALMSETVNS  
VATDSWSIWKLQKAISVLEMENGYWWCRRKRHRAGRLLKVGTKGDGIPDERWCFRV  
EEVNWAAWEKTLPTLSEDPGAGITGYKKNPTSKPGKNSASEEDH LPLQLVLSH-----  
-----  
-----

>TRPV2\_Oryzias\_latipes\_fragment

GQETAEPMDTDYHEEKEKPAPQLRFNLGFDK LARGKEQNKRDRFRTRDLLFEAAAS  
GDVQKLEGLDYLR LNMKNLSDSLCKYQSYGKTPLIKALMHLKDGK NKTVEIFINTAK  
NIGDLEKFNAAHTSNYYKGQTALHVAIERRSLPYVQLLVN SHADVHAKVSGKFFQPH  
DGPCFYFGELPLSLAACTNQPEMVDYLLKNEIQRADPEQRDSHGNTV LHALVAVADN  
SKENTEFINSMYDRILKITAKLHPKKKLEDIKNNKGLSPLLMAAKTGKIGVFSHILKRE  
FHESDIKHL SRKFTEWVYGPVHC SLYDLASV DSCENNSLLEILYIGSDIPNRHEMLQTE  
PLSQMLQAKWKKFAGGMFLINFLVYSLYLTIFTFVAHYIRGTA EYREFPFPLKSYDDYL  
FATGLLLTLLANLFLFIAGITDMWRKRPNM MTVLIDGYEILFCVQGLFYLCFAVLYVA  
GLKEYVCFVLVCLALS WVNVL YFSRGYQHMG IYSVMIQKII VCDILRFLFVYVFLFGFS  
AAVVTLLIVPPEKPRNATKGRSFFTQAPGEDCFIPTYKNFSFTVLELFKFTIGMDME  
FSQAFQYTEIFYFL LIGYIILTYILLNMLIALMNRVTENITKESTCIWKLQRAVTILDME  
KRLPYCLRKRLRCGVEKKLCTALGNDQRWCFRVEEVNWNKWNTDIGKIDEDP-----  
-----  
-----

>TRPV2\_Salmo\_salar

MSKSKGPEYPSFSLETDDRTDDERAQSRQVKKPDRLVSALGLGSSGGPKTPMDSYQ  
DELEEAAPKIRFNLNFDKEVRCLEENKEDRVSKRFDIKRLF EAVSTGDVMKLEGLHQY  
LHQSMKKLSNTEYQSYGKNVLLKALLNLRKGRNNTIEYLLDISEKMGDIKEFVNAAYT  
DSYYKGQTALHIAIERRSIYFVELLIKKGANVHAKACGKFFQAHDGPSFYFGELPLSLAA  
CTNQPEVVDFFLENDYQRVDVRESDSLGNMVLHALVVLADNTPENTDFITSMYDHIL  
TTTARLHPEWRLEDIENNQGLTTIKLAAKTGKIGLFGKHMHHREFQERETRHLRSRFT  
EWWYGPVHSSLYDLASLDSYEKNSVMEIIVYSSDIPNRHEMLQIEPLNRLLEEKWDF  
AARMFFLNFLVYLVYLSVFTAVAYNRKKGTPPFTLEHTRQEYLRLAGQLFITVGACYFF  
IRGILDLKRKRPSLDTLLIDGYSEILFFLQAIFFLASLVLYCCGREEYLGFLVLCALSWV  
NLLYFSRGRHMGIIYSVMIQMILSDILRFLVYVTFVFLGFSAAVVTLLMEPELPASNT  
AQPINSTDGKGRFTLPTEDSCIKPTFRNISHTIMELFKFTIGMGDLEFTEGYQYKEVFY  
MLLSYIVLTYILLNMLIALMSRTVEKMSLESTSIWKLQRAITILDRLSLPRCLRRRLR  
SGVDKDLGTRAGEKDRRWCFRVEEVNWNKWNNTNLGIINEDPGSGDTARLSPSHSSR  
TLGKERSWRGFLGNVSRQHTQPQHQQVESTEMSSLSPLSHV-----  
-----  
-----

>TRPV2\_Gasterosteus\_aculeatus

MEKSEIGFSLEADDRTEEERARQKASKKGGVASALGLGKEAPKVPMDTDYQEEMEKP  
KPQIRFNLNFDKGIRGEQRNKKDSSTFTIDRLF EAAASGDVKGLENLHQYLRQNTKKL  
SDSLYRSYGKTALMKALLHLRNGKNETVELLIDISEKMGDIKEFVNAAYTNYYKQGT  
ALHVAIERRNISYVKLLVSKGADVHAKAWGLFFQPHDGNFYFGELPLSLAACTNQPA  
VVDFLMENEYQRADAKMTDSHGNTVLHALVTVAASSKDQDKDNTEFITKMYDRILK  
TSAKLHPNLKLEGIENNKGLTPLKMAAKTGKIGLFTHILKREFHESHTKHLRSRKFTEW  
VYGPVQSSLYDLASVDSYEDCSVVEILVYGS DIPNRHAMLQMEPLSQLLEEKWNKFAG  
RMFFLNFLVYLVYLSIFTLVAYNKKVGQLPYPIEHTTKGYLYVSGQVVTAVANCYFFFI  
GILDMKRKRPKLQTLIDGYEFLFFVQGVFLITAVLYLCGKKQYLSFLVLCALSWV  
NMLYFSRGRHMGIIYSIMIQMILSDILRFLVYIVFLGFSAAVVTLLIEPEVKNSTLSQ  
PSKGRIFGPLDPGEECVKPSFTSISYTTLQLFKFTIGMGDMEFTQEHEENTE VFYLLLIGY  
IILTYILLNMLIALMNRTEKTTEESTSIWKLQRAITILEMEKRLSCCLRRRFRGVEK  
NLRTALGDDRRRCFRVEEVNWNKWNINLGKINEDP-----  
-----  
-----

>TRPV2\_Xenopus\_tropicalis

MSGTDSDGPPNGTLNFEFHDKDSQA AFDKADKNSDGKKEKKPPMNSAIQKESDNYS  
LIGINVNFLPKVTGHGKQPVLDP SQVYDRNRIFTAVTNGDTQDLAGLQNYLDKTMKR  
LTNTEFKDPDTGKTCLLKAMWNLKDG MNDTIPILLEAAEKGGYLKELVDAAYTNDYY  
RGQTALHIAIEKRNMLHVQLLIKSGADLRAMAEGDFFQKKKKGISFYFGELPLSLAACT  
NQLNIVNYLLDKKADLAARDSHGNTVLHALV FVSDNTEENTEIVTKMYDEILKKS VKT  
DPTLKIEEITNWEGLTPLKLA AKTGKIELFKHILRREVTEPEYKHLRSRKFTEW TYGPV  
HTSLYDLSSVDTHEADSVLETIVFKSNASNRHNMVVLEPINTLLEEKWENFAGKIFYIK  
FLLYILYMIIFTVTAYHRPLQGQP PPLEGTAKGNLRVIGEIMMFGAIYILICQIYFWKR  
RPSLQILMMDGYFEILFFLQALILLCSGATYLAGSEVYVALMVFSLVIGWVDMLYYTRG  
FQQTGIYSVMIQKTILRDMTLNGEAPQEAANGTEQSESGSSYGGLYITSLELKFFTIGMG



DLEFNENLKFKHFFMFNMLIALMWKLQRAATILDIERFIPRFIRKCLKIGQWLTVGKS  
PDGNPDKRWCFRVEEMVWGSWEKDLANINEEPGDTEKGLSSSKKTPGKGNLEHKY  
FLTIMFFLNSY-----  
-----  
-----

>TRPV2\_Danio\_rerio

MSKSMDSVSSFSLETDDQTEEERTKAKQMKKVSKDKRPMDSNYVDDVVEPSSTIKF  
NLHFDRGIRNLKEEPAQQDNDRFITIKRLFEAVSSGDVSKMQGLHEYLHKNMKRLTDS  
QYKSNGKTALLKALLNLRQGENDTIEQLLDIAEKMGDLKNFINAAAYTDSYKQGTALH  
VAIERRSMKFVQMLVKKGADVHAKACGKFFQPNQKMCIFYGELPLSLAACTNQDIV  
DFLMENPHQAVDVRERDCHGNTVLHALVSVADNSPENEFVIAMYDHILIKADQLHP  
KTKLEEIENNEGLTPITLAACKGKLGFLFKHIVQRELMGCRHLSRKITEWAYGPVCSLY  
DLSSLDTYEKNSALEIVVYGSEIPNRLEMLQIEPLNRLIEEKWDQFAHRMFLFNFIVYVI  
YLFIFTASAFYHEEGKDYANQTKPPYLYAKSREGYLLTGHIISITGAFYFFIRGLDMVR  
KRPRFQSLIIDGYTDQLFFVQGLLFLASVVLYCYGQYEYLAFLVLCLALSWINLLYFSRG  
SKNLGIYNVMIQKMLVGEIRRFLVVYMVFLIGFSAALVTLDDQESIDSGSTRDFRLESDI  
PSLNPTPDSSNPQSRMTHHQPTTARDGRGRFGLTTDNQYEVCKKPSYKNIYFTTLELF  
KFTIGMGDLEFTDHYKYKEVFYVLLIVYIVMTYILMLNMLIALMNQSVEMMSVESTSI  
WKLQRAITTLDMEWILPKCLQGKLRSGEEKDLGGGQEPDRRWCFVVEEVNWTQWN  
RNMGIINEDPGKCTQDPSPANVQREPSRGVLQTFSSRRRTQRAQTREGHELSPLEA  
SSSV-----  
-----

>TRPV2\_Gallus\_gallus

MDNFTNDQSGPCQRNRLVGLLETDDSIQEDKPTSSTKEERSGQYGGKGEPRPLESPYQ  
KESSDYSPKVMINLNYRPGFVSNQKDPNRFDRDLFSVSRGSPEALDGLLEYLRRTS  
KFLTNSYTDKGTCLMKALLNLKNGRNDTIPVLEIDQKTQNPRLVNVACSDCY  
YRGQTALHIAIEKRSLDLVKVLVEHGADVHARAHGFEFFRKKKEGVCFYFGELPLSLAA  
CTNQFEVVEYLLNPHQKARLQEQDTQGNTVLHALVMIADDTEENTKVFSTVYVEIL  
KAGVKTDPVTKLEEIVNYDGLNPLQLAAKTGKVEIFRHIIQREIKDPVYRHLRKFTEW  
TYGPIHVSLEYDLSSLDSEENSVLEILAYSSDTPNRYKMVVLEPLNKLQKQWETFASK  
RFYFSFISYLSFMIIFTAIAYYQPLRVKPSFPVEFTAGGFLWVSGLIILLGGVYLIFAQSLY  
LRRRRQSLKTMCSDCVEILIFIQAFSLLSAVLYGASSENIVAVMVFSLLLGWVNMPLY  
YTRGFQRIGIYSVMIQKTILRDLLRFLVYIIFLFGFAAALVTLMGDAPSLSQNKVAQM  
ENAGSHAMYGGLLSVCLELFKITIGMGDLDFHEHARFRYFVMLLLLLFVILTYILLNM  
LIALMSETVTDISGYSKSVWKLQRAIAIEIAKAWLWRQGGKRRSGCLMSVGLNKKDE  
RWCFRVEEIKWTSWAKEVGVLKEEPPGNTNDLEINPEETRSRKQVPQKQLRSVSEEQ  
SLLQPELSATEMMPLKGQTRNL-----  
-----

>TRPV2\_Meleagris\_gallopavo

MDNFTNDQSGPCQRNRLVGLLETDDSIQEDKPASSSTKEERSGQYGGKGEPRPLESPYQ  
KESSDYSPKVMINLNYRPGVSNQKDPNRFDRDLFSVSRGSPEALDGLLEYLRRTS  
KFLTNSYTDKGTCLMKALLNLKNGRNDTIPVLEIDQKTQNPRLVNVACSDCY

YRQQTALHIAIEKRSLDIVKVLVENGADVHARAHGEFFRKKNEGVCIFYFGELPLSLAAC  
TNQFEVVEYLLNPHQKARLQEQDTQGNTVLHALVMIADDTEENTKFVSTVYVEILK  
AGVKTDPTVKLEEIVNYDGLNPLQLAAKTGKVEIFKHIIQREIKDPVYRHLRSRKFTWWT  
YGPIHVSLYDLSSLDSEENSVEILAYSSDTPNRYKMVVLEPLNKLLQKQWETFASKR  
FYFSFISYLSFMIIFTAIYYQPLRVKPSFPVEFTAGGFLWVSGLIILLGGVYLIFAQSLYL  
RRRRQSLKTMCSDESCVEILIFIQAFSLLLSAVLYGASSENIVAVMVFSLLLGWVNMPLY  
TRGFQRIGIYSVMIQKTILRDLLRFLLVYIIFLFGFAAALVTLMGDAPSLSQNKSVQAQME  
SAGSHAMYGGLLSVSLELFKITIGMGDLDFHEHARFRYFVMLLLLLFVILTYILLNMLI  
ALMSETVTDISGYSRSVWKLQRAIAILEIEKAWLWRQGGKRRSGCLMSVGLNKKDER  
WCFRVEEIKWTSWAKEVGVLKEEPGNTSDLEINPEASC-----  
-----  
-----

>TRPV2\_Taeniopygia\_guttata\_fragment

LETDDSVQEDKPAPSKKEERSGHGRKPLETPYQKESDFAPKIKVNLNYPGSKDPN  
RFDRDRLFSAVVRGSPEALDGLLEYLRNSKFLTNSEYTGKTCLMKALLNLKNGKND  
TIPVLEIDQKTQNPRLVNVSCSDCFYRGEGLIFRHIIQREIKDYRHLRSRKFTWWTY  
PIHVSLYDLSSLDSEENSVEILAYSSDTPRYKMVVLEPLNKLLQKQWETFASKFYFSF  
VSYLSFMIIFTAIYYQPQAFSLLLSAVLYGASSENIVAVMVFSLLLGWVNTLYYTRGFQ  
RTGIYSVMIQKIMRDLLRFLLVYMIFLFGFAESSGSHAMYGGLLSVSLELFKITIGMGDL  
DFQEHTFRYFVTLLLLLFVILTYILLNMLIALMSETVTDISGYSKSVWKLQRAITILDI  
ENSYLNCRHSFRSGKQVLVGITPDGQDDYRWCFRVDEVNWSTWNTNLGIINEDPGYS  
G-----  
-----  
-----  
-----

>TRPV2\_Melopsittacus\_undulatus\_fragment

MPDPSSAVSYFPYFNGDYLAVAASLNGGNVLATFVDMVAQWTEELGLQIQESAIYTKII  
EAALAQTNSKLSIHPTIFGERHVPEQLASVSNIASVDSLGLGHVTRALCRGIVENLCSMLP  
VQCLMETGVRRLGSGSALARNEVLRQEVERVFPFPVYVYKDVDAAMGAAMFISLNK  
VPAEMEYGCLLIMSSILGKMKKFGSSDMEESEATDEHTDGEDSTLETSDSLQSTLNTK  
VHPPKSNIFARRGRFVMGSDSDKMAPMDSLYQMDHLLAPSVIKFHANLERGKFKHKRI  
FDAVAQGNTRDLDLDDLLYLNRTLKHLTDDEFKGTGKTCLLKAMLNLHDGKNDTIPLL  
LDIAKKTGTLKEFVNAEYTDNYYKQQTALHIAIERRNMYLVKLLVQNGADVHARACG  
EFFRKIKGKPGFYFGRGELPLSLAACTNQLCIVKFLENPYQAANIAAEDSMGNMVLH  
TLMYNNILILGAKINPILKLEELTNKKGLTPLTLAAKTGKIGVAVVTLIEDDNEGQDTNI  
SEYSRCCHVKRGRTSYNSLYTCLFLFKFTIGMGDLEFTENYRFKSVFVILLVLYVILTYI  
LLNMLIALMGETVSKIAQESKSIWKLQVHWFCEAVIQERGVDEVNWSTWNTNLGII  
NEDPGCSGDLKRNPSYSIKPGRVHLYLIYIKYMSRDICLFLWMGNVFAHKLLCILKVLG  
QTALNIAIERRQYEITQSLIEKGADVNAHAQGIFFNPKHKHEGFYFGWGSANPEVAEL  
QKAANGSEEKSPRAKVWNRNEYTPLSNMKDSRPESGIIRKFNLSNSVKTVQQNP  
PNNRILLHNSIKKEKILVSLNPDFLTSKEVQLSTSDGKAEQNISKLALTWELCYVPT  
QGSPQGADSPLTGSTRQQSDDGQQRATEGQGTATCTQHGTCLKEYGGCQQAQKQH  
EGTSVPVLWQPHQDLSFHGKFHETLLALVAGTYCRYRWNS

>TRPV2\_Analis\_carolinensis\_fragment

RLSSASIGVRAEKAFKIYSRRRLFDVAQGDPSDLDLFLYLMETMKNLTDDEFKEP  
DTGKTCLLKAMLNHLNGWNDTIPLLLDIAKKTDLNKEFVNAEYTDGYYKGQTALHIA  
IERNYYLVELLLKNGADVHARAHGEFFQNIKGRPGFYFGELPLSLAACTNQLNIAKYL  
LENPFQPADIAAQDSMGNTVLHALVEIADNTEDNTKFTNVYNEILVLGARINPTLKL  
EIPNRRGLTPLTLAAKAGKIQVFAYILRREMKAPECRHLSRKFTEWAYGPVHSSLYD  
LSSIDTCEKNSVLEIIAYSSETPNRHEMLLVEPLNQLLQDKWDRFVKHLFYFNFFTYTA  
HILILTVAAYFRPTKKDGVPPFPLRHTTSEYFRVAGEILSILGGVYFFFRGLKYFKHRRP  
SLKAVFTDSYSELLLYVHTIYYIISIAQY-----

-----  
-----  
-----  
-----

>TRPV2\_Chrysemys\_picta\_bellii\_fragment

MYDEILKAGTKINPAEKLEEVNQAAGLTPLKLAACKGKVEIFRHILQREIKDPEYRHLS  
RKFTEWTYGPVHVSlyDLSSVDSYEKNSVLEILAESSDTPILRDLLRFLMVYVIFLFGF  
AAALVTLTG DAPPASQNTSVTPEDGDKGHVVYSGLLSTSELEFKFTIGMGDLEFQEHV  
YDQNVLSPLIVYWLGMKIVLFSDFRVEEINWANWEKELGVIKEDPGNSRDLEIESLA  
VTPLSSFNIDTRKKWITPPTAPLSWPKVLQHS DGRKTW-----

-----  
-----  
-----  
-----  
-----

>TRPV3\_Rattus\_norvegicus

MNAHSKEMVPLMGKRRTAPGGNPAVLTEKRPADLTPTKKS AHFFLEIEGFEPNPTVT  
KTSPPIFSKPMDSNIRQCLSGNCDDMDS PQSPQDDVTETPSNPNSPSANLAKEEQRQK  
KKRLKCCIFA AVSEGCVRELRELLQDLQELCRRRRGLDASDFLMHKLTASDTGKTCLM  
KALLNINPNTKEIVRILLAF AEENDILDRFINAEYTEEAYEGQTALNIAIERRQGDITAV  
LIAAGADVNAHAKGVFFNP KYQHEGFYFGETPLALAACTNQPEIVQLLMENEQTDITS  
QDSRGNILHALVTVAEDFKTQND FVKRMYDMILLRSGNWELETMRNNDGLTPLQL  
AAKMGKAEILKYILGREIKEKPLRSLSRKFTDWAYGPVSSSLYDLTNVDTTTTDNSVLEII  
VYNTNIDNRHEMLTLEPLHTLLHMKWKKFAKYMFFLSFCFYFFYNITLTLVSYRPRE  
DEALPHPLAL THKMSWLQLLGRMFVLIWAMCISVKEGIAIFLLRPSDLQSILSDAWFH  
FVFFVQAVLVILSVFLYLFAYKEYLACLVLAMALGWANMLY YTRGFQSMGMYSVMIQ  
KVILHDVLKFLFVYILFLLGFGVALASLIEKCSKDKDCSSYGSFSDAVLELFKLTIGLD  
LNIQQNSTYPILFLLITYVILTFVLLL NMLIALMGETVENVSKESERIWRLQRARTILE  
FEKMLPEWLR SRFRMGELCKVAEDEFRLCLRINEVKWTEWKTHVSFLNEDPGPIRR  
TADSNKIQDSSRSNSKTTLYAFDELDEF PETS-----

-----  
-----

>TRPV3\_Homo\_sapiens

MKAHPKEMVPLMGKRVAAPSGNPAILPEKRPAEITPTKKS AHFFLEIEGFEPNPTVAK  
TSPPVFSKPMDSNIRQCISGNCDDMDS PQSPQDDVTETPSNPNSPSAQLAKEEQRRKK  
RRLKKRIFA AVSEGCVEELVELLVELQELCRRRHDEDVPDFLMHKLTASDTGKTCLMK  
ALLNINPNTKEIVRILLAF AEENDILGRFINAEYTEEAYEGQTALNIAIERRQGDIAALLI  
AAGADVNAHAKGAFFNPKYQHEGFYFGETPLALAACTNQPEIVQLLMEHEQTDITSR  
DSRGNNILHALVTVAEDFKTQND FVKRMYDMILLRSGNWELETTRNNDGLTPLQLA  
AKMGKAEILKYILSREIKEKRLRSLSRKFTDWAYGPVSSSLYDLTNVDTTTTDNSVLEIT  
VYNTNIDNRHEMLTLEPLHTLLHMKWKKFAKHMFFLSFCFYFFYNITLTLVSYRPR  
EEEAIHPHALTHKMGWLQLLGRMFVLIWAMCISVKEGIAIFLLRPSDLQSILSDAWF  
HFVFFIQAVLVILSVFLYLFAYKEYLACLVLAMALGWANMLYYTRGFQSMGMYSVMIQ  
KVILHDV LKFLFVYIVFLLGFGVALASLIEKCPKDNKDCSSYGSFSDAVLELFLKTIGLGD  
LNIQQNSKYPIFLFLITYVILTFVLLL NMLIALMGETVENVSKESEIRIWR LQRARTILE  
FEKMLPEWLR SRFRMGELCKVAEDDFRLCLRINEVKWTEWKTHVSFLNEDPGPVR  
TDFNKIQDSSRNNSKTTLNAFEEVEEFPETSV-----  
-----  
-----

>TRPV3\_Sarcophilus\_harrisii

MSKNPKEMVPLMGKKTGTPSAAPVCPLERRPAEVTPTKKS AHFFLEIEGFEPNPAAN  
KPSPPIFPKPMDSNIRQCNPGHCDDMDS PQSPQDDITETPSNPNSPCVSLAKEEQKR  
NRRLKKRIFA AAAAEGSVEELSVLLTELWELARRRRTMDPMDYLMHKLTASDTGKT  
LMKALLNINPNT EEVVRTLLTFAEENGILEQFINAEYTEEAYRGQTALNIAIERRQVAI  
TKTLIDNGADVNAHAKGLFFNPKHKHEGFYFGETPLALAACTNQPEIVQLLMDNEKT  
DIASQDSQGNILHALVTVAEDCRTQND FVKEMYDMILLRSEDPELETAQNNDGLTP  
LQLAAKTGKSEILKYILSREIKEKPHRSLSRKFTDWAYGPVSSSLYDLTDVDTTTTNSV  
LEIIVYNTNIDNRHEMLTLEPLHTLLRMKWKKFAKYMFFTSFCFYFFYNITLTLVSYR  
PREEEALPHPLALTHKMGWLQLIGRMFVLIWATCISVKEGIAIFLLRPSDLQSILSDAW  
FHFAFFIQAVLVILSVFLYLFAYKAYLACLVLAMALGWANMLYYTRGFQSMGMYSVMI  
QKVILHDV LKFLFVYIVFLLGFGVALASLIEKCPDSKGECSYGSFSDAVLELFLKTIGL  
DLNIQQNSKYPIFLFLITYVILTFVLLL NMLIALMGETVENISKESERIWR LQRARTIL  
EFEKLLPEWLRCKFRMGELCKVAQEDFRLCLRINEVKWTEWKTHVSFISEDPGPGRS  
LDLSKAQDSSRYNSKTTLNAFDELDDVPETSV-----  
-----  
-----

>TRPV3\_Tursiops\_truncatus\_fragment

MDAHPKEMVPLMGRIATMPSGNAAILQEKRLAEITPTKKS AHFFLEIEGFEPSTTVTKT  
SPLIFSKPMDSNIRQCSLPGSCDDMDS PHSPQDDVTETPFNPNSPSANPAKQEQRHKQ  
KRLKKHIFA AVSEGC VQQLLELLMELQELCEQRHSLEVPDFLMRNLTALDTGKTCLM  
KALLNINPSTKEIVRILLAF AEENDILDRFINAKYTEEAFEGQTALNIAIERRQGDIAAVL  
IEAGADVNAHAKGVFFNPKYQHEGFYFGETPLALAACTNQPEIVELLMGNEQTDITSQ  
DSRGNNILHALVTVAEDFKTQND FVKHMYDMILLRSGNWELETMRNNNGLTPLQLA  
AKMGKAEILKYILSREIKEKRLRSLSRKFTDWAYGPVSSSLYDLTNVDTMTDNSVLKII  
VYNTNIDNRHEMLTLEPLHTLLHMKWKKFAKYMFFLSFCSYFFYNITLTIISYYHTRG

EEALKHPLANKMGWLQLLGRMFVLIWAMCISVKEGIAIFLLRPSDMQSILSDAWFHF  
VFFVQALLVILSVLLYLFAKEYLTCLVLAMALGWANMLYYTRGFQSMGMYSVMIQK  
VILHDVLKFLFVYIVFLFGFVALASLIEKCSKDNEDCTSYGSFSDTVLELFKLTIGLGD  
KIQQNSKYPILSLILLITYVTLTFVLLNMLIALMGETVENISKESEIRIWRQRARTILEF  
EKMLPEWLKSRFQMGELCKVAEQDFRLCLRINEVKWTEWKTHVSFLNEDPGPGRRS

-----  
-----  
-----

>TRPV3\_Ornithorhynchus\_anatinus

MNKTQKELIPLMGKKTNPSSASAGLLEKKPSEVTPTKSSHFFLEIEGFEPNPAVSKP  
SPPIFSKPMDSNIRQCISGNCEDMDSPQSPQDDITETPSNPNSPCVNLAREQNRNKKKL  
KKCIFAAVSEGNVEELNSLLVELKELSKRRRNMDIQDYLMHKFTASDTGKTCLMKALL  
NINPNTKEIVRHLLSFAEENGILERFINAEYTEEAYKGQTALNIAIERRQCEITETLIEKG  
ADVNVQAKGLFFNPKYKHEGFYFGETPLALAACTNQPEIVQMLMDNNDKTDIASQDSR  
GNTILHALVTVAEDFKTQNDVFKQMYDRILLRSKNMALETMQNNDGLTPLQLAAKM  
GKSEILKYILSREIKEKPKRSLSRKFTDWAYGPVSSSLYDLTKVDTTTTDNSVLEIIVYNT  
NIDNRHEMLTLEPLHTLLRMKWKKFAKYMFFMSFCLYFFYNITLTLVSYRPREEEA  
LPHPLALTHKMGWLQLLGRMFVMIWATCITVKEGIAIFLLRPSDLQSILSDAWFHF  
FIQAVLVILSVFLYLFAKEYLAQLVLAMALGWANMLYYTRGFQSMGMYSVMIQKVIL  
HDVLKFLFVYIVFLFGFVALASLIEKCPQNDSECSYGSFSDAVLELFKLTIGLGDLD  
IQQNSKYPILFLFLITYVILTFVLLNMLIALMGETVENISKESEIRIWRQRARTILEFE  
KLLPEWLRSKFRGELCKVADNDFRLCLRINEVKWTEWKTHVSFISEDPPGGRHSEG  
FNKIQDVSRSNSKTTLNAFDEIEDFPETSV-----

-----  
-----

>TRPV3\_Bos\_taurus

MKAHPKEMVPLTGRRATIPFVNPAIMQEKRPSEITPTKSAHFFLEIEGFEPNPTVAK  
TSPPIFSKPMDSNIRQCVSGNCDDMDSPQSPQDDVTETPSNPNSPSANLAKEEQRRKK  
KRLKKRIFTAVSEGCVEELLELLGELQELCKRRHSLDVPDFLMHKLTALDTGKTCLMK  
ALLNINPNTKEIVRILLFAEENDILDRFINAEYTEEAYEGQTALNIAIERRQGDITAALI  
AAGADVNAHAKGVFFNPKYQHEGFYFGETPLALAACTNQPEIVQMLMENEQTDITSQ  
DSRGNNILHALVTVAEDFKTQNDVFKRMYDMILLRSRTWELETTRNNDGLTPLQLAA  
KMGAEILKYILSREIKDKRLRSLSRKFTDWAYGPVSSSLYDLTNVDTTTTDNSVLEIIVY  
NTNIDNRHEMLTLEPLHTLLHMKWKKFAKYMFFLSFCFYFFYNITLTLVSYRPREEE  
ALPHPLALTHKMGWLQLLGRMFVLIWAMFISVKEQIAIFLLRPSDLQSILSDAWFHF  
VFFAQAVLVILSVFLYLFAKEYLAQLVLAMALGWANMLYYTRGFQSMGMYSVMIQK  
VILHDVLKFLFVYIVFLFGFVALASLIEKCPKSHENCSSYGSFSDAVLELFKLTIGLGD  
NIQQNSKYPILFLFLITYVILTFVLLNMLIALMGETVENVSKESERIWRQRARTILEF  
EKILPEWLRSRFRMGELCKVAEDDFRLCLRINEVKWTEWKTHVSFLNEDPPGGRRTA  
DSNKIQDSSRSNSKTTLNAFEEIDEFPETSV-----

-----  
-----

>TRPV3\_Canis\_familiaris

MNAHPKEMVPLMGRRAAVPSGNPAILQEKRP AEITPTKKS AHFFLEIEGFDPNPTVSK  
TSPPIFSKPMDSNIRQCLSGNCDDMDSPQSPQDDVTETPSNPNSPSANVAKEEQRRKK  
KRLKKRIFA AVSEGC VGE LLE LLE LVELQELCKRRRGLDVADFLMHKLTASDTGKTCLMK  
ALLNINTKTK EIVRILLAFAEENDILDRFVNAAYTEEAYEGQTALNIAIERRQGDLTALL  
IAAGADVNAHARGVFFNPKYQHEGFYFGETPLALAACTNQPEIVQLLMENEQTDITSQ  
DSRGNNILHALVTVAEDFKTQND FVKRMYDMILLRSGTWELETMHNNDGLTPLQLA  
AKMGKAEILKYILSREIKEKPLRSLSRKFTDWAYGPVSSSLYDLTNVDTTTTDNSVLEIIV  
YNTNIDNRHEMLTLEPLHTLLHMKWKKFAKYMFFLSFCLYFFYNITLTLVSYRPREE  
EALPHPLALTHKMGWLQLLGRMFVLIWAMCISVKEGIAIFLLRPSDLQSILSDAWFHF  
VFFVQAVLVVLSVFLYLFAYKEYLACLVLAMALGWANMLYYTRGFQSMGMYSVMIQK  
VILHDV LKFLFVYIVFLLGFGVALASLIEKCPSDNKDCSSYGSFSDAVLELFKLTIGLGD  
NIQQNSKYPILFLLITYVILTFVLLLNMLIALMGETVENVSKESERIWRLQRARTILEF  
EKMLPEWLR SRFRMGELCKVAEEDFRLCLRINEVKWTEWKTHVSFLNEDPGPGRSW  
TDFNKIQDSSRSNSKTTLNAFDEIDFPETSV-----  
-----  
-----

>TRPV3\_Ailuropoda\_melanoleuca

MNAHPKEMVPLMGRRAAVPSGNPAVLQEKRSAEVTPTKKS AHFFLEIEGFDPNPTVS  
KTSPVFSKPMDSNIRQCLPGNCDDMDSPQSPQDDVTETPSNPNSPSANLAKEEQRR  
RKRRLKKRIFA AVSEGC GEEL LLE LLE LLE LLE LQELCKRRRGLDVADFLMHKLTASDTGKTCL  
MKALLNINPNTKEIVR VLLAFAEDNDILDRFVNAAYTEEAYEGQTALNIAIERRQGDIA  
ALLIAAGADVNAHARGVFFNPKYLHEGFYFGETPLALAACTNQPEIVQLLMENEQTDI  
TSQDSRGNNILHALVTVAEDFKTQND FVKRMYDTILLRSGTWELETMQNNDGLTPLQ  
LAAKMGKAEILKYILGREIKEKPLRSLSRKFTDWAYGPVSSSLYDLTNVDTTTTDNSVLE  
IIVYNTNIDNRHEMLTLEPLHTLLHMKWTRFAKYMFFLSFCFYFFYNITLTLVSYRPR  
EEEALPHPLALTHKMGWLQLLGRMFVLIWATCISVKEGIAIFLLRPSDLQSILSDAWF  
HFVFFVQAVLVILSVFLYLFAYKEYLACLVLAMALGWANMLYYTRGFQSMGMYSVMI  
QKVILHDV LKFLFVYIVFLLGFGVALASLIEKCPSDNKDCSSYGSFSDAVLELFKLTIGL  
DLNIQQNSKYPILFLLITYVILTFVLLLNMLIALMGETVENVSKESERIWRLQRARTI  
LEFEKMLPEWLR SRFRMGELCKVAEEDFRLCLRINEVKWTEWKTHVSFLNEDPGPV  
RRTADFNKIQDSSRSNSKTTLNAFDEIDFPETSV-----  
-----  
-----

>TRPV3\_Loxodonta\_africana

MNAHPKEMVPLMGRKAMAPSGNPAVLQEKRP AELTPTKKS AHFFLEIEGFEPNPTIS  
KTSPPIFSKPMDSNIRQCISGNCEDMDSPQSPQDDVTETPSNPNSPSANLAKGEQRRK  
KKRLKKRIFA AVSEGC VDEL VELLVELREL CRRRSDLDVPGQLLMHKLTSDTGKTS LM  
KALLNINPTKEIVRTLLFAEENDILDRFINAEYTEEAYEGQTALNIAIERRQGDIAAVLIA  
AGADVNAHAKGVFFNPKYQHEGFYFGETPLALAACTNQPEIVELLMENEQTDIASQDS  
RGNNILHALVTVAEDFKTQND FVKRMYDMILLRSRNWELETTRNNEGLTPLQLAAK  
MGKAEVLNYILSREIKEKPLRSLSRKFTDWAYGPVSSSLYDLTNVDTMTDNSVLEIIVY  
NTNIDNRPEMLTLEPLHTLLHMKWKKFAKYMFFLSFCFYFFYNITLTLVSYRPREEE  
ALPHPLALTHKMGWLQLLGRMFVLIWAMCISVKEGIAIFLLRPSDLQSILSDAWFHFV  
FFIQAVLVILSVFLYLFAYKEYLACLVLAMALGWANMLYYTRGFQSMGMYSVMIQKVI  
LHDV LKFLFVYILFLLGFGVALASLIEKSKDNSNCSSYGSFGDAVLELFKLTIGLGD LNI

QQNSKYPILFLFLITYVILTFVLLLNLIALMGETVENVSKESERIWRLQRARTILEFE  
KMLPEWLRSRFRMGELCKVAENDFRLCLRINEVKWTEWKTHVSFLNEDPGPVKRTA  
DLNKIQNLSRSNSKTTLNAFDEIDFETS-----  
-----

>TRPV3\_Sus\_scrofa

MNAHPKEMVPLVVGKRAVPSGNPAILQEKRPAEITPTKKS AHFFLEIEGFEPNPTVAKT  
SPPIFSKPMDSNIRQCISGNCDDMDSPQSPQDDVTETPSNPNSPSSAHLAKEEQRRKK  
KRLKKRIFA AVSEGCVEELVELLMELQELGKRRRGLDVSDFLMHKLTASDTGKTCLM  
KALLNINPNTKEVVRILLAF AEENDILDRFINAEYTEEAYRGQTALNIAIERRQGDITAL  
LIHAGADVNAHAKGVFFNPKYQHEGFYFGETPLALAACTNQPEIVQLLMEHEQTDITS  
QDSRGNILHALVTVAEDFKTQNDFVKRMYDMILLRSGTWGLETTRNKDGLTPLQLA  
AKMGKAEILKYILSREIKDKRLRSLSRKFTDWAYGPVSSSLYDLTNVDTTTENS VLEIIV  
YNTNIDNRHEMLTLEPLHTLLHMKWKKFAKYMFFLSFCFYFFYNITLTLVSYRPREV  
EALPHPLALTHKMGWLQLLGRMFVLIWAMCISVKEGIAIFLLRPSDLQSILSDAWFHF  
VFFVQAVLVILSVFLYLFAYKEYLACLVLAMALGWANMLYYTRGFQSMGMYSVMIQK  
VILHDVLKFLFVYIVFLLGFGVALASLIEKCSKDNKDCSYGSFSDAVLELFKLTIGLGD  
LNIQQNSKYPILFLFLITYVILTFVLLLNLIALMGETVEDVSKESERIWRLQRARTILEF  
EKMLPEWLRSRFRMGELCKVAEEDFRLCLRINEVKWTEWKTHVSFLNEDPGPGRRT  
ADFNKIQDSSRSNSKTTLNAFDEMEEFETS-----  
-----

>TRPV3\_Myotis\_lucifugus

MNAHPKEMVPLMGRKATVTSGNQVVLQEKRPAEITPTKKS KYLLSKCAAEEPRQ SIS  
DYPSAPLLQNPRDRKVRANVSADTAPTPLMPISGLVEPSSLSANLAKEEQRRKKKRLK  
KCLFAAVSEGCVEDLVQLLVELQELCKRRRNLDVPDFLMHKLTASDTGKTCLMKALL  
NINPNTKEIVRILLAFANENDILDRFINAEYTEEAYEGQTALNIAIERRQRDITALLIAAG  
ADVNAHAKGVFFNPKYQHEGFYFGETPLALAACTNQPEIVQLLMENQQT DITSQDSR  
GNNILHALVTVAEDFKTQNDFVKRMYDMILLRSGNWELETMRNNDGLTPLQLA AKM  
GKAEILKYILSREIKEKRLRSLSRKFTDWAYGPVSSSLYDLTNVDTTT DNSVLEIIVYNT  
NIDNRHEMLTLEPLHTLLRIKWKKFAKYMFFLSFFFYFFYNITLTLISYYRPREEEALP  
HPLALTHKMGWLQLLGRMFVLIWAMCISVKEGIAIFLLRPSDLQSILSDAWFHFVFFV  
QAVLVILSVFLYLFAYKEYLACLVLAMALGWANMLYYTRGFQSMGMYSVMIQKVILH  
DVLKFLFVYIVFLLGFGGALASLIEKCPKDHKDCSSYGSFSDAVLELFKLTIGLGD LNIQQ  
NSKYPILFLFLITYVILTFVLLLNLIALMGETVENVSKESERIWRLQRARTILEFEKM  
LPEWLRSRFRMGELCKVAEEDFRLCLRINEVKWTEWKTHVSFLNEDPGSVRRTADFN  
KIQDSSRSNSKTTLNAFEEIDFETS-----  
-----

>TRPV3\_Gorilla\_gorilla

MKAHPKEMVPLMGKRVAAPSGNPAVLPEKRPAEITPTKKS AHFFLEIEGFEPNPTVA  
KTSPVFSKPMDSNIRQWHCDRHGRCWRQVQRVPGSSGGEKERLSLRGCFSAQLAKE  
EQRRKKRRLKKRIFA AVSEGCVEELVELLVELQELCRRRHDEDVPDFLMHKLTASDTG

KTCLMKALLNISPNTKEIVRILLAF AEENDILGRFINAEYTEEAYEGQTALNIAIERRQG  
DIAAVLIAAGADVNAHAKGAFFNPKYQHEGFYFGETPLALAACTNQPEIVQLLMEHEQ  
TDITSQDSRGNNILHALVTVAEDFKTQNDVFKRMYDMILLRSGNWELETTRNNDGLT  
PLQLAAKMGKAEILKYILSREIREKRLRSLSRKFTDWAYGPVSSSLYDLTNVDTTTTDNS  
VLEITVYNTNIDNRHEMLTLEPLHTLLHMKWKKFAKHMFFLSFCFYFFYNITLTLVSY  
YRPREEEAVPHPLALTHKMGWLQLLGRMFVLIWAMCISVKEGIAIFLLRPSDLQSILSD  
AWFHFVFFVQAVLVILSVFLYLFAYKEYLACLVLAMALGWANMLYYTRGFQSMGMYS  
VMIQKVLHDVLKFLFVYIVFLLGFGVALASLIEKCPKDNKDCSSYGSFSDAVLELFKLT  
IGLGLDLNIQQNSKYPILFLFLITYVILTFVLLLNMLIALMGETVENVSKESERIWRLQRA  
RTILEFEKMLPEWLRSRFRMGELCKVAEDDFRLCLRINEVKWTEWKTHVSFLNEDPG  
PVRRTADFNKIQDSSRNSKTTLNAFEEIEEFPETSV-----  
-----  
-----

>TRPV3\_Dipodomys\_ordii\_fragment

MNTHPKEMVPLISRRTAPCGNSVVLSEKRPAELTPTKKSAHFFLEIEGFEPNPTVTK  
TSPPIFSKPMDSNIRQCLSGNCDDMDSPQSPQDDVTETPSNPNSPSANLAKEEQRRKK  
KRLKKCIFTAVSEGCVEELVELLLELQELCKRRRGRDVPDFLMHKLTASDTGKTCLMK  
ALLNINPNTKEIVRILLAF AEENDILDRFINAEYTEEAYEGQTALNIAIERRQRDIAAELI  
AAGADVNAHAKGAFFNPRHQHDGFYIRETPLALAACTNQPEIVQLLMENEQTDITSQ  
DSRGNNILHALVTVAEDFKTQNDVFKRMYDMILLRSGNWELETMCNHDGLTPLQLA  
AKMGKAEILKYILSREIKEKPLRSLSRKFTDWAYGPVSSSLYDLTNVDTTADNSVLEIIV  
YNTNIDNRHEMLTLEPLHTLLHMKWKKFAKYMFFLSFCFYFFYNITLTLVSYRPREE  
EALPHPLALTHKMGWLQLLGRMFVLIWATCISVKEGIAIFLLRPSDLQSILSDAWFHF  
VFFVQAVLVILSVFLYLFAYKEYLACLVLAMALGWANMLYYTRGFQSMGMYSVMIQK  
LASLIEKCSKDKTDCSSYGSFSDAVLELFKLTIGLGLDLNIQQNSTYPILFLFLITYVILTF  
VLLLNMLIALMGETVENVSKESERIWRLQARARTILEFEKMLPEWLRSRFRMGELCKV  
AEEDFRLCLRINEVKWTEWKTHVSFLNEDPGPIRRTVDFNKIQDSSRSNSKTTLNAFE  
EIDEFPETSV-----  
-----  
-----

>TRPV3\_Otolemur\_garnettii

MNAHPREMVPLIGRRVAAPSGNPAVLPEKRPVEVTPTTKKSAHFFLEIEGFEPNPTVTK  
TSPPIFSKPMDSNIRQCLSGNCDDMDSPQSPQDDMTETPSNPNSPSLSANLAKEEQRR  
KKRLLKRIFSAVSEGCVEELLELLGELQELCKRRRGLDVPDFLMHKLTASDTGKTCL  
MKALLNINPSTKEIVRILLAF AEENDILDRFINAEYTEEAYEGQTALNIAIERRQGDITA  
VLIAAGADVNAHAKGVFFNPKYQHEGFYFGETPLALAACTNQPEIVQLLMEYEQTNIA  
SQDSRGNNILHALVTVAEDFKTQNDVFKRMYDMILLRSGNWELETVRNNDGLTPLQL  
AAKMGKAEILKYILSREIKEKPLRSLSRKFTDWAYGPVSSSLYDLTNVDTTTTDNSVLEII  
VYNTNIDNRHEMLTLEPLHTLLHMKWKKFAKYMFFLSFCFYFFYNITLTLVSYRPREE  
EALPHPLALTHKMGWLQLLGRMFVLIWAMCISVKEGIAIFLLRPSDLQSILSDAWFH  
FVFFIQAVLVILSVFLYLFAYKEYLACLVLAMALGWANMLYYTRGFQSMGMYSVMIQK  
VILHDVLKFLFVYIVFLLGFGVALASLIEKCPNDNKDCSSYGSFSEAVLELFKLTIGLGLD  
NIQQNSKYPVFLFLITYVILTFVLLLNMLIALMGETVENVSKESERIWRLQARARTILE  
FEKMLPEWLRSRFRMGELCKVAEEDFRLCLRINEVKWTEWKTHVSFLNEDPGPVR  
TADFNRIQDSSRSNSKTTLNAFDEIDEFPETSV-----  
-----  
-----



-----  
-----  
>TRPV3\_Oryctolagus\_cuniculus

MNVLPKDMVPLMGRRATIAGGNPAVLLEKRPAEVTPTKKS AHFFLEIEGFESNPTVT  
KTSPPIFSKPMDSNIRPCVSGNCDDMDSPQSPQDDVTETPSNPNSPSANLAKEEKRRR  
KHRLKKRIFTAVSEGCVQELVGLLLELQELCRRHRGLDVSDFLMHKLTASDTGKTCLM  
KALLNINPRTKEIVRILLTFAEENGILDRFINAEYTEEAYEGQTALNIAIERRQRDIAALL  
IAAGADVNAHAKGVFFNPKYQHEGFYFGGCDGDRVSCPLALRLVPLWESKTRDAPGR  
KRNGNDLWNSLGQIPSVLKGEGDGPCGLREXILLRSGSWQLETMNHDGLTPLQLAAK  
MGKAEILKYILGREIKEKPLRGLSRKFTDWAYGPVSSSLYDLTNVDTTTTDNSVLEIIVY  
NTNIDNRHEMLTLEPLHTLLHMKWKKFAKYMFFLSFCFYFFYNITLTLVSYRPREEE  
ALPHPLALTHNMGWLQLLGRMFVLIWATCISVKEGIAIFLLRPSDLQSILSDAWFHFV  
FFVQAVLVILSVFLYLFAYKEYLACLVLAMALGWANMLYYTRGFQSMGMYSVMIQKVI  
LHDVVKFLFVYIVFLLGFGVALASLIEEVLRRATRSGSSYGSFGTAVLSSQAQQSGLGDL  
NIQAEPSTPSCFCSWLINVISLRLPTSNAHRLMGENVENVSKETKRICCWKLGRART  
ILEFEKMLPEWLRSRFRMGELCKVAEEDFRLCLRINEVKWTEWKTHVSFLKEDPGPI  
KRTADLNKIQDSSRSNSKTTLNAFEEMEEFPETSV-----  
-----

>TRPV3\_Macaca\_fascicularis

MNAHPKETVPLMGKRVAAPSGNPAVLPEKRAAEITPTKKS AHFFLEIEGFEPNPVAAK  
TSPPVFSKPMDSNIRQCISGNCDDMDSPQSPQDDVTETPSNPNSPGAHLAKEEQRRKK  
RRLKKRIFA AVSEGCVEELVELLVELQELCRRRHDEDVPDFLMHKLTASDTGKTCLMK  
ALLNINPNTKEIVRVLLFAEENDILGRFINAEYTEEAYEGQTALNIAVERRQGDIAAAL  
IAAGADVNAHAKGAFFNPKYQHEGFYFGETPLALAACTNQPEIVQLLMDHEQTDITSQ  
DSRGNNILHALVTVAEDFKTQNDVFVKRMYDMILLRSGNWELETTRNNDGLTPLQLA  
AKMGKAEILKYILSREIKEKRLRSLSRKFTDWAYGPVSSSLYDLTNVDTTTTDNSVLEIT  
VYNTNIDNRHEMLTLEPLHTLLRMKWKKFAKYMFFLSFCFYFFYNITLTLVSYRPRE  
EEALPHPLALTHKMGWLQLLGRMFVLIWATCISVKEGIAIFLLRPSDLQSILSDAWFHF  
VFFIQAVLVILSVFLYLFAYKEYLACLVLAMALGWANMLYYTRGFQSMGMYSVMIQKV  
ILHDVVKFLFVYIVFLLGFGVALASLIEKCPKDNKDCSSYGSFSDAVLELFKLTIGLGD LN  
IQQNSKYPILFLFLITYVILTFVLLLNM LIALMGETVENVSKESERIWRLQRARTILEFE  
KMLPEWLRSRFRMGELCRVAEEDFRLCLRINEVKWTEWKTHVSFLNEDPGPVRRTA  
DFNKIQDFSRNNSKTTLNAFEIEIDFPETSV-----  
-----

>TRPV3\_Cavia\_porcellus

MNAHPKEMVPLMGRKANVSCGNPAVLTEKRPAEVTPTKKS AHFFLEIEGFEPNPVT  
KTSPPVFSKPMDSNIRQCLSGNCDDMDSPQSPQDDVTETPSNPNSPRHVIARRQEQES  
DRESRARRIFSAVSEGLELCRRRRGLDVSDFLMHKLTASDTGKTCLMKALLNINPNTK  
EIVHILLTFADENDILDQFVNAEYTEEAYEGQTALNIAIERRQRDIAAVLIAAGADVNA  
HAKGVFFNPKYQHEGFYFGETPLALAACTNQPEIVQLLMENEQTDITSQDSRGNNILH  
ALVTVAEDFKTQNDVFVKRMYDMILLKSGNWELETMHNNDGLTPLQLAAKMGKAEIL

KYILSREIKEKPLRSLSRKFTDWAYGPVSSSLYDLTNVDTTTDNSVLEIIVYNTNIDNRH  
EMLTLEPLHTLLRMKWKKFAKYMFFLSFFFYFFYNITLTLVSYRPREKEDLPHPLAL  
SHKMGWLQLLGRMFVLIWATCISVKEGIAIFLLRPSDLQSILSDAWFHVFFIQAVLVIL  
SVFLYLFAFKEYLAFLVLAMALGWANMLYYTRGFQSMGMYSVMIQKVILHDVLKFLF  
VYIVFLLGFGVALASLIEKCSGDKDCSSYGSFSDAVLELFKLTIGLGDLEKIQQNSTYPIL  
FLFLLNMLIALMGETVENVSKESEIRIWRQLRARTILEFEKMLPEWLRSRFRMGELCK  
VAEDDFRLCLRINEVKWTEWKTHVSFLNEDPGPIRRTVDFNKIQDSSRSNSKTTLNAF  
EEIDFEPETSV-----  
-----  
-----

>TRPV3\_Spermophilus\_tridecemlineatus

MHAHPKEMVPLVGRRTTGPSGNPVVLEKRP AEVTPTKKSAHFFLEIEGFEPNPTVA  
KTSPPIFSKPMDSNIRQCISGNCDDMDSPQSPQDDVTETPSNPNSPSANLAKEEQRRK  
KKRLKKRIFA AVSEGCV EELVELLAELQELCKRRRGMDVPDFLMHKLTASDTGKTCL  
MKALLNINPNTKEIVRILLAF AEENDILDRFINAEYTEEAYEGQTALNIAIERRQGDITA  
VLIAAGADVNAHAKGVFFNP KYQHEGFYFGETPLALAACTNQPEIVQLLMENEQTDIT  
SQDSRGNNILHALVTVAEDFKTQND FVKRMYDMILLRSGTWELETTRNNDGLTPLQL  
AAKMGKAEILKYILSREIKEKPLRSLSRKFTDWAYGPVSSSLYDLTNVDTTTDNSVLEI  
TVYNTNIDNRHEMLTLEPLHTLLHMKWKKFAKYMFFLSFCFYFFYNITLTLVSYRPR  
EVEALPHPLALTHKMGWLQLLGRMFVLIWATCISVKEGIAIFLLRPSDLQSILSDAWF  
HFVFFIQAVLVILSVFLYLFAFKEYLAFLVLAMALGWANMLYYTRGFQSMGMYSVMI  
QKVILHDVLKFLFVYIVFLLGFGVALASLIEKCSGDKDCSSYGSFSDAVLELFKLTIGLGD  
DLNIQQNSTYPILFLFLLITYVILTFVLLNMLIALMGETVENVSKESEIRIWRQLRARTI  
LEFEKMLPEWLRSRFRMGELCKVAEGDFRLCLRINEVKWTEWKTHVSFLNEDPGPIK  
RTADINKMQDSSRNNSKTTLNAFDEMDEFETSV-----  
-----  
-----

>TRPV3\_Equus\_caballus

MNAHPKEMMPLMGRRATIPGAHPAILQEKRP AELTPTKSAHFFLEIEGFEPNPTVT  
KTSPPVFSKPMDSNIRQCISGNCDDMDSPQSPQDDVTETPSNPNSPSANLAKEERRR  
KKRRLKKRIFGAVSEGCV EELLELLAELEICKRRRSVDVPDFLMHKLTASDTGKTCL  
MKALLNINPNTKEIVRILLAF AEENDILDRFINAAYTEEAYEGQTALNIAIERRQGDITA  
ALIAAGADVNAHAKGVFFNP KYQHEGFYFGETPLALAACTNQPEIVQLLMENEQTDIT  
SQDSQGNNILHALVTVAEDFKTQND FVKRMYDMILLRSGNWELETTRNKDGLTPPQL  
AAKLGKAEILKYILSREIREKPLRSLSRKFTDWAYGPVSSSLYDLTNVDTTTDNSVLEI  
VYNTTIDNRHEMLTLEPLHTLLHMKWKKFAKYMFFLSFCFYFFYNITLTLVSYRPRE  
EEALPHPLALTHKMGWLQLLGRMFVLIWAMCISVKEGIAIFLLRPSDLQSILSDAWFH  
FVFFVQAVLVILSVFLYLFAFKEYLAFLVLAMALGWANMLYYTRGFQSMGMYSVMIQ  
KVILHDVLKFLFVYIVFLLGFGVALASLIEKCSGDKDCSSYGSFSDAVLELFKLTIGLGD  
LNIQQNSKYPILFLFLLITYVILTFVLLNMLIALMGETVENISKESERIRIWRQLRARTILE  
FEKMLPEWLRSRFRMGELCKVAEEDFRLCLRINEVKWTEWKTHVSFLNEDPGPGRR  
TDFNKIQDSSRSNSKTTLNAFDEIEEFETSV-----  
-----  
-----

>TRPV3\_Mus\_musculus

MNAHSKEMAPLMGKRRTTAPGGNPVVLTEKRPADLTPTKKS AHFFLEIEGFEPNPTVT  
KTSPPIFSKPMDSNIRQCLSGNCDDMDS PQSPQDDVTETPSNPNSPSANLAKEEQRQK  
KKRLKKRIFA AVSEGCV EELRELLQDLQDL CRRRRGLDVPDFLMHKLTASDTGKTCL  
MKALLNINPNTKEIVRILLAF AEENDILDRFINAEYTEEAYEGQTALNIAIERRQGDITA  
VLIAAGADVNAHAKGVFFNPKYQHEGFYFGETPLALAACTNQPEIVQLLMENEQTDIT  
SQDSRGNNILHALVTVAEDFKTQND FVKRMYDMILLRSGNWELETMRNNDGLTPLQ  
LAAKMGKAEILKYILSREIKEKPLRSLSRKFTDWAYGPVSSSLYDLTNVDTTT DNSVLE  
IIVYNTNIDNRHEMLTLEPLHTLLHTKWK KFAKYMFFLSFCFYFFYNITLTLVSYRPR  
EDEDLPHPLALTHKMSWLQLLGRMFVLIWATCISVKEGIAIFLLRPSDLQSILSDAWF  
HFVFFVQAVLVILSVFLYL FAYKEYLACLVLAMALGWANMLYYTRGFQSMGMYSVMI  
QKVILHDVLKFLFVYILFLLGFGVALASLIEKCSKDKKDCSSYGSFSDAVLELFKLTIGLG  
DLNIQQNSTYPILFLLITYVILTFVLLL NMLIALMGETVENVSKESERIWRLQRARTI  
LEFEKMLPEWLRSRFRMGELCKVAEDEFRLCLRINEVKWTEWKTHVSFLNEDPGPIR  
RTADLNKIQDSSRSNSKTTLYAFDELDEF PETS-----  
-----  
-----

>TRPV3\_Gallus\_gallus

MIKDNKEVVPLMGKKTNPPGAPPSNQEQKPT ESTPTKKS SHFFLEIEGFESNATPNN  
TSPPVFSKPMDSNIRPCASANGEDMDS PQSLQDDVTEYSPNVDSCGANIAQGPEQTGA  
RKKLKKYIFRAVSEGNVEELQGLLAELKERSNVCTNMTVPDYL MKKFTASDTGKTCL  
MKALLNINNNTNQIVNMLLSFAEENGILERFINAA YTEEAYRGQTALNIAIERRQFEIT  
QTLIEKGADVNAHAQGIFFNPKHKHEGFYFGETALALAACTNQPDIIELLM DNTRTNI  
AAQDSRGNNILHALVTVAEDFKTQND FVIRMYDMILLKSKDRNLEKVKNKEGLTPLQ  
LAAKTGKLEVLKYILSREIRDKPNRSLSRKFTDWAYGPVQSSLYDLTELDTTADNSVLE  
IIVYNTNIGNRHEMLTLEPLNSLLRMKWKRFARHMLFMSCCFYFLYNVTLTLVSYHRP  
NENEAPPYPLALTRGVGWLQLSGQVMVMLGAI FLAIKESVAIFLLRPSDLQSILSDAWF  
HFAFFIQAMLVIFSVFLYLSSYKEHLVCLVLAMALGWANMLYFTRGFQSMGIYSVMIQ  
KVILNDVIKFLVYIVFLLGFGVALAAL IETCQNGGECLSNSSLGPVLMDFKLTGLGD  
LEIQNSKYPVFLLLLITYVVLT FVLLL NMLIALMGETVEDISKESEHIWKLQRARTIL  
EFEKFLPKSLRKKFQLGERCKVAENDTRVCLRINEVRWTEWKTHVSFINEDPGPTVH  
FLADPSKVQDNSRTNSKNTLNTFEETDDL PETS-----  
-----  
-----

>TRPV3\_Xenopus\_tropicalis

MINKHPGEMSPLISRERLAPGTPPRSPRHTENGLKRNDTTDFSRSNPLWLSTQMDTN  
NYSNEKKNEDTDTPQTTQTAFSPCYGWQGRKPALTRNTRKPTKLLFKAVSEG DTE  
MLTDLLSEAKSSSRVYSVTQAKEFFMHKLT SKDTGKTCLMKALLNINEKTPEVVRSL  
TFAEENDILETFINA EYTEENYKGQTALNIAIERRQVELVKYLIEKGAKIDVRAQGRFFN  
PKNKYEGFYFGETPLALAACTNQPEIVQLIMDKSPTIGTIQDSLGN TVLHALVNVADNS  
EAQNDFIIGMYDTILRNCKNKSLEQIPNNEGLTSMQLAAKLGKTEILHYILSREIKEKEN  
MVLRSKFTDWAYGPVSSSLYDLTSIDTCWPNSVLEIVVYNTDIDNRHELLTLEPLHTL  
LQMKWKKFARYMFFLSFLLSFTYNIALTLVSYRPRGEQDVYPLNLSYENGWLQLVG  
QMFIIVCATYLMVKEAVVMFLVKQSDLKSVLSDAWFHILFFIQAVLVIVSVFCYLFVGD

FYLVFLVLAMALGWMNLLYYTRGFQSLGIYSVMIQKVILNDVLKFLFVYILFLLGFGVA  
LASLLENCEDGEECQSLSTAILELFELTIGLRGLEMDKDPKYPVFLFLLITFVILTFVLL  
LNMLIALMGETVEKISQESEHIWRLQRARTILEFEKSLPAWLQARFQLGESCTVSKGD  
NNRICLRINEVKWTEWNNHVTCIKEEPGLTFFPDTKDTNTASEDELDSFEKFAGISISV  
GDLEDQAMETTV-----  
-----  
-----

>TRPV3\_Anolis\_carolinensis\_fragment

PYPLAMTDNLGWLQLTGQVVVMLGAIFIAIKESVAIFLLRPSDLQSILSDAWFHFAFFI  
QAVLVIFSVCYLLSYKEHLVCLVLAMSSGWANMLYFTRGLQSMGIYSVMIQQVILNDV  
IKFMAVYIVFLLGFGVALAALIETCPEDSKCSNYSTLGSVEVELFRLTLGLGDLINENA  
KYPILFLLLLISYVVLTFVLLLNLMLIALMGETVEDISKESEHIWRLQRARTIVETEKLLP  
KFLRKKFQLGEWCKVADNDTRLCLRINEVKWTEWKTHVSFINEDPGPTVKIRFLSDY  
NRVQESSRSNSKTTLNAYEEVYDLPETSV-----  
-----  
-----  
-----  
-----

>TRPV3\_Meleagris\_gallopavo\_fragment

SSHFFLEIEGFEGNATPNNTSPPVFSKPMDSNIRPCASANGEDMDSQPQLQDDVTEYS  
PNVDSCCANIAQGPEQTRAPKKLKKYLFRAVSEGNIEELQGLLAELKERSNVCNRNTTV  
PDYLMKKFTASDTGKTCLMKALLNINNTNEIVNILLSFAEENGILERFINAAYTEEAY  
KGQTALNIAIERRQFEITQTLIEKGADVNAHAQGIFFNPKYKHEGFYFGETALALAACT  
NQPDHIELLMDNTRTNIASQDSRGNILHALVTVAEDFKTQNDFVIRMYDMILLKSKD  
RNLEKVKNKEGLTPLQLAAKTGKLEVLKYILSREIRDKPNRSLSRKFTDWAYGPVQSS  
LYDLTELDTTADNSVLEIIVYNTNIGNRHEMLTLEPLNSLLRMKWKRFAHMLFMSC  
CFYFLYNVTLTLVSYHRPNENEAPPYPLALTRGVGWLQLSGQVMVMLGAIFLAIKESV  
AIFLLRPSDLQSILSDAWFHFAFFIQAMLVIFSVCYLLSYKEHLVCLVLAMALWANML  
YFTRGFQSMGIYSVMIQKVILNDVIKFLVVYIVFLLGFGVALAALIETCQNGGECHSNSS  
LGPVLMDFKLTGLGDLQNSKYPVFLLLLITYVVLTFVLLLNLMLIALMGETVEDI  
SKESEHIWKLQRARTILEFEKFLPKSLRKKFQLGERCKVAENDTRVCLRINEVRWTEW  
KTHVSFINEDPGPTVHFLADPSKVQDNSRTNSKNTLNTFEEMDDLPELPSL-----  
-----  
-----

>TRPV3\_Pelodiscus\_sinensis\_fragment

KDKKENIPLMGKRTNTLGPPTNNQEKKPAESTPTKSSQFFLEIEGFESNSSLRQTSP  
PVFSKPMDSNIRPCASRNGEDMDSQPQLQDDITEYATNVDSYCTHMLQGDHQNAPK  
KLKKYMFRAVSEGNTEELQHLLMEVKERSNRCRNMVQDYLMKKLTDSDTGKTCLM  
KALLNINQNTNEIVKMLLSFGEEENSFLERLINAKYTEEAYKGQTALNIAIERRQYVIAH  
TLIEKGADVNAHAQGVFFNPKRKHDFYFGETPLALAACTNQPDIVQLLMDNRRTDI  
TSQDSRGNILHALVTVAEDFKTQNDFVIRMYDMILLKSKNRTLETMKNKDGLTPLQ

LAASKGKLEILKYILSREIRDKPNRSLSRKFTDWAYGPVQSSLYDLTELDTTADNSLLEI  
IVYNTNIGNRHEMLALEPLHSLLRMKWKKFARHMFFMSFCFYFIYNILLTLVSYYRPW  
RGEAPPYPLALTHNLGWLQLLGQVLIIEAIFLAIKESVAIFLLRPSDLQSILSDAWFHFA  
FFIQAVLVIFSVFLYLFSYKEHLMCLVLAMALGWVNMLYFTRGFQSMGIYSVMIQKVL  
HDVLKFLVVYIVFLLGFSVALAALIEECPNDNKCHSYSSLGTVLMELFKLTIGLDLEM  
QQKSKYPVLFLLLLITYVLLAFVLLLNMLIALMGETVENISKESEHIWRLQRAKTILEFE  
KILPKYLKKKFLLGEMCKVAENDTRVCLRINEVKWTEWKTHVSVFINEDPGPTGYQAE  
TGYNRIQDTSRSNSKNTLNTFDEMDYLIETTV-----  
-----  
-----

>TRPV3\_Procavia\_capensis\_fragment

MNAHSKEMVPLMGRKASVPSGNAVLQEKKPAELTPTKKS AHFFLEIEGFEPNPTVP  
KTSPPIFSKPMDSNIRQCTSDNCDDMDS PQSPQDDVTETPSNPNSPXXXXXXXXXXXXX  
XXXXXXXXSRIFAAVSEGCVEELVELLRELQELCRRRGLDMPDFLIHKL TASDTGKTCLM  
KALLNINPNTKEIVRILLTFAEENNILDRFINAEYTEEAYEGQTALNIAIERRQGDVTAE  
LIAAGANVNAHAKGVFFNPKYQHEGFYFGETPLALAACTNQPEIVQLLMENEQTDITS  
QDSRGNNILHALVTVAEDFKTQNDFVKHMYDMILLKSR SWELETMRNNDSLTPLQL  
AAKMGKAEILKYILSREIKEKPLRSLSRKFTDWAYGPVSSSLYDLTDVDTTENS VLEII  
VYNTNIDNRHEMLTLEPLHTLLHMKWKKFAKYMFFLSFCFYFFYNITLTLVSYYRPRE  
EALPHPLALTHQMGWLQLLGRMFVLIWAMCISVKE-----  
-----  
-----  
-----  
-----

>TRPV3\_Taeniopygia\_guttata

MIKDNNEIVPLMGKKTNLPGNPPANQEQKVTETGPTTKKSSHFFLEIDGFESNASPNN  
TSPPVFSKPMDSNIRPCASANGEDMDS PQSLQDDATEYSPNVDS CGATTTCQDPEL RSA  
RKKLKRNLFRVSEGNAAELQRLLAELRERSGACTSLPMPDYLMKKFTASDTGKTCL  
MKALLNINQNTNEIVNMLLSFAEENGILERFINAAYTEEAYKGQTALNIAIERRQYEIT  
QSLIEKGADVNAHAQGIFFNPKHKHEGFYFGETALALAACTNQPDIIELMDNARTNIS  
SQDSRGNNILHALVTVAEDSKTQNDFVIRMYDMILLKSKDRTLETTKNKEGLTPLQLA  
AKTGKLEILKYILSREIREKPNRSLSRKFTDWAYGPVQSSLYDLTELDTTADNSVLEIIV  
YNTNIGNRHEMLTLEPLNSLLRMKWKKFARHMFFMSCCFYFLYNVTLTLVSYHRPN  
TNEAPPYPLALTRGVGWLQLSGQVMVMLGAIFLAIKESVAIFLLRPSDLQSILSDAWFH  
FAFFIQALLVIFSVFLYLFSYKEHLVCLVLAMALGWANMLYFTRGFQSMGIYSVMIQKA  
TVILQDVIKFLVVYIVFLLGFGVALAALIETCQEGGECHSNSSLGPVLMDFLKLTLGLD  
LEIQNSKYPVLFLLLLITFVVLTFVLLLNMLIALMGETVEDISKESEHIWKLQ RARTIL  
EFEKFLPKCLRKKFQLGERCKVAENDTRVCLRINEVKWTEWKTHVSVFINEDPGPTER  
VDPSKIQDNSRTNSKNTLNTFEETDDL PETS V-----  
-----  
-----

>TRPV4\_Rattus\_norvegicus

MADPGDGPRAAPGDVAEPPGDESGTSGGEAFPLSSLANLFEGEEGSSSLSPVDASRPA  
PGDGRPNLRMKFQGAFRKGVNPNIDLLESTLYESSVVPKPKAPMDSLFDYGTYRH  
HPSDNKRWRKVVVEKQPQSPKAPAPQPPILKVFNRPIFDIVSRGSTADLDGLLSYLL  
THKKRLTDEEFREPSTGKTCLPKALLNLSNGRNDTIPVLLDIAERTGNMREFINSPFRD  
IYYRGQTALHIAIERRCKHYVELLVAQGADVHAQARGRFFQPKDEGGYFYFGELPLSLA  
ACTNQPHIVNYLTENPHKKADMRRQDSRGNTVLHALVAIADNTRENTKFVTKMYDL  
LLLKCSRLFPDSNLETVLNNDGLSPLMMAAKTGKIGVFQHIIRREVTDEDTRHLSRKF  
KWAYGPVYSSLYDLSSLDTCGEEVSVLEILVYNSKIENRHEMLAVEPINELLRDKWR  
KFGAVSFYINVVSYLCA MVIFTLTAYYQPLEGTPPYRTTVDYLRRLAGEVITLLTGVLFF  
FTSIKDLFMKKCPGVNSLFDGVSFQLLYFIYSVLVVSAALYLAGIEAYLAVMVFALVL  
GWMNALYFTRGLKLTGTYSIMIQLFKDLFRFLLVYLLFMIGYASALVLLNPCTNM  
KVCNEDQSNCTVPSYPACRDSETFSAFLDLFKLTIGMGDLEMLSSAKYPVVFILLVT  
YIILTFVLLNMLIALMGETVGQVSKEKHIWKLQWATTILDIER SFVFLRKAFRSGE  
MVTVGKSSDGT PDRRWCFRVDEVNWSHWNQNLGIINEDPGKSEIYQYYGFSHTMGR  
LRRDRWSSVPRVVELNKNSTGDEVVPLDNLGNPNC DGHQQGYAPKWRAEDAPL--  
-----

>TRPV4\_Homo\_sapiens

MADSSEGPRAGPGEVAELPGDESGTPGGEAFPLSSLANLFEGEDGSLSPSPADASRPAG  
PGDGRPNLRMKFQGAFRKGVNPNIDLLESTLYESSVVPKPKAPMDSLFDYGTYRHHS  
SDNKRWRKKIIEKQPQSPKAPAPQPPILKVFNRPIFDIVSRGSTADLDGLLPFLTH  
KKRLTDEEFREPSTGKTCLPKALLNLSNGRNDTIPVLLDIAERTGNMREFINSPFRDIY  
YRGQTALHIAIERRCKHYVELLVAQGADVHAQARGRFFQPKDEGGYFYFGELPLSLAA  
CTNQPHIVNYLTENPHKKADMRRQDSRGNTVLHALVAIADNTRENTKFVTKMYDLL  
LLKCARLFPDSNLEAVLNNDGLSPLMMAAKTGKIGIFQHIIRREVTDEDTRHLSRKF  
KWAYGPVYSSLYDLSSLDTCGEEASVLEILVYNSKIENRHEMLAVEPINELLRDKWRK  
FGAVSFYINVVSYLCA MVIFTLTAYYQPLEGTPPYRTTVDYLRRLAGEVITLFTGVLFF  
FTNIKDLFMKKCPGVNSLFDGVSFQLLYFIYSVLVIVSAALYLAGIEAYLAVMVFALVLG  
WMNALYFTRGLKLTGTYSIMIQLFKDLFRFLLVYLLFMIGYASALVLLNPCANMKV  
CNEDQTNCTVPTYPSCR DSETFSTFLDLFKLTIGMGDLEMLSSTKYPVVFILLVTYIIL  
TFVLLNMLIALMGETVGQVSKEKHIWKLQWATTILDIER SFVFLRKAFRSGEMVT  
VGKSSDGT PDRRWCFRVDEVNWSHWNQNLGIINEDPGKNETYQYYGFSHTVGR LRR  
DRWSSVPRVVELNKN SNPDEVVPLDSMGNPRCDGHQQGYPRKWRTDDAPL-----  
-----

>TRPV4\_Loxodonta\_africana\_fragment

KQPQSPKAPAPQPPVVKVFNRPIFDIVSRGSTTDL DGLLPFLTHKKRLTDEEFREP  
STGKTCLPKALLNLSNGRNDTIPLLLDIAERTGNMREFINSPFRDVYYRGQTALHIAIE  
RCKHYVELLVAQGADVHAQARGRFFQPKDEGGYFYFGELPLSLGACTNQPHIVNYLT  
EPHKKADMRRQDSRGNTVLHALVAIADNRENTKFVTKMYDLLLLKCARLFP SNLEAV  
LNNDGLQPQMVAYNNKIYVFQHIIRREVTDEDTRHLSRKF KWAYGPVYSSLYDLSS  
LDTCGEEASVLEILVYNSKIENRHEMLAVEPINELLRDKWRKFGAVSFYISVVSYLCA  
MVIFTLTAYYQPLEGTPPYRTTVDYLRRLAGEIITLFTGVLFFFTNIKDLFMKKCPGVNS  
LFIDGVSFQLLYFIYSVLVIVSAALYLAGIEAYLAVMVFALVLGWMNALYFTRGLKLTGT  
YSIMIQLFKDLFRFLLVYLLFMIGYASALVLLNPCANMKVCNQDQTNCSVPTYPSCR  
DSETFSTFLDLFKLTIGMGDLEMLSSAKYPVVFILLVTYIILTFVLLNMLIALMGETV  
GQVSKEKHIWKLQWATTILDIER SFVFLRKAFRSGEMVTVGKSSDGT PDRRWCFR

VPSACWDAQNGSLCQSSAPRSGKMELWSLFYESFVVKRLPRARTDLSVPRVVELNKSS  
NQDEVVPLDTMGPSCDSHQSYPPKYGGPTTPP-----  
-----  
-----

>TRPV4\_Bos\_taurus

MADPGEGPRVGPGEAESPGEDESPPGGEAFPLSSLANLFEGEDGSPSPSPADGGRST  
GPGDGRPNLRMKFQGAFRKGVNPIDLLESTLYESSVVPKPKAPMDSLFDYGTYRH  
HPSDNKRWRKRVIEKQPQSPKAPAPQPPILKVFNRPIFDIVSRGSTADLDGLLPFL  
THKKRLTDEEFREPSTGKTCLPKALLNLSNGRNDTIPVLLDIAERTGNMREFINSPFRD  
IYYRGQTALHIAIERRCKHYVELLVAQGADVHAQARGRFFQPKDEGGYFYFGELPLSLA  
ACTNQPHIVNYLTENPHKKADMRRQDSRGNTVLHALVAIADNTRENTKFVTKMYDL  
LLLKCARLFPDSNLEAVLNNDGLSPLMMAAKTGKIGIFQHIIIRREVTDEDTRHLSRKFK  
DWAYGPVYSSLYDLSSLDTCGEETSVEILVYNSKIENRHEMLAVEPINELLRDKWRK  
FGAVSFYINVVSYLICAMVIFTLTAYYQPLEGTPPYRTTMDYLRLAGEIITLFTGILFFF  
TNIKDLFMKKCPGVNSLFDGFSQLLYFIYSVLVIVSAALYLAGIEAYLAVMVFALVLGW  
MNALYFTRGLKLTGTYSIMIQKILFKDLFRLLVYLLFMIGYASALVSLNPCANLKVCD  
EDHANTVPTYPSCRDSETFSTFLDLFKLTIGMGDLEMLSSTKYPVVFILLVITYIILTF  
VLLLNMLIALMGETVGQVSKESKHIWKLQWATTILDIERFVFLRKAFRSGEMVTVG  
KSSDGTDDRWCFRVDEVNWSHWNQNLGIINEDPGKNENYQYYGFSHTVGRLLRDR  
WSSVPRVVELNKNSNPDEVVPLDNVGNPSCDGHQSYPPKWRTDDAPL-----  
-----  
-----

>TRPV4\_Ornithorhynchus\_anatinus\_fragment

KETPSVKAPAPHPPIPKVFNRPIFDIVSRGSTADLDGLLSFLLTHKKRLTDEEFREPS  
TGKTCLPKALLNLCNGRNDTIPLLLDIAERTGNTREFINSPFRDVYYRGQTALHIAIER  
RCKHYVELLVALGADVHAQARGRFFQPKDEGGYFYFGKAGGGGARGLAGGQGRGETE  
GWHGTRGDRGGXKFVTKMYDLLLLVQCKKQFPDRHLETVLNNDGLSPLMMAAKTGKI  
GVFQHIIIRREVKDEEVRHLSRKFKDWAYGPVYSSLYDLSSLDTCGEEASVLEILVYNSKI  
EVSARATRSTRRWSWPGSRGTRGASPTDGVGSKPRIASNCSEFIYSVLVMVSALYLGGV  
EAYEAVMVFALVGMNLYFTRGLKLTGTYSIMIQKILFKDLFRLLVYLLFMIGYASA  
LVSLNPCPGREACPRGQSNCTVPTYPSCRDSETFVFLDLFKLTIGMGDLEMLGSTK  
YPVVFVILLVITYIILTFVLLLNMLIALMGETVGQVSKQSKHIWKLQ-----  
-----  
-----  
-----  
-----

>TRPV4\_Oryctolagus\_cuniculus\_fragment

EPSTGKTCLPKALLNLSNGRNDTIPALLDIAERTGNMREFINAPFRDIYYRGQTALHIAI  
ERRCKHYVELLVAQGADVHAQARGRFFQPKDEGGYFYFGELPLSLAACTNQPHIVNYL  
TENPHKKADMRRQDSRGNTVLHALVAIADNTRENTKFVTKMYDLLLLKCARLFPDS  
NLEAVLNNDGLSPLMMAAKTGKIGIFQHIIIRREVTDEDTRHLSRKFKDWAYGPVYSSLY  
DLSSLDTCGEEASVLEILVYNSKIENRHEMLAVEPINELLWDKWRKFGAVSFYINVVS  
YLCAMVIFTLTAYYQPLEGTPPYRTTVDLRLAGEIITLLTGVLFFLTSIKDCHEKCP

GVNSLFVDGSFQLLYFIYSVLVIVSAALYLAGLEAYLAVMVFALVLGWMNALYFTRGLK  
LTGTYSIMIQLFKDLFRFLLVYLLFMIGYASALVSLTPCANMKVCDEGQSNCTTPTY  
PSCRDETFSTFLLDLFKLTIGMGDLEMLGSAKYPVVFILLVITYIILTFVLLLNMLIALM  
GETVGQVSKESKHIWKLQWATTILDIERSPVFRKAFRSGEMVTVGKSSDGPDRR  
WCFRVDEVNWSHWNQNLGIINEDPGKNETYQYYGFSHTVGRLRRDRWSSVPRVVE  
LKNSNPDEVVPLAHVGNPSGPGHQSHPPWRTDDAPA-----  
-----  
-----

>TRPV4\_Canis\_familiaris

MADPSEGPHTGPGEVAETPGDESGTPGSEAFPLSSLANLFEGEDGSPSPSPADTGRPA  
GPGDGRPNLRMKFQGAFRKGVNPNIDLLESTLYESSVVPKPKAPMDSLFDYGTYRH  
HPSDNKRWRKKVIEKQPQSPKAPAPPPPILKVFNRPIFDIVSRGSTTDLGLLPFL  
THKKRLTDEEFREPSTGKTCLPKALLNLSNGRNDTIPVLLDIAERTGNMREFINSPFRD  
IYYRGQTALHIAIERRCKHYVELLVAQGADVHAQARGRFFQPKDEGGYFYFGEPLSLA  
ACTNQPHIVNYLTENPHKKADMRRQDSRGNTVLHALVAIADNTRENTKFKVTKMYDL  
LLLKCARLFPDSNLEAVLNSDGLSPLMMAAKTGKIGVFQHIIRREVTDEDTRHLSRKF  
KWAYGPVYSSLYDLSSLDTCGEEASVLEILVYNSKIENRHEMLAVEPINELLRDKWR  
KFGAVSFYINVVSYLAMVIFTLTAYYQPLEGTPPYRRTVDYLRRLAGEIITLFTGVLF  
FFTNIKDLFMKKCPGVNSLFIDGSFQLLYFIYSVLVIVSAALYLAGIEAYLAVMVFALVLG  
WMNALYFTRGLKLTGTYSIMIQLFKDLFRFLLVYLLFMIGYASALVSLNPCANMKV  
CSEDHTNCTVPTYPSCRDETFSTFLLDLFKLTIGMGDLEMLSSTKYPVVFILLVITYIIL  
TFVLLLNMLIALMGETVGQVSKESKHIWKLQWATTILDIERSPVFLRKAFRSGEMVT  
VGKSSDGTDRRWCFRVDEVNWSHWNQNLGIINEDPGKSENYQYYGFSHTVGRLRR  
DRWSSVPRVVELNKNNSNPDEVVPLDNMGNPSCDGHQQSYPPKWRTDDAPL-----  
-----  
-----

>TRPV4\_Normascus\_leucogenys

MADSSEGPRTPGPGEVAELPGDESGTPGGEAFPLSSLANLFEGEDGSPSPLPADASRPAG  
PGDGRPNLRMKFQGAFRKGVNPNIDLLESTLYESSVVPKPKAPMDSLFDYGTYRHHP  
SDNKRWRKKIIDGLLLCFYSPIHHPPLYLFPPIRNLGEEMLTARTSEPLPSALTASSC  
MSLLEPSTGKTCLPKALLNLSNGRNDTIPVLLDIAERTGNMREFINSPFRDIYYRGQT  
ALHIAIERRCKHYVELLVAQGADVHAQARGRFFQPKDEGGYFYFGEPLSLAACTNQPH  
HIVNYLTENPHKKADMRRQDSRGNTVLHALVAIADNTRENTKFKVTKMYDLLLLKCA  
RLFPDNNLEAVLNNDGLSPLMMAAKTGKIGNRHEMLAVEPINELLRDKWRKFGAVS  
FYINVVSYLAMVIFTLTAYYQPLEGTPPYHTTVDYLRRLAGEVITLFTGVLFFFTNIK  
DLFMKKCPGVNSLFIDGSFQLLYFIYSVLVIVSAALYMAGIEAYLAVMVFALVLGWMN  
ALYFTRGLKLTGTYSIMIQLFKDLFRFLLVYLLFMIGYASALVSLNPCANMKVCNE  
DQTNCTVPTYPSCRDETFSTFLLDLFKLTIGMGDLEMLSSTKYPVVFILLVITYIILTFV  
LLNMLIALMGETVGQVSKESKHIWKLQWATTILDIERSPVFLRKAFRSGEMVTVGK  
SSDGTDRRWCFRVDEVNWSHWNQNLGIINEDPGKNETYQYYGFSHTVGRLRRDR  
WSSVPRVVELNKNNSNPDEVVPLDSMGNPRCDGHQQGYPPKWRTDDAPL-----  
-----  
-----

>TRPV4\_Gorilla\_gorilla\_fragment



RKQPQSPKAPAPQPAPILKVFNRPIFDIVSRGSTADLDGLLPFLLTTHKKRLTDEEFRE  
PSTGKTCLPKALLNLSNGRNDTIPVLLDIAERTGNMREFINSPFRDIYYRGQTALHIAIE  
RRCKHYVELLVAQGADVHAQARGRFFQPKDEGGYFYFGELPLSLAACTNQPHIVNYLT  
ENPHKKADMRRQDSRGNTVLHALVAIADNTRENTKFVTKMYDLLLLKCARLFPDSN  
LEAVLNNDGLSPLMMAAKTGKIGIFQHIIIRREVTDEDTRHLSRKFKDWAYGPVYSSLY  
DLSSLDTCGEEASVLEILVYNSKIENRHEMLAVEPINELLRDKWRKFGAVSFYINVVSY  
LCAMVIFTLTAYYQPLEGTPPYRYRTTVDYLRRLAGEVITLFTGVLFFFTNIKDLFMKKC  
PGVNSLFDIGSFQLLYFIYSVLVIVSAALYLAGIEAYLAVMVFALVLGWMNALYFTRGLK  
LTGTYSIMIQLFKDLFRFLLVYLLFMIGYASALVSLNPCANMKVCNEDQTNCTVPT  
YPSCRDSGTFSTFLLDLFKLTIGMGDLEMLSSTKYPVVFILLVTYIILTFVLLNMLIAL  
MGETVGQVSKESKHIWKLQWATTILDIERSFVFLRKAFRSGEMVTVGKSSDGTDR  
RWCFRVDEVNWSHWNQNLGIINEDPGKNETYQYYGFSHTVGRLRRDRWSSVPRV  
ELNKNSNPDEVVPLDSMGNPRCDGHQGGYPPKWRTDDAPL-----  
-----  
-----

>TRPV4\_Cavia\_porcellus

MADPGDSPCAGSGELAEPGLGDDSGTAGGEAFPLSSLANLFEGEEGSSAPSPAEAGRPTA  
QGDGRPNLRMKFQGAFRKGVNPIDLLESTLYESSVVPGPKKAPMDSLFDYGTYRHH  
PSDNRWRRRKVIKQPQSPKAPAPQPPILKVFNRPIFDIVSRGSTADLDGLLPFLLT  
HKKRLTDEEFREPSTGKTCLPKALLNLSNGRNDTIPMLLDIAERTGNMREFINSPFRDI  
YYRGQTALHIAIERRCKHYVELLVAQGADVHAQARGRFFQPKDEGGYFYFGELPLSLA  
ACTNQPHIVNYLTENPHKKADMRRQDSRGNTVLHALVAIADNTRENTKFVTKMYDL  
LLLKCARLFPDSNLEAVLNNDGLSPLMMAAKTGKIGIFQHIIIRREVTDEDTRHLSRKFK  
DWAYGPVYSSLYDLSSLDTCGEEVSVLEILVYNSKIENRHEMLAVEPINELLRDKWRK  
FGAVSFYINVVSYLCAMVIFTLTAYYQPLEGTPPYRYRTTVDYLRRLAGEVITLFTGVLF  
TNIKDLFMKKCPGVNSLFDIGSFQLLYFIYSVLVIVSAALYLAGIEAYLAVMVFALVLG  
WMNALYFTRGLKLTGTYSIMIQLFKDLFRFLLVYLLFMIGYASALVSLNPCANMKVC  
NEDGTNCTVPTYPSCRDSDTFSTFLLDLFKLTIGMGDLEMLSSIKYPVVFILLVTYIIL  
FVLLNMLIALMGETVGQVSKESKHIWKLQWATTILDIERSFVFLRKAFRSGEMVTV  
GKNSDGTDRRWCFRVDEVNWSHWNQNLGIINEDPGKSDTYQYYGFSHTVGRLRRD  
RWSSVPRVVELNKNSNPDEVVPLDNLGNPSCDGHQRGHPPKWRTDDAPL-----  
-----  
-----

>TRPV4\_Spermophilus\_tridecemlineatus

MADPSDSPRAGPGDPAEPPGEESGTPGGEAFPLSSLANLFEGEDGSPSPSPADTARPA  
GPGDGRPNLRMKFQGAFRKGVNPIDLLESTLYEASVVPGPKKAPMDSLFDYGTYRH  
HPSDNRWRRRKVMKQPQSPKAPAPQPPILKVFNRPIFDIVSRGSTADLDGLLPFL  
LTHKKRLTDEEFREPSTGKTCLPKALLNLSNGRNDTIPVLLDIAERTGNMREFINSPFR  
DIYYRGQTALHIAIERRCKHYVELLVAQGADVHAQARGRFFQPKDEGGYFYFGELPLSL  
AACTNQPHIVNYLTENPHKKADMRRQDSRGNTVLHALVAIADNTRENTKFVTKMYD  
LLLLKCARLFPDSNLEAVLNNDGLSPLMMAAKTGKIGIFQHIIIRREVTDEDTRHLSRK  
KDWAYGPVYSSLYDLSSLDTCGEEVSVLEILVYNSKIENRHEMLAVEPINELLRDKWR  
KFGAVSFYINVVSYLCAMVIFTLTAYYQPLEGTPPYRYRTTVDYLRRLAGEVITLFTGVLF  
FFTNIKDLFMKKCPGVNSLFDIGSFQLLYFIYSVLVIVSAALYLAGIEAYLAVMVFALVLG  
WMNALYFTRGLKLTGTYSIMIQLFKDLFRFLLVYLLFMIGYASALVSLHPCANMKV

CDEDQTNCTVPTYPSCRDSETFSTFLLDLFKLTIGMGDLEMLSSTKYPVVFHILLVITYIIL  
TFVLLLNMIALMGETVGQVSKESKHIWKLQWATTILDIERSFPVFLRKAFRSGEMVT  
VGKSSDGTDDRWCFRVDEVNWSHWNLGIINEDPGKSETYQYYGFSHTVGRLLR  
DRWSSVPRVVELNKNSSPDEVAVPLDNLGNPSCDSHQSYPPKWRTDDAPL-----  
-----

>TRPV4\_Otolemur\_garnettii

MADSSEGPRGGPAEVAEPPGDDGGTPGGEAFPLSSLANLFEGEDGSPSPPADVGRPPG  
PGDGRPNLRMKFQGAFRKGVNPNIDLLESTLYESSVVPGPKKAPMDSLFDYGYRHHHP  
SDNKRWRKVKIEKQPQSPKAPAPQPPPILKVFNRPIFDIVSRGSTADLDGLLPFLTH  
KKRLTDEEFREPSTGKTCLPKALLNLSNGRNDTIPVLLDIAERTGNMREFINSPFRDIY  
YRGTALHIAIERRCKHYVELLVAQGADVHAQARGRFFQPKDEGGYFYFGELPLSLAA  
CTNQPHIVNYLTENPHKKADMRRQDSRGNTVLHALVAIADNTRENTKQVTKMYDLL  
LLKCARLFPDSNLEAVLNNDGLSPLMMAAKTGKIGIFQHIIREVTDDEDTRHLSRKF  
DWAYGPVYSSLYDLSSLDTCGEEASVLEILVYNSKIENRHEMLAVEPINELLRDKWRK  
FGAVSFYINVVSYLICAMVIFTLTAYYQVPEGTPPYRTTVDYLRRLAGEIITLLTGVLFF  
FTNIKDLFMKKCPGVNSLFIDGSFQLLYFIYSVLVIVSAALYLAGIEAYLAVMVFALVLG  
WMNALYFTRGLKLTGTYSIMIQKILFKDLFRFLVYLLFMIGYASALVSLKPCANMKV  
CNGDPTNCTVPTYPSCRDSDTFSTFLLDLFKLTIGIGDLEMLNSTKYPVVFHILLVITYIIL  
TFVLLLNMIALMGETVGQVSKESKHIWKLQWATTILDIERSFPVFLRKAFRSGEMVT  
VGKSSDGTDDRWCFRVDEVNWSHWNLGIINEDPGKSETYQYYGFSHTVGRLLR  
DRWSSVPRVVELNKNSSPDEVVPLDNLGNPSCDGHQSYPPKWRTDDAPL-----  
-----

>TRPV4\_Sus\_scrofa

MVEPSEGPRTPGGEVAEPPGDESGTSGGEAFPLSSLANLFEGEDGSPSPSLADPGRPTG  
PGDGRPNLRMKFQGAFRKGVNPNIDLLESTLYESSVVPGPKKAPMDSLFDYGYRHHHP  
SDNKRWRKVKIEKQPQSPKAPAPQPPPILKVFNRPIFDIVSRGSTTDLGLLPFLTH  
KKRLTDEEFREPSTGKTCLPKALLNLSNGRNDTIPVLLDIAERTGNMREFINSPFRDIY  
YRGTALHIAIERRCKHYVELLVAQGADVHAQARGRFFQPKDEGGYFYFGELPLSLAA  
CTNQPHIVNYLTENPHKKADMRRQDSRGNTVLHALVAIADNTRENTKQVTKMYDLL  
LLKCARLFPDSNLEAVLNNDGLSPLMMAAKTGKIGIFQHIIREVTDDEDTRHLSRKF  
DWAYGPVYSSLYDLSSLDTCGEEASVLEILVYNSKIENRHEMLAVEPINELLRDKWRK  
FGAVSFYINVVSYLICAMVIFTLTAYYQPLEGTPPYHTTVDYLRRLAGEIITLFTGVLFF  
FTNIKDLFMKKCPGVNSLFIDGSFQLLYFIYSVLVIVSAGLYLAGIEAYLAVMVFALVLG  
WMNALYFTRGLKLTGTYSIMIQKILFKDLFRFLVYLLFMIGYASALVSLNPCANMKV  
CSEDHTNCTVPTYPSCRDSETFSTFLLDLFKLTIGMGDLEMLSSTKYPVVFHILLVITYIIL  
TFVLLLNMIALMGETVGQVSKESKHIWKLQWATTILDIERSFPVFLRKAFRSGEMVT  
VGKSSDGTDDRWCFRVDEVNWSHWNLGIINEDPGKNESYQYYGFSHTVGRLLR  
DRWSSVPRVVELNKNSNPDEVVPLDNMGKPSCDGHQSYPPKWRTDDAPL-----  
-----

>TRPV4\_Ailuropoda\_melanoleuca

MADPSEPHAGPGEVAESPGDESGTPGGEAFPLSSLANLFEGEDGSPSPSPADPGRPA  
GPGDGRPNLRMKFQGAFRKGVNPNIDLLESTLYESSVVPGPKKAPMDSLFDYGYRHH  
HPSDNKRWRKVKIEKQPQSPKAPAPQPPPILKVFNRPIFDIVSRGSTTDLGLLPFL

THKKRLTDEEFREPSTGKTCLPKALLNLSNGRNDTIPALLDIAERTGNMREFINSPFR  
DIYYRGPLSVLHIAIERRCKHYVELLVAQGADVHAQARGRFFQPKDEGGYFYFGELPLS  
LA ACTNQP HIVNYLTENPHKKADMRRQDSRGNTVLHALVAIADNTRENTK FVT KMY  
D L L L L K C A R L F P D S N L E A V L N N D G L S P L M M A A K T G K I G V F Q H I I R R E V T D E D T R H L S R  
K F K D W A Y G P V Y S S L Y D L S S L D T C G E E A S V L E I L V Y N S K I E N R H E M L A V E P I N E L L R D K  
W R K F G A V S F Y I N V V S Y L C A M V I F T L T A Y Y Q P L E G T P P Y P Y R T T V D Y L R L A G E V I T L F T G  
V L F F F T N I K D L F M K K C P G V N S L F I D G S F Q L L Y F I Y S V L V I V S A A L Y L A G I E A Y L A V M V F A L  
V L G W M N A L Y F T R G L K L T G T Y S I M I Q I L F K D L F R F L L V Y L L F M I G Y A S A L V S L L N P C A N  
M K V C S E D H T N C T V P T Y P S C R D S E T F S T F L L D L F K L T I G M G D L E M L G S T K Y P V V F I L L V  
T Y I I L T F V L L L N M L I A L M G E T V G Q V S K E S K H I W K L Q W A T T I L D I E R S F P V F L R K A F R S G  
E M V T V G K S S D G T P D R R W C F R V D E V N W S H W N Q N L G I I N E D P G K S E N Y Q Y Y G F S H T V G  
R L R R D R W S S V P R V V E L N K N S N Q D E V V V P L D N M G N P S C D G H Q Q S Y P P K W R T D D A P  
L-----

>TRPV4\_Mus\_musculus

MADPGDGPRAAPGEVAEPPGDES GTS GG EAFPLSS LANLFEGEEGSSSLSPVDASRPAG  
PGDGRPNLRMKFQGA FRKGVNPIDLLESTLYESSVVP GPKKAPMDSLFDYGT YRHHP  
SDNKRWRKVV EKQPQSPKAPAPQPPILKVFNRPI LFDIVSRGSTADLDGLLSFLLTH  
KKRLTDEEFREPSTGKTCLPKALLNLSNGRNDTIPVLLDIAERTGNMREFINSPFRDIY  
YRGQTS LHIAIERRCKHYVELLVAQGADVHAQARGRFFQPKDEGGYFYFGELPLSLAA  
CTNQP HIVNYLTENPHKKADMRRQDSRGNTVLHALVAIADNTRENTK FVT KMYDLL  
LLKCSRLFPDSNLETVLNNDGLSPLMMAAKT G K I G V F Q H I I R R E V T D E D T R H L S R K F K  
D W A Y G P V Y S S L Y D L S S L D T C G E E V S V L E I L V Y N S K I E N R H E M L A V E P I N E L L R D K W R K  
F G A V S F Y I N V V S Y L C A M V I F T L T A Y Y Q P L E G T P P Y P Y R T T V D Y L R L A G E V I T L F T G V L F F  
F T S I K D L F T K K C P G V N S L F V D G S F Q L L Y F I Y S V L V V S A A L Y L A G I E A Y L A V M V F A L V L G  
W M N A L Y F T R G L K L T G T Y S I M I Q I L F K D L F R F L L V Y L L F M I G Y A S A L V T L L N P C T N M K  
V C D E D Q S N C T V P T Y P A C R D S E T F S A F L L D L F K L T I G M G D L E M L S S A K Y P V V F I L L L V T Y I  
I L T F V L L L N M L I A L M G E T V G Q V S K E S K H I W K L Q W A T T I L D I E R S F P V F L R K A F R S G E M V  
T V G K S S D G T P D R R W C F R V D E V N W S H W N Q N L G I I N E D P G K S E I Y Q Y Y G F S H T V G R L R R  
D R W S S V P R V V E L N K N S S A D E V V V P L D N L G N P N C D G H Q Q G Y A P K W R T D D A P L-----  
-----

>TRPV4\_Latimeria\_chalumnae

MGDVEEQNKLNSSGDANDTRTEDGSQQNDAFPLSS LANLFENE EGATATDTAKAPQ  
TAGDGKQNLRMKFHGAFKKGMPNPMDDLLESTIYESPVVPAPK KAPMDSLFDYGT YH  
QYPTENKRRRKRII HDKQSPNQKTQAPNPPPILKVFNRPI LFDIVSRGTAAELDGLLAF  
LVTHKKRLADEEFREPSTGKTCLPKALLNL TNGKNDTIPILVEIAEKTGNLREFINSPF  
RDVYYRGQTALHIAIERRCKQYVELLVEKGADVHAQARGRFFQPRDEGGYFYFGELPL  
SLAACTNQP DIVHYLIENAHKKADLRRQDSRGNTVLHALVAIADNTRENTK FVT KMY  
DMLLIKCAKLFPECNLEAILNNDGMSPLMMAAKLGKIGIFKYIIRREVM DENARHL SR  
KFKDWAYGPVYSSLYDLSSLDTCGMEVSVLEILVYNSRIENRHEMLAVEPINELLRDK  
WRKFGAVSFYISVVSYL VAMVIFTLIAYYRPVEGRPPYPYKTTIDYLR LAGEVITLLTGIF  
FFFTNIKDLFLKKCPGVNSLLIDGSFQLLYFIYSVLVLTAAALYLTGIEAYVAVMV FALVL  
GWMNTLYFTRGLKLTGTYSIMLQKILFKDLFRFLLVYVLFMIGYASALVSLLN PCLTTE  
TCTANNASCTAPEYPYCRDSNTFGKFIMDLFKLTIGMGDLEMVNSAKYPGVFIILLV TY  
IILTFVLLL NMLIALMGETVGQVSKESKQIWKLQWATTILD IERSFPVFLRRVFRSGEM  
VTVGKNLDGTPDRRWCFRVDEVNWSHWNQNLGIINEDPGKNETYQYYGFSHTMGR

LRRDRWSTVVPVVVELNKTTPRADEVVVSLDPMGMSNVHDTKRGDPHNWKKDETQI-

>TRPV4\_Oreochromis\_niloticus

MNEGRSAIFKRRHLALPKANAISSSEPSISVDLGDSEAAQPEGDGAFPLSEFSLFESQD  
GSPATQDSSQESILEPAQPGHPADSRQYLRMKFHGAFKKGISNPMDLLESTIYESNVVP  
APKKAPMDSLFDYGTYGSSNQKKRRKKLPGKTEASCDESQSSDPPKVVVFNRSL  
FDCVSRGDPGELEGLLEYLQSNKRRLTDEEFREPYTGKTCCLKALMNLYGRQNTIPV  
LVDIAEKNGSLREFINTPFRDVYYRGQTALHIAIERRCKQYVKKLVEKGADVHAQARG  
RFFQPKDEGGYFYFGELPLSLAACTNQPDIVHYLTENPHKKADVRRQDSRGNTVLHAL  
VHIADNTKDNTRFLTKMYDLLLIKAKLYPDCNLETVPNNDGMSPLMMAARLGKIGI  
FQHIIREIKDEEVRHLSRKFKDWAYGPVYSSLYDLSSLDTCGKESSVLEILVYTSNEN  
RHEMLAVEPINELLRAKWNRFAAVTFYISVFSYLITMIIFTLVAYYQPTHGKPPYPHTT  
SSDYWRLAGEIVTLASGIFFLTNIKDLFLKKCPGVKSLFIDGSFQLLYFIYSVLIIVTAAL  
YLSGIEAYVSMVVFALALGWMNTLYFTRGLKLTGTYSIMIQLFKDLFRLLVYVLFM  
IGFASALVSLTVCPPPGTVCNGSCPTYPACRDNNTFSIFLLDLFKLTIGMGDLDMIYSA  
QNPVVFLILLVYIILTFVLLLNMLIALMGETVGQVSKESKKIWKLQWATTILDIERSFP  
VCLRKSFRVGMVTVGKNYDGTDDRWCFRVDEVNWCWQNLAINEDPGKSETI  
QANGLQQGVRALRRDRWSTVVPRAVELSKGSQSHDLAVEMEPLSPRH-----

>TRPV4\_Meleagris\_gallopavo

MADPEDPRDAGDALGDDSFPLSSLANLFEVEDTSSPAEPSRGPPGAGDGKQNLRMKF  
HGAFRKGPPKPMELLESTIYESSVVPAPKKAPMDSLFDYGTYRQHPSENKRWRRRVV  
EKPVAGTKGPAPSPPPVLKVFNRPIFDIVSRGSPDGLLEGLSFLTHKKRLTDEEFREP  
STGKTCCLKALLNLSAGRNDTIPILLDIAEKTGNMREFINSPFRDVYYRGQTALHIAIER  
RCKHYVELLVEKGADVHAQARGRFFQPKDEGGYFYFGELPLSLAACTNQPHIVHYLTE  
NGHKQADLRRQDSRGNTVLHALVAIADNTRENTKVFVKMYDLLLIKCAKLPDNTLE  
ALLNNDGLSPLMMAAKTGKIGIFQHIIREIADEDVRHLSRKFKDWAYGPVYSSLYDLS  
SLDTCGEEVSVLEILVYNSKIENRHEMLAVEPINELLRDKWRKFGAVSFYISVVSYLCA  
MIIFTLIAYYRPMEGPPPYPTTTIDYLRAGEIITLLTGILFFSNIKDLFMKKCPGVNS  
FFIDGSFQLLYFIYSVLIITAGLYLGGVEAYLAVMVFALVLGWMNALYFTRGLKLTGT  
YSIMIQLFKDLFRLLVYLLFMIGYASALVSLNCPSSSESCSEHSNCTLTPTPSCRD  
SQTFTFLDLFKLTIGMGDLEMLESAYKPGVFILLVYIILTFVLLLNMLIALMGETVG  
QVSKESKHIWKLQWATTILDIERSFPLFLRRAFRSGEMVTVGKGTGTPDRRWCFRV  
DEVNWSHWNQNLGIISEDPGKSDTYQYYGFSHTVGRLRRDRWSTVVPVVVELNKSCP  
TEDVVVPLGTMGTAEARERRHGQNSSSL-----

>TRPV4\_Gallus\_gallus

MADPEDPRDAGDVLGDDSFPLSSLANLFEVEDTSPPAEPSRGPPGAVDVGKQNLRMKF  
HGAFRKGPPKPMELLESTIYESSVVPAPKKAPMDSLFDYGTYRQHPSENKRWRRRVV  
EKPVAGTKGPAPNPPPIKVFNRPIFDIVSRGSPDGLLEGLSFLTHKKRLTDEEFREP  
STGKTCCLKALLNLSAGRNDTIPILLDIAEKTGNMREFINSPFRDVYYRGQTALHIAIER  
RCKHYVELLVEKGADVHAQARGRFFQPKDEGGYFYFGELPLSLAACTNQPHIVHYLTE  
NGHKQADLRRQDSRGNTVLHALVAIADNTRENTKVFVKMYDLLLIKCAKLPDNTLE

ALLNNDGLSPLMMAAKTGKIGIFQHIIIRREIADEDVRHLSRKFKDWAYGPVYSSLYDLS  
SLDTCGEEVSVLEILVYNSKIENRHEMLAVEPINELLRDKWRKFGAVSFYISVVSYLCA  
MIIFTLIAYYRPMEGPPYPYTTTTIDYLRLAGEIITLLTGILFFFSNIKDLFMKKCPGVNS  
FFIDGSFQLLYFIYSVLVIVTAGLYLGGVEAYLAVMVFALVLGWMNALYFTRGLKLTGT  
YSIMIQLFKDLFRLLVYLLFMIGYASALVSLNCPSSSESCSEDHSNCTLPTYPSCRD  
SQTFTFLDLFKLTIGMGDLEMLES AKYPGVFIILLVYIILTFVLLLNLMLIALMGETVG  
QVSKESKHIWKLQWATTILDIER SFPLFLRRAFRSGEMVTVGKGTGTPDRRWCFRV  
DEVNWSHWNQNLGIISEDPGKSDTYQYYGFSHTVGRLLRRDRWSTVVPVPRVVELNKSCP  
TEDVVVPLGTMGTAEARERRHGQTPSSPL-----  
-----

>TRPV4\_Oryzias\_latipes\_fragment

RADTLGSAGSAASEDCKEGDAQAEGEAAFPSELSQLFESEDGSQSAQDTSQESALEL  
VQPGNPADSRQNLRTKFGAFRKGISHPMDLFEATYIESNVVPAPKKAPMDSLFDYGT  
YGNSSNQKKRRKKLPRGKTEASCDIVPNPDPPKVMKIFNRILLFDCVSRGDPEDLEGLL  
EYLQVHEKRLTDEEFREPSTGKTCLPKALLNLYGGRNNTIPLLVDIAEKTGNLREFINT  
PFRDVYYRGQTALHIAIERRCKHYVELLMEKGADVHAQARGRFFEPKDEGGYFYFGEL  
PLSLAACTNQPNIVNYLTENPHKKADLRRQDSRGNTALHALVHIADNTKDNTRFLTK  
MYDLLLLIKCTKLYPECNLEKMANNDGLTPLMMAAKLGKIGVFQHIIRREIKDEEVRHL  
SRKFKDWAYGPVYSSLYDLSSLETGEEPSVLEILVYNSRNENCHEMLAVEPINELLRA  
KWQKFAAVTFYISVVSYLITMIIFTLVAYYHPTEGKPPFPYTTSTDYLRMVGEIFTLASG  
IFFFLTNIKDLFLKKRPGVKSLVMDGSFQLLYFIYSILIIITAALYLSGIKAYVSVMVFALV  
LGWMNTLYFTRGLKLTGTYSIMIQLKLDIFRLLVYLLFMIGYASALVSLTVCPTSG  
PECEGGCPTYPKCREPGTFSTFLDLFKLTIGMGDLEMINS AQYPEVFLILLVYIILTFV  
LLLNLMLIALMGETVGQVSKESKHIWKLQWATTILDIHSPVCLRRSFRV GEMVTVGK  
NLDGTPDRRWCFRVDEVNWSHWNQNLAIINEDPGRSDTSQTNGLRQSVKGLRRDR  
WTTVVPRVMELSKSPQPHDLVVEMEPLTTRN-----  
-----

>TRPV4\_Tetraodon\_nigroviridis\_fragment

LSKADTLGSDPNGQTSQAEGDAAFPLSDLSQLFESEDASPSAQDTGQASVLGPVPPGQ  
PADGRQNLRMKFQGAFFKKGISNPMDLLESTIYESNVVPGPKKAPMDSLFDYGTYRNP  
SNQKRRRKKLPRGLVKAASCDDGQADDPPKVLKVFNRSLLFDCVSRADAEALEGLL  
EYLQSREKRLTDEEFREPSTGKTCLPKALLNLYSGQNVTIPLLVDIAERTGNLRELLNT  
PFRDVYYRGQTALHIAIERRCKQYVELLVEKGADVHAQARGRFFQPRDEGGYFYFGEL  
PLSLAACTNQPDIVHYLTENPHKKADLRRQDSRGNTVLHALVHIADNTKDNTRFLTK  
MYDLLLLIKSAKLYPCNLETVLNNDGMSPLMMAAKLGKIGVFQHIIRREIKDEEVRHL  
SRKFKDWAYGPVYSSLYDLSSLDTCGEEPSVLEILVYNSRTENHHEMLAVEPINELLRA  
KWQKFAAVSFYVSVVSYLTTMIIFTLVAYYHPVQGKPPHPYTTSSDYLRMAGEVITLA  
SGIFFFLTNIKDVFLKKCPGVKSLVIDGSFQLLYFIYSVLIVVSAALYLSGIEAYMSVMVF  
ALVLGWMNALYFTRGLKLTGTYSIMIQLFKDLFRLLVYVLFMIGYASALVSLTVC  
PPPGTECEGGCPTYPKCRDPDTFSTFLDLFKLTIGMGDMIWDSARYPAVFLILLITYII  
LTFVLLLNLMLIALMGETVGQVSKQSKKVVWKLQWATTILDIER SFVCLRKSFRAGEMV  
TVGRNSDGTDRRWCFRVDEVNWSHWNQNLAIINEDPGKNETCQANGLQQGVRAL  
RRDRWSTVVPRALELSKGP HHRDLVIEMEPLTPRH-----  
-----

>TRPV4\_Danio\_rerio

QGFSASTLLKRYRLAMTESLSVSSPPDNSAQDSSEAADGDPNFPMSMAALLENDVVS  
QPHELPRPGQQNDQKQNMIRIRFPGPFKKGVPNPMDLLESYTEYPKQAPMDSMFD  
YGTQRQINNNKKGRRKLLPRGKAEIGMSCDEGSPEPPVLKVFNRWMLFEAVSRADPR  
ALDGLLQYLQSHEKRLTDEEFKELSTGKTCLPKALLNLHNGQNDTIPILVDIAEQTGNL  
REFINTPFRDVYYRGQMALHIAIERRCKQYVELLVEKGADVHAQARGRFFQPRDEGGY  
FYFGELPLSLAACTNQPD MVHYLTENGHKKADLRRQDSRGNTVLHALVHIADNTRD  
NTRFVTKMFDLLLIKCAKLYPDCNLENILNNDGMSPLMMAAKLGKIGVFQHIIRREIK  
DEEARHLSRKFKDWAYGPVYSNLYDLSSLDTCGEEVSVLEILVYNSKIENRHEMLAVE  
PINELLRAKWQKFAAVTFYISVFSYLVMTMIIFTLVAYYRPSVKGPPYAYDTTEDKVRLA  
GEIITVGSGLFFFVTNIKDLFLKCKPGVNSIFVDGSFQLLYFIYSVLVLSAALYLSGIEAY  
VSMVFALTLGWMNTLYFTRGLKLTGTYSIMIQLIKDLFRFLLVYVLFMIGYASALV  
SLLTICPKDCKENCPTYPECRDTNTFSEFLDLFKLTIGIGDLNMLKGAQYPAVFLI  
LLVTYIILTFVLLLNLMLIALMGETVGQVSKESKIKWKLQWATTILDIERSFVCLRRSFR  
VGEMVTVGKGLDGKPKDKRWCFRVDEVKWSHWNQNLGIINEDPGQKDLSEHTQGGGR  
GLRRDRWSTVVRVVELNRGSRDHTVEMEPLTGRHRLKSES-----  
-----

>TRPV4\_Takifugu\_rubripes

TLSSDCSGPAAHASANNGRTAQAEGDAAFPLSELSQLFESEDASPSAQGASQEPAPPG  
QPDSRQNLRMKFGQAFKKGISNPMDLLESTIYESNVVPGPKKAPMDSLFDYGTYRN  
TSNQKRRRKKLPRGKTETSCDEGLAADPPKVLKVFNRSLLFDCVSRADAEALEGLLEY  
LQSQEKRLTDEDFREPSTGKTCLPKALLNLYGGQNVTIPLADIAEKTGNLREFINTPF  
RDVYYRGQTALHIAIERRCKPYVELLVEKGADVHAQARGRFFQPRDEGGYFYFGELPL  
SLAACTNQPDIVHYLTENPHKKADLRRQDSRGNTVLHALVHIADNTKDNTRFLTMY  
DLLIKSAKLYPDCSLETVLNNDGMSPLMMAAKLGKIGVFQHIIRREIKDEEARHLSRK  
FKDWAYGPVYSSLYDLSSLDTCGEEPSVLEILVYNSRNENRHEMLAVEPINELLRAKW  
QKFAAVTFYISVVSYLITMIIFTLVAYYHPTQKPPYPYTTSSDYLRMAGEVITLASGIF  
FLTNIKDVFLKCKPGVKSFLIDGSFQLLYFVYSVLIVISAALYLSGIEAYVSMVFALVLG  
WMNTLYFTRGLKLTGTYSIMIQLIKDLFRFLLVYVLFMIGYASALVSLTVCPPPGT  
ECDGGCPTYPKCRDPDTFSTFLDLFKLTIGMGELDMIHSAQYPAVFLILLVTYIILTFV  
LLLNLMLIALMGETVGQVSKQSKIKWKLQWATTILDIERSFVCLRKSFRAGEMVTVGK  
NCDGTPDRRWCFRVDEVNWCHWNQNLAIINEDPGKNETCQATGLQQGVRALRRDR  
WSTVVRALLESKGPHNRLAIEMEPLTPRH-----  
-----

>TRPV4\_Xenopus\_tropicalis

MADPSHLLKHNASVDIDDSQGGDGSNHNSFPLSSLANLFENEESAPNEGVRSPQVP  
GDNKQNLIRIFQGPFRKGISNPMDLLESTIYESSAPKKAPMDSLFGYETYHHHPTENR  
RKRKKILLEKENLNSQAPSPDPPPIKMFNRHMLFDIVSRGSTAELEGFLPFLLAQKKR  
LTDEEFREASTGKTCLTKALMNLNGGKNDTIPMLIDIAEKTGNLREFINSPFRDVYYR  
GQTALHIAIERRCKHYVELLVEKGADVHAQARGRFFQPKDEGGYFYFGELPLSLAACT  
NQPDIVHYLTENAHKKADIRRRQDSRGNTVLHALVAIADNTRENTKFVTKVYDLLVIK  
VKLYPDSLEAIFNDSMSPLMMAAKLGKIGIFQHIIRLEIKDEEARHLSRKFKDWAYG  
PVYSSLYDLMLDTCGEEVSVLEILVYNSKVENRHEMLAVEPINELLRDKWQKFGAVS  
FYISVVSYLAMIIFTLIAYYRPMDGTPPYPYRTTMDYMLRAGEIVTLLTGVVFFITNIKD

LFMKKCPGVNSLFIDGSFQLLYFIYSVLVIITAVLYLVGIESYLAVMVFALVLGWMNALY  
FTRGLKLTGTYSIMLQKILFKDLFRLLVYLLFMIGYASALVSLNPNCTSQESCIIETSSNC  
TVPEYPSCRDSSTFSKFLDLFKLTIGMGDLEMINSKYPVAVFIILLVTYIILTFVLLNM  
LIALMGETVGQVSKEKQIWKLQWATTILDIERSFPVCMRKAFRSGEMVTVGKNLDG  
TPDRRWCFRVDEVNWSHWNQNLGIINEDPGRNDGYQYYGFSQTVGRLRRDRWSVV  
VPRVVELNKAPQHSDDVVVPLGNIPQVQTYSQLQENAQNWKKDETHI-----  
-----

>TRPV4\_Elaphe\_quadriregata

MANLEDAAHASPSESTESPSEELSPQNDSFPLSSLANLFENEDGAPAAEAARTPPGAG  
DGKQNLRMKFHGAFRKGVNPNMDLLESTIYESSVVPKPKAPMDSLFDYGTTRHHPS  
DNKRRRKKALEKKPPSTKGPAPHPPIPKVFNRPILFDIVSRGSTADLDGLLPFLTHK  
KRLTDEEFREPSTGKTCLPKALLNLNNGKNDTIPFLLDIAEKTGSTREFINSPFRDVY  
RGQTAHIAIERRCKHYVELLVEKGADVHAQARGRFFQPKDEGGYFYFGELPLSLAAC  
TNQPHIVQYLTEHAHKQADLRRQDSRGNTVLHALVAIADNTRENTKFTVTKMYDILLI  
KCAKLPDNTNLEALLNNDGLSPLMMAAKTGKIGMFQHIIRREVKDEEARHLSRKFRD  
WAYGPVYSSLYDLSSLDTCGEEVSVLEILVYNSKIENRHEMLAVEPINELLRDKWRKF  
GAVSFYISVVSYLECAMVIFTLVAYYRPLEGTPPYPTTTTPDYLCCLAGEIVTLFTGVLFFFT  
NIKDLFMKKCPGVNSFFIDGSFQLLYFIYSVLVLAALYLAGIEAYLAVMVFALVLGW  
MNALYFTRGLKLTGTYSIMIQKILFKDLFRLLVYVLFMIGYASALVSLNPNPCPSAESC  
GDHSNCTAPAYPSCRDSKTFSTFLDLFKLTIGMGDLEMIENAKYPGVFVILLVTYIIL  
FVLLNMLIALMGETVGQVSKEKQIWKLQWATTILDIERSFPVFRRAFRSGEMVTV  
GKSLDGAPDRRWCFRVDEVNWSHWNQNLGIISEDPGKNDTYQYYGFSHTVGRLLRD  
RWSTVPRVVELNKNSQPDEVVVPLDSMCSAGANAHKPSYPHSWRKEDAQI-----  
-----

>TRPV4\_Takydromus\_tachydromoides

MANLEDAAHASPSESTESPSEELSPQNDSFPLSSLANLFENEDGAPAAEAARTPPGAG  
DGKQNLRMKFHGAFRKGVNPNMDLLESTIYESSVSGPKKAPMDSLFDYGTTRHHPS  
DNKRRRKKALEKKPPSTKGPAPHPPIPKVFNRPILFDIVSRGSTADLDGLLPFLTHK  
KRLTDEEFREPSTGKTCLPKALLNLNNGKNDTIPFLLDIAEKTGSTREFINSPFRDVY  
RGQTAHIAIERRCKHYVELLVEKGADVHAQARGRFFQPKDEGGYFYFGELPLSLAAC  
TNQPHIVHYLTENAHKQADLRRQDSRGNTVLHALVAIADNTRENTKFTVTKMYDILLI  
KCAKLPDNTNLEALLNNDGLSPLMMAAKTGKIGAFQHIIRREIKDEEDARHLSRKFKD  
WAYGPVYSSLYDLSSLDTCGEEEDSVLEILVYNSKMNENRHEMLAVEPINELLRDKWRKF  
GAVSFYISVVSYLECAMIIFTMVAYYRPLEGTPPYPTTTTDDYLRLAGEIVTLFTGVLFFF  
TNIKDLFMKKCPGVNSFFIDGSFQLLYFIYSVLVLAALYLTGIEAYLAVMVFALVLG  
WMNALYFTRGLKLTGTYSIMIQKILFEDLFRLLVYVLFMIGYASALVSLNPNPCPSSEAC  
SEERSNCTAPAYPSCRDSKTFSNFLDLFKLTIGMGDLEMIESAKYPGVFVILLVTYIIL  
FVLLNMLIALMGETVGQVSKEKQIWKLQWATTILDIERFFPVFRKAFRSGEMVTV  
GKSLDGTPDRRWCFRVDEVNWFHWNQNLGIINEDPGKNDTYQYYGFSHTVGRLLRD  
RWSTVPRVVELNKNLQPDEVVVPLDSMRSPAANEHKPSYPQSWRKEDSHI-----  
-----

>TRPV4\_Oreochromis\_mossambicus

MNEGRSAIFKRRHLALPKGNAISSEPSISVDLGDSEAAQPEGDGAFPLSEFSHLFESQD  
GPPATQDSSQESILEPAQPGHPADSRQYLRMKFHGAFKKGISNPMDLLESTIYESNVVP  
APKKAPMDSLFDYGTYGNSNQQKRRRKKLPKGKTEASCDESQSSDPPKVVKVFNRSLL  
FDCVSRGDPGELEGLLEYLQSNKRRLTDEEFREPYTGKTCLPKALMNLYGRQNNTIPV  
LVDIAEKNGSLREFINTPFRDVYYRGQTALHIAIERRCKQYVKLLVEKGADVHAQARG  
RFFQPKDEGGYFYFGELPLSLAACTNQPDIVHYLTENPHKKADVRRQDSRGNTVLHAL  
VHIADNTKDNTFRFLTKMYDLLLLIKTAKLYPDCNLETVPNNDGMSPLMMAARLGKIGI  
FQHIIREIKDEEVRHLSRKFKDWAYGPVYSSLYDLSSLDTCGKESSVLEILVYTSHNEN  
RHEMLAVEPINELLRAKWNRFAAVTFYISVFSYLITMIIFTLVAYYQPTHGKPPYPHTT  
SSDYWRLAGEIVTLASGIFFLTNIKDLFLKKCPGVKSLFIDGSFQLLYFIYSVLIVTAAL  
YLSGIEAYVSMVVFALALGWMNTLYFTRGLKLTGTYSIMIQLFKDLFRLLVYVLFM  
IGFASALVSLLTVCPPPGTVCNGSCPTYACRDNNTFSIFLLDLFKLTIGMGDLDMIYSA  
QNPVVFLILLVITYIILTFVLLLNMIALMGETVGQVSKESKKIWKLQWATTILDIERSFP  
VCLRKSFRVEMVTVGKNYDGTDDRWCFRVDEVNWCHWNQNLAIINEDPGKSETI  
QANGLQQGVRALRRDRWSTVVPRAVELSKGSQSHDLAVEMEPLSPRH-----  
-----

>TRPV4\_Gasterosteus\_aculeatus

MNEGRSALFRRCHLALSADTVGSVPGRNAASVDSGDGAAPQPDGDAALGLSELSHL  
FENDDGSPSTQDTSGGSAPELVQPGQPAEGRQNLRMKFQGAFRKGIHMDLLESTIY  
ESNVVQGPKKAPMDSLFDYGTTCRNTSNQKRRRKKLPRGKTEASCDDDGQSSDPPKV  
MKVFNRSLLFDAVSRADPEALEGLLEYLQSHKRLTDEEFKELSTGKTCLPKALLNLY  
GGQNVTIPLLDVAEKTGNLREFINTPFRDVYYRGQTALHIAIERRCKQYVELMVEHG  
ADVHAQARGRFFQPRDEGGYFYFGELPLSLAACTNQPNIVHYLTENPHKKADLRRQD  
SRGNTVLHALVHIADNTKDNTFRFLTKMYDLLLVSASAKLYPDCNLETVLNNDGMSPLM  
MAAKLGKIGVVFQHIIREIKDEEVRQLSRKFKDWAYGPVYSSLYDLSSLDTCGEEPSVL  
EILVYNSRNENRHEMLAVEPINELLRAKWQKFAAVTFYISVVSYLITMIIFTLVAYYHP  
TQGTTPPYPTTSSDYLRMAGEILTLASGIFFLTNIKDLFLKKCPGVKSLFMDGSFQLLY  
FIYSVLIVVTAALYLSGIKAYVSMVVFALVLGWMNTLYFTRGLKLTGTYSIMIQLFKD  
LFRLLVYVLFMIGYASALVSLTMCPPPGTECEGGCPTYPKCRDPDTFSALLDLFLK  
TIGMGELDMIHGAQYPAVFLILLVITYIILTFVLLLNMIALMGETVGQVSKESKKIWKL  
QWATTILDIERSFPVCLRKSFRAGEMVTVGKSWDGTDDRWCFRVDEVNWCHWNQ  
NLAIINEDPGKNEVCQANGLQQGVRALRRAVDRWSTVVPRAVELSKGPRPRDLSEIEM  
EPL-----
